# Supplementary material for: Identification of a metabolic-related gene signature predicting the overall survival for patients with stomach adenocarcinoma
Source: PeerJ. 2021 Feb 8;9:e10908. doi: 10.7717/peerj.10908 (PMC7877239; doi:10.7717/peerj.10908)
Supplement: Supplemental Information 2 [file peerj-09-10908-s002.xlsx]

## Sheet: Sheet1
!Sample_geo_accession	!Sample_status	!Sample_submission_date	!Sample_last_update_date	!Sample_type	!Sample_channel_count	!Sample_source_name_ch1	!Sample_organism_ch1	!Sample_characteristics_ch1	!Sample_characteristics_ch1	!Sample_characteristics_ch1	!Sample_characteristics_ch1	!Sample_characteristics_ch1	!Sample_characteristics_ch1	!Sample_characteristics_ch1	!Sample_molecule_ch1	!Sample_extract_protocol_ch1	!Sample_label_ch1	!Sample_label_protocol_ch1	!Sample_taxid_ch1	!Sample_hyb_protocol	!Sample_scan_protocol	!Sample_description	!Sample_data_processing	!Sample_platform_id	!Sample_contact_name	!Sample_contact_institute	!Sample_contact_address	!Sample_contact_city	!Sample_contact_zip/postal_code	!Sample_contact_country	!Sample_supplementary_file	!Sample_data_row_count
GSM2235556	Public on Mar 20 2018	Jul 14 2016	Mar 20 2018	RNA	1	Human gastric cancer	Homo sapiens	tissue: gastric cancer	age: 61	Sex: male	ptstage: T3	pnstage: N1	death: 1	duration overall survival: 70	total RNA	RecoverAll鈩?total nucleic acid isolation kit (Ambion) or the mirVana RNA Isolation Labeling Kit (Ambion) were used. Quality control was performed with NanoDrop 2000 (Thermo Fischer Scientific) and RNA Nano 6000 chip (Agilent).	biotin	Illumina TotalPrep鈩?RNA Amplification Kit was used for cRNA synthesis.	9606	Illumina TotalPrep鈩?RNA Amplification Kit was used for cRNA synthesis.	Standard Illumina scanning protocol	SAMPLE 1	Genomestudio, quantile normalization	GPL6947	Yong-Min,,Huh	Yonsei University	50 Shinchon-ro	Seoul	120-749	South Korea	ftp://ftp.ncbi.nlm.nih.gov/geo/samples/GSM2235nnn/GSM2235556/suppl/GSM2235556_5455362041_D_Grn.idat.gz	48708
GSM2235557	Public on Mar 20 2018	Jul 14 2016	Mar 20 2018	RNA	1	Human gastric cancer	Homo sapiens	tissue: gastric cancer	age: 47	Sex: female	ptstage: T4	pnstage: N3	death: 1	duration overall survival: 23	total RNA	RecoverAll鈩?total nucleic acid isolation kit (Ambion) or the mirVana RNA Isolation Labeling Kit (Ambion) were used. Quality control was performed with NanoDrop 2000 (Thermo Fischer Scientific) and RNA Nano 6000 chip (Agilent).	biotin	Illumina TotalPrep鈩?RNA Amplification Kit was used for cRNA synthesis.	9606	Illumina TotalPrep鈩?RNA Amplification Kit was used for cRNA synthesis.	Standard Illumina scanning protocol	SAMPLE 2	Genomestudio, quantile normalization	GPL6947	Yong-Min,,Huh	Yonsei University	50 Shinchon-ro	Seoul	120-749	South Korea	ftp://ftp.ncbi.nlm.nih.gov/geo/samples/GSM2235nnn/GSM2235557/suppl/GSM2235557_5455362041_E_Grn.idat.gz	48708
GSM2235558	Public on Mar 20 2018	Jul 14 2016	Mar 20 2018	RNA	1	Human gastric cancer	Homo sapiens	tissue: gastric cancer	age: 72	Sex: male	ptstage: T4	pnstage: N1	death: 1	duration overall survival: 24	total RNA	RecoverAll鈩?total nucleic acid isolation kit (Ambion) or the mirVana RNA Isolation Labeling Kit (Ambion) were used. Quality control was performed with NanoDrop 2000 (Thermo Fischer Scientific) and RNA Nano 6000 chip (Agilent).	biotin	Illumina TotalPrep鈩?RNA Amplification Kit was used for cRNA synthesis.	9606	Illumina TotalPrep鈩?RNA Amplification Kit was used for cRNA synthesis.	Standard Illumina scanning protocol	SAMPLE 3	Genomestudio, quantile normalization	GPL6947	Yong-Min,,Huh	Yonsei University	50 Shinchon-ro	Seoul	120-749	South Korea	ftp://ftp.ncbi.nlm.nih.gov/geo/samples/GSM2235nnn/GSM2235558/suppl/GSM2235558_5455362041_F_Grn.idat.gz	48708
GSM2235559	Public on Mar 20 2018	Jul 14 2016	Mar 20 2018	RNA	1	Human gastric cancer	Homo sapiens	tissue: gastric cancer	age: 78	Sex: male	ptstage: T3	pnstage: N2	death: 1	duration overall survival: 59	total RNA	RecoverAll鈩?total nucleic acid isolation kit (Ambion) or the mirVana RNA Isolation Labeling Kit (Ambion) were used. Quality control was performed with NanoDrop 2000 (Thermo Fischer Scientific) and RNA Nano 6000 chip (Agilent).	biotin	Illumina TotalPrep鈩?RNA Amplification Kit was used for cRNA synthesis.	9606	Illumina TotalPrep鈩?RNA Amplification Kit was used for cRNA synthesis.	Standard Illumina scanning protocol	SAMPLE 4	Genomestudio, quantile normalization	GPL6947	Yong-Min,,Huh	Yonsei University	50 Shinchon-ro	Seoul	120-749	South Korea	ftp://ftp.ncbi.nlm.nih.gov/geo/samples/GSM2235nnn/GSM2235559/suppl/GSM2235559_5455362041_G_Grn.idat.gz	48708
GSM2235560	Public on Mar 20 2018	Jul 14 2016	Mar 20 2018	RNA	1	Human gastric cancer	Homo sapiens	tissue: gastric cancer	age: 58	Sex: male	ptstage: T4	pnstage: N0	death: 1	duration overall survival: 12	total RNA	RecoverAll鈩?total nucleic acid isolation kit (Ambion) or the mirVana RNA Isolation Labeling Kit (Ambion) were used. Quality control was performed with NanoDrop 2000 (Thermo Fischer Scientific) and RNA Nano 6000 chip (Agilent).	biotin	Illumina TotalPrep鈩?RNA Amplification Kit was used for cRNA synthesis.	9606	Illumina TotalPrep鈩?RNA Amplification Kit was used for cRNA synthesis.	Standard Illumina scanning protocol	SAMPLE 5	Genomestudio, quantile normalization	GPL6947	Yong-Min,,Huh	Yonsei University	50 Shinchon-ro	Seoul	120-749	South Korea	ftp://ftp.ncbi.nlm.nih.gov/geo/samples/GSM2235nnn/GSM2235560/suppl/GSM2235560_5455362041_H_Grn.idat.gz	48708
GSM2235561	Public on Mar 20 2018	Jul 14 2016	Mar 20 2018	RNA	1	Human gastric cancer	Homo sapiens	tissue: gastric cancer	age: 33	Sex: female	ptstage: T4	pnstage: N2	death: 0	duration overall survival: 85	total RNA	RecoverAll鈩?total nucleic acid isolation kit (Ambion) or the mirVana RNA Isolation Labeling Kit (Ambion) were used. Quality control was performed with NanoDrop 2000 (Thermo Fischer Scientific) and RNA Nano 6000 chip (Agilent).	biotin	Illumina TotalPrep鈩?RNA Amplification Kit was used for cRNA synthesis.	9606	Illumina TotalPrep鈩?RNA Amplification Kit was used for cRNA synthesis.	Standard Illumina scanning protocol	SAMPLE 6	Genomestudio, quantile normalization	GPL6947	Yong-Min,,Huh	Yonsei University	50 Shinchon-ro	Seoul	120-749	South Korea	ftp://ftp.ncbi.nlm.nih.gov/geo/samples/GSM2235nnn/GSM2235561/suppl/GSM2235561_5455362041_I_Grn.idat.gz	48708
GSM2235562	Public on Mar 20 2018	Jul 14 2016	Mar 20 2018	RNA	1	Human gastric cancer	Homo sapiens	tissue: gastric cancer	age: 81	Sex: female	ptstage: T4	pnstage: N2	death: 1	duration overall survival: 18	total RNA	RecoverAll鈩?total nucleic acid isolation kit (Ambion) or the mirVana RNA Isolation Labeling Kit (Ambion) were used. Quality control was performed with NanoDrop 2000 (Thermo Fischer Scientific) and RNA Nano 6000 chip (Agilent).	biotin	Illumina TotalPrep鈩?RNA Amplification Kit was used for cRNA synthesis.	9606	Illumina TotalPrep鈩?RNA Amplification Kit was used for cRNA synthesis.	Standard Illumina scanning protocol	SAMPLE 7	Genomestudio, quantile normalization	GPL6947	Yong-Min,,Huh	Yonsei University	50 Shinchon-ro	Seoul	120-749	South Korea	ftp://ftp.ncbi.nlm.nih.gov/geo/samples/GSM2235nnn/GSM2235562/suppl/GSM2235562_5455362041_J_Grn.idat.gz	48708
GSM2235563	Public on Mar 20 2018	Jul 14 2016	Mar 20 2018	RNA	1	Human gastric cancer	Homo sapiens	tissue: gastric cancer	age: 60	Sex: female	ptstage: T3	pnstage: N2	death: 1	duration overall survival: 14	total RNA	RecoverAll鈩?total nucleic acid isolation kit (Ambion) or the mirVana RNA Isolation Labeling Kit (Ambion) were used. Quality control was performed with NanoDrop 2000 (Thermo Fischer Scientific) and RNA Nano 6000 chip (Agilent).	biotin	Illumina TotalPrep鈩?RNA Amplification Kit was used for cRNA synthesis.	9606	Illumina TotalPrep鈩?RNA Amplification Kit was used for cRNA synthesis.	Standard Illumina scanning protocol	SAMPLE 8	Genomestudio, quantile normalization	GPL6947	Yong-Min,,Huh	Yonsei University	50 Shinchon-ro	Seoul	120-749	South Korea	ftp://ftp.ncbi.nlm.nih.gov/geo/samples/GSM2235nnn/GSM2235563/suppl/GSM2235563_5455362041_K_Grn.idat.gz	48708
GSM2235564	Public on Mar 20 2018	Jul 14 2016	Mar 20 2018	RNA	1	Human gastric cancer	Homo sapiens	tissue: gastric cancer	age: 61	Sex: male	ptstage: T3	pnstage: N1	death: 0	duration overall survival: 84	total RNA	RecoverAll鈩?total nucleic acid isolation kit (Ambion) or the mirVana RNA Isolation Labeling Kit (Ambion) were used. Quality control was performed with NanoDrop 2000 (Thermo Fischer Scientific) and RNA Nano 6000 chip (Agilent).	biotin	Illumina TotalPrep鈩?RNA Amplification Kit was used for cRNA synthesis.	9606	Illumina TotalPrep鈩?RNA Amplification Kit was used for cRNA synthesis.	Standard Illumina scanning protocol	SAMPLE 9	Genomestudio, quantile normalization	GPL6947	Yong-Min,,Huh	Yonsei University	50 Shinchon-ro	Seoul	120-749	South Korea	ftp://ftp.ncbi.nlm.nih.gov/geo/samples/GSM2235nnn/GSM2235564/suppl/GSM2235564_5455160044_A_Grn.idat.gz	48708
GSM2235565	Public on Mar 20 2018	Jul 14 2016	Mar 20 2018	RNA	1	Human gastric cancer	Homo sapiens	tissue: gastric cancer	age: 49	Sex: female	ptstage: T4	pnstage: N0	death: 1	duration overall survival: 65	total RNA	RecoverAll鈩?total nucleic acid isolation kit (Ambion) or the mirVana RNA Isolation Labeling Kit (Ambion) were used. Quality control was performed with NanoDrop 2000 (Thermo Fischer Scientific) and RNA Nano 6000 chip (Agilent).	biotin	Illumina TotalPrep鈩?RNA Amplification Kit was used for cRNA synthesis.	9606	Illumina TotalPrep鈩?RNA Amplification Kit was used for cRNA synthesis.	Standard Illumina scanning protocol	SAMPLE 10	Genomestudio, quantile normalization	GPL6947	Yong-Min,,Huh	Yonsei University	50 Shinchon-ro	Seoul	120-749	South Korea	ftp://ftp.ncbi.nlm.nih.gov/geo/samples/GSM2235nnn/GSM2235565/suppl/GSM2235565_5455160044_B_Grn.idat.gz	48708
GSM2235566	Public on Mar 20 2018	Jul 14 2016	Mar 20 2018	RNA	1	Human gastric cancer	Homo sapiens	tissue: gastric cancer	age: 44	Sex: male	ptstage: T4	pnstage: N2	death: 1	duration overall survival: 11	total RNA	RecoverAll鈩?total nucleic acid isolation kit (Ambion) or the mirVana RNA Isolation Labeling Kit (Ambion) were used. Quality control was performed with NanoDrop 2000 (Thermo Fischer Scientific) and RNA Nano 6000 chip (Agilent).	biotin	Illumina TotalPrep鈩?RNA Amplification Kit was used for cRNA synthesis.	9606	Illumina TotalPrep鈩?RNA Amplification Kit was used for cRNA synthesis.	Standard Illumina scanning protocol	SAMPLE 11	Genomestudio, quantile normalization	GPL6947	Yong-Min,,Huh	Yonsei University	50 Shinchon-ro	Seoul	120-749	South Korea	ftp://ftp.ncbi.nlm.nih.gov/geo/samples/GSM2235nnn/GSM2235566/suppl/GSM2235566_5455160044_C_Grn.idat.gz	48708
GSM2235567	Public on Mar 20 2018	Jul 14 2016	Mar 20 2018	RNA	1	Human gastric cancer	Homo sapiens	tissue: gastric cancer	age: 51	Sex: male	ptstage: T4	pnstage: N2	death: 1	duration overall survival: 43	total RNA	RecoverAll鈩?total nucleic acid isolation kit (Ambion) or the mirVana RNA Isolation Labeling Kit (Ambion) were used. Quality control was performed with NanoDrop 2000 (Thermo Fischer Scientific) and RNA Nano 6000 chip (Agilent).	biotin	Illumina TotalPrep鈩?RNA Amplification Kit was used for cRNA synthesis.	9606	Illumina TotalPrep鈩?RNA Amplification Kit was used for cRNA synthesis.	Standard Illumina scanning protocol	SAMPLE 12	Genomestudio, quantile normalization	GPL6947	Yong-Min,,Huh	Yonsei University	50 Shinchon-ro	Seoul	120-749	South Korea	ftp://ftp.ncbi.nlm.nih.gov/geo/samples/GSM2235nnn/GSM2235567/suppl/GSM2235567_5455160044_D_Grn.idat.gz	48708
GSM2235568	Public on Mar 20 2018	Jul 14 2016	Mar 20 2018	RNA	1	Human gastric cancer	Homo sapiens	tissue: gastric cancer	age: 58	Sex: female	ptstage: T3	pnstage: N1	death: 0	duration overall survival: 82	total RNA	RecoverAll鈩?total nucleic acid isolation kit (Ambion) or the mirVana RNA Isolation Labeling Kit (Ambion) were used. Quality control was performed with NanoDrop 2000 (Thermo Fischer Scientific) and RNA Nano 6000 chip (Agilent).	biotin	Illumina TotalPrep鈩?RNA Amplification Kit was used for cRNA synthesis.	9606	Illumina TotalPrep鈩?RNA Amplification Kit was used for cRNA synthesis.	Standard Illumina scanning protocol	SAMPLE 13	Genomestudio, quantile normalization	GPL6947	Yong-Min,,Huh	Yonsei University	50 Shinchon-ro	Seoul	120-749	South Korea	ftp://ftp.ncbi.nlm.nih.gov/geo/samples/GSM2235nnn/GSM2235568/suppl/GSM2235568_5455160044_E_Grn.idat.gz	48708
GSM2235569	Public on Mar 20 2018	Jul 14 2016	Mar 20 2018	RNA	1	Human gastric cancer	Homo sapiens	tissue: gastric cancer	age: 79	Sex: male	ptstage: T4	pnstage: N1	death: 0	duration overall survival: 82	total RNA	RecoverAll鈩?total nucleic acid isolation kit (Ambion) or the mirVana RNA Isolation Labeling Kit (Ambion) were used. Quality control was performed with NanoDrop 2000 (Thermo Fischer Scientific) and RNA Nano 6000 chip (Agilent).	biotin	Illumina TotalPrep鈩?RNA Amplification Kit was used for cRNA synthesis.	9606	Illumina TotalPrep鈩?RNA Amplification Kit was used for cRNA synthesis.	Standard Illumina scanning protocol	SAMPLE 14	Genomestudio, quantile normalization	GPL6947	Yong-Min,,Huh	Yonsei University	50 Shinchon-ro	Seoul	120-749	South Korea	ftp://ftp.ncbi.nlm.nih.gov/geo/samples/GSM2235nnn/GSM2235569/suppl/GSM2235569_5455160044_F_Grn.idat.gz	48708
GSM2235570	Public on Mar 20 2018	Jul 14 2016	Mar 20 2018	RNA	1	Human gastric cancer	Homo sapiens	tissue: gastric cancer	age: 77	Sex: male	ptstage: T4	pnstage: N0	death: 0	duration overall survival: 81	total RNA	RecoverAll鈩?total nucleic acid isolation kit (Ambion) or the mirVana RNA Isolation Labeling Kit (Ambion) were used. Quality control was performed with NanoDrop 2000 (Thermo Fischer Scientific) and RNA Nano 6000 chip (Agilent).	biotin	Illumina TotalPrep鈩?RNA Amplification Kit was used for cRNA synthesis.	9606	Illumina TotalPrep鈩?RNA Amplification Kit was used for cRNA synthesis.	Standard Illumina scanning protocol	SAMPLE 15	Genomestudio, quantile normalization	GPL6947	Yong-Min,,Huh	Yonsei University	50 Shinchon-ro	Seoul	120-749	South Korea	ftp://ftp.ncbi.nlm.nih.gov/geo/samples/GSM2235nnn/GSM2235570/suppl/GSM2235570_5455160044_G_Grn.idat.gz	48708
GSM2235571	Public on Mar 20 2018	Jul 14 2016	Mar 20 2018	RNA	1	Human gastric cancer	Homo sapiens	tissue: gastric cancer	age: 85	Sex: female	ptstage: T3	pnstage: N1	death: 0	duration overall survival: 80	total RNA	RecoverAll鈩?total nucleic acid isolation kit (Ambion) or the mirVana RNA Isolation Labeling Kit (Ambion) were used. Quality control was performed with NanoDrop 2000 (Thermo Fischer Scientific) and RNA Nano 6000 chip (Agilent).	biotin	Illumina TotalPrep鈩?RNA Amplification Kit was used for cRNA synthesis.	9606	Illumina TotalPrep鈩?RNA Amplification Kit was used for cRNA synthesis.	Standard Illumina scanning protocol	SAMPLE 16	Genomestudio, quantile normalization	GPL6947	Yong-Min,,Huh	Yonsei University	50 Shinchon-ro	Seoul	120-749	South Korea	ftp://ftp.ncbi.nlm.nih.gov/geo/samples/GSM2235nnn/GSM2235571/suppl/GSM2235571_5455160044_I_Grn.idat.gz	48708
GSM2235572	Public on Mar 20 2018	Jul 14 2016	Mar 20 2018	RNA	1	Human gastric cancer	Homo sapiens	tissue: gastric cancer	age: 68	Sex: female	ptstage: T4	pnstage: N1	death: 0	duration overall survival: 86	total RNA	RecoverAll鈩?total nucleic acid isolation kit (Ambion) or the mirVana RNA Isolation Labeling Kit (Ambion) were used. Quality control was performed with NanoDrop 2000 (Thermo Fischer Scientific) and RNA Nano 6000 chip (Agilent).	biotin	Illumina TotalPrep鈩?RNA Amplification Kit was used for cRNA synthesis.	9606	Illumina TotalPrep鈩?RNA Amplification Kit was used for cRNA synthesis.	Standard Illumina scanning protocol	SAMPLE 17	Genomestudio, quantile normalization	GPL6947	Yong-Min,,Huh	Yonsei University	50 Shinchon-ro	Seoul	120-749	South Korea	ftp://ftp.ncbi.nlm.nih.gov/geo/samples/GSM2235nnn/GSM2235572/suppl/GSM2235572_5455160044_J_Grn.idat.gz	48708
GSM2235573	Public on Mar 20 2018	Jul 14 2016	Mar 20 2018	RNA	1	Human gastric cancer	Homo sapiens	tissue: gastric cancer	age: 52	Sex: male	ptstage: T4	pnstage: N2	death: 0	duration overall survival: 82	total RNA	RecoverAll鈩?total nucleic acid isolation kit (Ambion) or the mirVana RNA Isolation Labeling Kit (Ambion) were used. Quality control was performed with NanoDrop 2000 (Thermo Fischer Scientific) and RNA Nano 6000 chip (Agilent).	biotin	Illumina TotalPrep鈩?RNA Amplification Kit was used for cRNA synthesis.	9606	Illumina TotalPrep鈩?RNA Amplification Kit was used for cRNA synthesis.	Standard Illumina scanning protocol	SAMPLE 18	Genomestudio, quantile normalization	GPL6947	Yong-Min,,Huh	Yonsei University	50 Shinchon-ro	Seoul	120-749	South Korea	ftp://ftp.ncbi.nlm.nih.gov/geo/samples/GSM2235nnn/GSM2235573/suppl/GSM2235573_5452655015_A_Grn.idat.gz	48708
GSM2235574	Public on Mar 20 2018	Jul 14 2016	Mar 20 2018	RNA	1	Human gastric cancer	Homo sapiens	tissue: gastric cancer	age: 72	Sex: male	ptstage: T4	pnstage: N2	death: 1	duration overall survival: 11	total RNA	RecoverAll鈩?total nucleic acid isolation kit (Ambion) or the mirVana RNA Isolation Labeling Kit (Ambion) were used. Quality control was performed with NanoDrop 2000 (Thermo Fischer Scientific) and RNA Nano 6000 chip (Agilent).	biotin	Illumina TotalPrep鈩?RNA Amplification Kit was used for cRNA synthesis.	9606	Illumina TotalPrep鈩?RNA Amplification Kit was used for cRNA synthesis.	Standard Illumina scanning protocol	SAMPLE 19	Genomestudio, quantile normalization	GPL6947	Yong-Min,,Huh	Yonsei University	50 Shinchon-ro	Seoul	120-749	South Korea	ftp://ftp.ncbi.nlm.nih.gov/geo/samples/GSM2235nnn/GSM2235574/suppl/GSM2235574_5452655015_B_Grn.idat.gz	48708
GSM2235575	Public on Mar 20 2018	Jul 14 2016	Mar 20 2018	RNA	1	Human gastric cancer	Homo sapiens	tissue: gastric cancer	age: 59	Sex: male	ptstage: T3	pnstage: N1	death: 0	duration overall survival: 86	total RNA	RecoverAll鈩?total nucleic acid isolation kit (Ambion) or the mirVana RNA Isolation Labeling Kit (Ambion) were used. Quality control was performed with NanoDrop 2000 (Thermo Fischer Scientific) and RNA Nano 6000 chip (Agilent).	biotin	Illumina TotalPrep鈩?RNA Amplification Kit was used for cRNA synthesis.	9606	Illumina TotalPrep鈩?RNA Amplification Kit was used for cRNA synthesis.	Standard Illumina scanning protocol	SAMPLE 20	Genomestudio, quantile normalization	GPL6947	Yong-Min,,Huh	Yonsei University	50 Shinchon-ro	Seoul	120-749	South Korea	ftp://ftp.ncbi.nlm.nih.gov/geo/samples/GSM2235nnn/GSM2235575/suppl/GSM2235575_5452655015_C_Grn.idat.gz	48708
GSM2235576	Public on Mar 20 2018	Jul 14 2016	Mar 20 2018	RNA	1	Human gastric cancer	Homo sapiens	tissue: gastric cancer	age: 78	Sex: female	ptstage: T3	pnstage: N2	death: 1	duration overall survival: 4	total RNA	RecoverAll鈩?total nucleic acid isolation kit (Ambion) or the mirVana RNA Isolation Labeling Kit (Ambion) were used. Quality control was performed with NanoDrop 2000 (Thermo Fischer Scientific) and RNA Nano 6000 chip (Agilent).	biotin	Illumina TotalPrep鈩?RNA Amplification Kit was used for cRNA synthesis.	9606	Illumina TotalPrep鈩?RNA Amplification Kit was used for cRNA synthesis.	Standard Illumina scanning protocol	SAMPLE 21	Genomestudio, quantile normalization	GPL6947	Yong-Min,,Huh	Yonsei University	50 Shinchon-ro	Seoul	120-749	South Korea	ftp://ftp.ncbi.nlm.nih.gov/geo/samples/GSM2235nnn/GSM2235576/suppl/GSM2235576_5452655015_E_Grn.idat.gz	48708
GSM2235577	Public on Mar 20 2018	Jul 14 2016	Mar 20 2018	RNA	1	Human gastric cancer	Homo sapiens	tissue: gastric cancer	age: 32	Sex: female	ptstage: T4	pnstage: N0	death: 1	duration overall survival: 19	total RNA	RecoverAll鈩?total nucleic acid isolation kit (Ambion) or the mirVana RNA Isolation Labeling Kit (Ambion) were used. Quality control was performed with NanoDrop 2000 (Thermo Fischer Scientific) and RNA Nano 6000 chip (Agilent).	biotin	Illumina TotalPrep鈩?RNA Amplification Kit was used for cRNA synthesis.	9606	Illumina TotalPrep鈩?RNA Amplification Kit was used for cRNA synthesis.	Standard Illumina scanning protocol	SAMPLE 22	Genomestudio, quantile normalization	GPL6947	Yong-Min,,Huh	Yonsei University	50 Shinchon-ro	Seoul	120-749	South Korea	ftp://ftp.ncbi.nlm.nih.gov/geo/samples/GSM2235nnn/GSM2235577/suppl/GSM2235577_5452655015_F_Grn.idat.gz	48708
GSM2235578	Public on Mar 20 2018	Jul 14 2016	Mar 20 2018	RNA	1	Human gastric cancer	Homo sapiens	tissue: gastric cancer	age: 68	Sex: male	ptstage: T4	pnstage: N2	death: 1	duration overall survival: 21	total RNA	RecoverAll鈩?total nucleic acid isolation kit (Ambion) or the mirVana RNA Isolation Labeling Kit (Ambion) were used. Quality control was performed with NanoDrop 2000 (Thermo Fischer Scientific) and RNA Nano 6000 chip (Agilent).	biotin	Illumina TotalPrep鈩?RNA Amplification Kit was used for cRNA synthesis.	9606	Illumina TotalPrep鈩?RNA Amplification Kit was used for cRNA synthesis.	Standard Illumina scanning protocol	SAMPLE 23	Genomestudio, quantile normalization	GPL6947	Yong-Min,,Huh	Yonsei University	50 Shinchon-ro	Seoul	120-749	South Korea	ftp://ftp.ncbi.nlm.nih.gov/geo/samples/GSM2235nnn/GSM2235578/suppl/GSM2235578_5452655015_G_Grn.idat.gz	48708
GSM2235579	Public on Mar 20 2018	Jul 14 2016	Mar 20 2018	RNA	1	Human gastric cancer	Homo sapiens	tissue: gastric cancer	age: 74	Sex: male	ptstage: T3	pnstage: N1	death: 1	duration overall survival: 17	total RNA	RecoverAll鈩?total nucleic acid isolation kit (Ambion) or the mirVana RNA Isolation Labeling Kit (Ambion) were used. Quality control was performed with NanoDrop 2000 (Thermo Fischer Scientific) and RNA Nano 6000 chip (Agilent).	biotin	Illumina TotalPrep鈩?RNA Amplification Kit was used for cRNA synthesis.	9606	Illumina TotalPrep鈩?RNA Amplification Kit was used for cRNA synthesis.	Standard Illumina scanning protocol	SAMPLE 24	Genomestudio, quantile normalization	GPL6947	Yong-Min,,Huh	Yonsei University	50 Shinchon-ro	Seoul	120-749	South Korea	ftp://ftp.ncbi.nlm.nih.gov/geo/samples/GSM2235nnn/GSM2235579/suppl/GSM2235579_5452655015_H_Grn.idat.gz	48708
GSM2235580	Public on Mar 20 2018	Jul 14 2016	Mar 20 2018	RNA	1	Human gastric cancer	Homo sapiens	tissue: gastric cancer	age: 61	Sex: male	ptstage: T4	pnstage: N2	death: 1	duration overall survival: 25	total RNA	RecoverAll鈩?total nucleic acid isolation kit (Ambion) or the mirVana RNA Isolation Labeling Kit (Ambion) were used. Quality control was performed with NanoDrop 2000 (Thermo Fischer Scientific) and RNA Nano 6000 chip (Agilent).	biotin	Illumina TotalPrep鈩?RNA Amplification Kit was used for cRNA synthesis.	9606	Illumina TotalPrep鈩?RNA Amplification Kit was used for cRNA synthesis.	Standard Illumina scanning protocol	SAMPLE 25	Genomestudio, quantile normalization	GPL6947	Yong-Min,,Huh	Yonsei University	50 Shinchon-ro	Seoul	120-749	South Korea	ftp://ftp.ncbi.nlm.nih.gov/geo/samples/GSM2235nnn/GSM2235580/suppl/GSM2235580_5452655015_J_Grn.idat.gz	48708
GSM2235582	Public on Mar 20 2018	Jul 14 2016	Mar 20 2018	RNA	1	Human gastric cancer	Homo sapiens	tissue: gastric cancer	age: 65	Sex: male	ptstage: T4	pnstage: N0	death: 1	duration overall survival: 13	total RNA	RecoverAll鈩?total nucleic acid isolation kit (Ambion) or the mirVana RNA Isolation Labeling Kit (Ambion) were used. Quality control was performed with NanoDrop 2000 (Thermo Fischer Scientific) and RNA Nano 6000 chip (Agilent).	biotin	Illumina TotalPrep鈩?RNA Amplification Kit was used for cRNA synthesis.	9606	Illumina TotalPrep鈩?RNA Amplification Kit was used for cRNA synthesis.	Standard Illumina scanning protocol	SAMPLE 27	Genomestudio, quantile normalization	GPL6947	Yong-Min,,Huh	Yonsei University	50 Shinchon-ro	Seoul	120-749	South Korea	ftp://ftp.ncbi.nlm.nih.gov/geo/samples/GSM2235nnn/GSM2235582/suppl/GSM2235582_5452655015_L_Grn.idat.gz	48708
GSM2235584	Public on Mar 20 2018	Jul 14 2016	Mar 20 2018	RNA	1	Human gastric cancer	Homo sapiens	tissue: gastric cancer	age: 71	Sex: male	ptstage: T4	pnstage: N2	death: 1	duration overall survival: 57	total RNA	RecoverAll鈩?total nucleic acid isolation kit (Ambion) or the mirVana RNA Isolation Labeling Kit (Ambion) were used. Quality control was performed with NanoDrop 2000 (Thermo Fischer Scientific) and RNA Nano 6000 chip (Agilent).	biotin	Illumina TotalPrep鈩?RNA Amplification Kit was used for cRNA synthesis.	9606	Illumina TotalPrep鈩?RNA Amplification Kit was used for cRNA synthesis.	Standard Illumina scanning protocol	SAMPLE 29	Genomestudio, quantile normalization	GPL6947	Yong-Min,,Huh	Yonsei University	50 Shinchon-ro	Seoul	120-749	South Korea	ftp://ftp.ncbi.nlm.nih.gov/geo/samples/GSM2235nnn/GSM2235584/suppl/GSM2235584_5455362025_B_Grn.idat.gz	48708
GSM2235585	Public on Mar 20 2018	Jul 14 2016	Mar 20 2018	RNA	1	Human gastric cancer	Homo sapiens	tissue: gastric cancer	age: 71	Sex: male	ptstage: T3	pnstage: N1	death: 1	duration overall survival: 23	total RNA	RecoverAll鈩?total nucleic acid isolation kit (Ambion) or the mirVana RNA Isolation Labeling Kit (Ambion) were used. Quality control was performed with NanoDrop 2000 (Thermo Fischer Scientific) and RNA Nano 6000 chip (Agilent).	biotin	Illumina TotalPrep鈩?RNA Amplification Kit was used for cRNA synthesis.	9606	Illumina TotalPrep鈩?RNA Amplification Kit was used for cRNA synthesis.	Standard Illumina scanning protocol	SAMPLE 30	Genomestudio, quantile normalization	GPL6947	Yong-Min,,Huh	Yonsei University	50 Shinchon-ro	Seoul	120-749	South Korea	ftp://ftp.ncbi.nlm.nih.gov/geo/samples/GSM2235nnn/GSM2235585/suppl/GSM2235585_5455362025_C_Grn.idat.gz	48708
GSM2235586	Public on Mar 20 2018	Jul 14 2016	Mar 20 2018	RNA	1	Human gastric cancer	Homo sapiens	tissue: gastric cancer	age: 71	Sex: male	ptstage: T4	pnstage: N1	death: 0	duration overall survival: 77	total RNA	RecoverAll鈩?total nucleic acid isolation kit (Ambion) or the mirVana RNA Isolation Labeling Kit (Ambion) were used. Quality control was performed with NanoDrop 2000 (Thermo Fischer Scientific) and RNA Nano 6000 chip (Agilent).	biotin	Illumina TotalPrep鈩?RNA Amplification Kit was used for cRNA synthesis.	9606	Illumina TotalPrep鈩?RNA Amplification Kit was used for cRNA synthesis.	Standard Illumina scanning protocol	SAMPLE 31	Genomestudio, quantile normalization	GPL6947	Yong-Min,,Huh	Yonsei University	50 Shinchon-ro	Seoul	120-749	South Korea	ftp://ftp.ncbi.nlm.nih.gov/geo/samples/GSM2235nnn/GSM2235586/suppl/GSM2235586_5455362025_D_Grn.idat.gz	48708
GSM2235587	Public on Mar 20 2018	Jul 14 2016	Mar 20 2018	RNA	1	Human gastric cancer	Homo sapiens	tissue: gastric cancer	age: 72	Sex: male	ptstage: T4	pnstage: N1	death: 1	duration overall survival: 64	total RNA	RecoverAll鈩?total nucleic acid isolation kit (Ambion) or the mirVana RNA Isolation Labeling Kit (Ambion) were used. Quality control was performed with NanoDrop 2000 (Thermo Fischer Scientific) and RNA Nano 6000 chip (Agilent).	biotin	Illumina TotalPrep鈩?RNA Amplification Kit was used for cRNA synthesis.	9606	Illumina TotalPrep鈩?RNA Amplification Kit was used for cRNA synthesis.	Standard Illumina scanning protocol	SAMPLE 32	Genomestudio, quantile normalization	GPL6947	Yong-Min,,Huh	Yonsei University	50 Shinchon-ro	Seoul	120-749	South Korea	ftp://ftp.ncbi.nlm.nih.gov/geo/samples/GSM2235nnn/GSM2235587/suppl/GSM2235587_5455362025_E_Grn.idat.gz	48708
GSM2235588	Public on Mar 20 2018	Jul 14 2016	Mar 20 2018	RNA	1	Human gastric cancer	Homo sapiens	tissue: gastric cancer	age: 56	Sex: male	ptstage: T4	pnstage: N1	death: 1	duration overall survival: 51	total RNA	RecoverAll鈩?total nucleic acid isolation kit (Ambion) or the mirVana RNA Isolation Labeling Kit (Ambion) were used. Quality control was performed with NanoDrop 2000 (Thermo Fischer Scientific) and RNA Nano 6000 chip (Agilent).	biotin	Illumina TotalPrep鈩?RNA Amplification Kit was used for cRNA synthesis.	9606	Illumina TotalPrep鈩?RNA Amplification Kit was used for cRNA synthesis.	Standard Illumina scanning protocol	SAMPLE 33	Genomestudio, quantile normalization	GPL6947	Yong-Min,,Huh	Yonsei University	50 Shinchon-ro	Seoul	120-749	South Korea	ftp://ftp.ncbi.nlm.nih.gov/geo/samples/GSM2235nnn/GSM2235588/suppl/GSM2235588_5455362025_F_Grn.idat.gz	48708
GSM2235589	Public on Mar 20 2018	Jul 14 2016	Mar 20 2018	RNA	1	Human gastric cancer	Homo sapiens	tissue: gastric cancer	age: 66	Sex: male	ptstage: T4	pnstage: N2	death: 0	duration overall survival: 77	total RNA	RecoverAll鈩?total nucleic acid isolation kit (Ambion) or the mirVana RNA Isolation Labeling Kit (Ambion) were used. Quality control was performed with NanoDrop 2000 (Thermo Fischer Scientific) and RNA Nano 6000 chip (Agilent).	biotin	Illumina TotalPrep鈩?RNA Amplification Kit was used for cRNA synthesis.	9606	Illumina TotalPrep鈩?RNA Amplification Kit was used for cRNA synthesis.	Standard Illumina scanning protocol	SAMPLE 34	Genomestudio, quantile normalization	GPL6947	Yong-Min,,Huh	Yonsei University	50 Shinchon-ro	Seoul	120-749	South Korea	ftp://ftp.ncbi.nlm.nih.gov/geo/samples/GSM2235nnn/GSM2235589/suppl/GSM2235589_5455362025_G_Grn.idat.gz	48708
GSM2235593	Public on Mar 20 2018	Jul 14 2016	Mar 20 2018	RNA	1	Human gastric cancer	Homo sapiens	tissue: gastric cancer	age: 56	Sex: male	ptstage: T4	pnstage: N0	death: 0	duration overall survival: 77	total RNA	RecoverAll鈩?total nucleic acid isolation kit (Ambion) or the mirVana RNA Isolation Labeling Kit (Ambion) were used. Quality control was performed with NanoDrop 2000 (Thermo Fischer Scientific) and RNA Nano 6000 chip (Agilent).	biotin	Illumina TotalPrep鈩?RNA Amplification Kit was used for cRNA synthesis.	9606	Illumina TotalPrep鈩?RNA Amplification Kit was used for cRNA synthesis.	Standard Illumina scanning protocol	SAMPLE 38	Genomestudio, quantile normalization	GPL6947	Yong-Min,,Huh	Yonsei University	50 Shinchon-ro	Seoul	120-749	South Korea	ftp://ftp.ncbi.nlm.nih.gov/geo/samples/GSM2235nnn/GSM2235593/suppl/GSM2235593_5455362025_K_Grn.idat.gz	48708
GSM2235595	Public on Mar 20 2018	Jul 14 2016	Mar 20 2018	RNA	1	Human gastric cancer	Homo sapiens	tissue: gastric cancer	age: 74	Sex: male	ptstage: T4	pnstage: N1	death: 1	duration overall survival: 15	total RNA	RecoverAll鈩?total nucleic acid isolation kit (Ambion) or the mirVana RNA Isolation Labeling Kit (Ambion) were used. Quality control was performed with NanoDrop 2000 (Thermo Fischer Scientific) and RNA Nano 6000 chip (Agilent).	biotin	Illumina TotalPrep鈩?RNA Amplification Kit was used for cRNA synthesis.	9606	Illumina TotalPrep鈩?RNA Amplification Kit was used for cRNA synthesis.	Standard Illumina scanning protocol	SAMPLE 40	Genomestudio, quantile normalization	GPL6947	Yong-Min,,Huh	Yonsei University	50 Shinchon-ro	Seoul	120-749	South Korea	ftp://ftp.ncbi.nlm.nih.gov/geo/samples/GSM2235nnn/GSM2235595/suppl/GSM2235595_5447354014_B_Grn.idat.gz	48708
GSM2235596	Public on Mar 20 2018	Jul 14 2016	Mar 20 2018	RNA	1	Human gastric cancer	Homo sapiens	tissue: gastric cancer	age: 63	Sex: male	ptstage: T3	pnstage: N1	death: 0	duration overall survival: 75	total RNA	RecoverAll鈩?total nucleic acid isolation kit (Ambion) or the mirVana RNA Isolation Labeling Kit (Ambion) were used. Quality control was performed with NanoDrop 2000 (Thermo Fischer Scientific) and RNA Nano 6000 chip (Agilent).	biotin	Illumina TotalPrep鈩?RNA Amplification Kit was used for cRNA synthesis.	9606	Illumina TotalPrep鈩?RNA Amplification Kit was used for cRNA synthesis.	Standard Illumina scanning protocol	SAMPLE 41	Genomestudio, quantile normalization	GPL6947	Yong-Min,,Huh	Yonsei University	50 Shinchon-ro	Seoul	120-749	South Korea	ftp://ftp.ncbi.nlm.nih.gov/geo/samples/GSM2235nnn/GSM2235596/suppl/GSM2235596_5447354014_C_Grn.idat.gz	48708
GSM2235597	Public on Mar 20 2018	Jul 14 2016	Mar 20 2018	RNA	1	Human gastric cancer	Homo sapiens	tissue: gastric cancer	age: 68	Sex: male	ptstage: T2	pnstage: N1	death: 0	duration overall survival: 84	total RNA	RecoverAll鈩?total nucleic acid isolation kit (Ambion) or the mirVana RNA Isolation Labeling Kit (Ambion) were used. Quality control was performed with NanoDrop 2000 (Thermo Fischer Scientific) and RNA Nano 6000 chip (Agilent).	biotin	Illumina TotalPrep鈩?RNA Amplification Kit was used for cRNA synthesis.	9606	Illumina TotalPrep鈩?RNA Amplification Kit was used for cRNA synthesis.	Standard Illumina scanning protocol	SAMPLE 42	Genomestudio, quantile normalization	GPL6947	Yong-Min,,Huh	Yonsei University	50 Shinchon-ro	Seoul	120-749	South Korea	ftp://ftp.ncbi.nlm.nih.gov/geo/samples/GSM2235nnn/GSM2235597/suppl/GSM2235597_5447354014_D_Grn.idat.gz	48708
GSM2235598	Public on Mar 20 2018	Jul 14 2016	Mar 20 2018	RNA	1	Human gastric cancer	Homo sapiens	tissue: gastric cancer	age: 74	Sex: male	ptstage: T3	pnstage: N1	death: 1	duration overall survival: 21	total RNA	RecoverAll鈩?total nucleic acid isolation kit (Ambion) or the mirVana RNA Isolation Labeling Kit (Ambion) were used. Quality control was performed with NanoDrop 2000 (Thermo Fischer Scientific) and RNA Nano 6000 chip (Agilent).	biotin	Illumina TotalPrep鈩?RNA Amplification Kit was used for cRNA synthesis.	9606	Illumina TotalPrep鈩?RNA Amplification Kit was used for cRNA synthesis.	Standard Illumina scanning protocol	SAMPLE 43	Genomestudio, quantile normalization	GPL6947	Yong-Min,,Huh	Yonsei University	50 Shinchon-ro	Seoul	120-749	South Korea	ftp://ftp.ncbi.nlm.nih.gov/geo/samples/GSM2235nnn/GSM2235598/suppl/GSM2235598_5447354014_E_Grn.idat.gz	48708
GSM2235599	Public on Mar 20 2018	Jul 14 2016	Mar 20 2018	RNA	1	Human gastric cancer	Homo sapiens	tissue: gastric cancer	age: 62	Sex: male	ptstage: T3	pnstage: N2	death: 0	duration overall survival: 80	total RNA	RecoverAll鈩?total nucleic acid isolation kit (Ambion) or the mirVana RNA Isolation Labeling Kit (Ambion) were used. Quality control was performed with NanoDrop 2000 (Thermo Fischer Scientific) and RNA Nano 6000 chip (Agilent).	biotin	Illumina TotalPrep鈩?RNA Amplification Kit was used for cRNA synthesis.	9606	Illumina TotalPrep鈩?RNA Amplification Kit was used for cRNA synthesis.	Standard Illumina scanning protocol	SAMPLE 44	Genomestudio, quantile normalization	GPL6947	Yong-Min,,Huh	Yonsei University	50 Shinchon-ro	Seoul	120-749	South Korea	ftp://ftp.ncbi.nlm.nih.gov/geo/samples/GSM2235nnn/GSM2235599/suppl/GSM2235599_5447354014_F_Grn.idat.gz	48708
GSM2235600	Public on Mar 20 2018	Jul 14 2016	Mar 20 2018	RNA	1	Human gastric cancer	Homo sapiens	tissue: gastric cancer	age: 53	Sex: male	ptstage: T4	pnstage: N2	death: 0	duration overall survival: 74	total RNA	RecoverAll鈩?total nucleic acid isolation kit (Ambion) or the mirVana RNA Isolation Labeling Kit (Ambion) were used. Quality control was performed with NanoDrop 2000 (Thermo Fischer Scientific) and RNA Nano 6000 chip (Agilent).	biotin	Illumina TotalPrep鈩?RNA Amplification Kit was used for cRNA synthesis.	9606	Illumina TotalPrep鈩?RNA Amplification Kit was used for cRNA synthesis.	Standard Illumina scanning protocol	SAMPLE 45	Genomestudio, quantile normalization	GPL6947	Yong-Min,,Huh	Yonsei University	50 Shinchon-ro	Seoul	120-749	South Korea	ftp://ftp.ncbi.nlm.nih.gov/geo/samples/GSM2235nnn/GSM2235600/suppl/GSM2235600_5447354014_G_Grn.idat.gz	48708
GSM2235601	Public on Mar 20 2018	Jul 14 2016	Mar 20 2018	RNA	1	Human gastric cancer	Homo sapiens	tissue: gastric cancer	age: 79	Sex: male	ptstage: T4	pnstage: N2	death: 0	duration overall survival: 74	total RNA	RecoverAll鈩?total nucleic acid isolation kit (Ambion) or the mirVana RNA Isolation Labeling Kit (Ambion) were used. Quality control was performed with NanoDrop 2000 (Thermo Fischer Scientific) and RNA Nano 6000 chip (Agilent).	biotin	Illumina TotalPrep鈩?RNA Amplification Kit was used for cRNA synthesis.	9606	Illumina TotalPrep鈩?RNA Amplification Kit was used for cRNA synthesis.	Standard Illumina scanning protocol	SAMPLE 46	Genomestudio, quantile normalization	GPL6947	Yong-Min,,Huh	Yonsei University	50 Shinchon-ro	Seoul	120-749	South Korea	ftp://ftp.ncbi.nlm.nih.gov/geo/samples/GSM2235nnn/GSM2235601/suppl/GSM2235601_5447354014_H_Grn.idat.gz	48708
GSM2235602	Public on Mar 20 2018	Jul 14 2016	Mar 20 2018	RNA	1	Human gastric cancer	Homo sapiens	tissue: gastric cancer	age: 61	Sex: female	ptstage: T3	pnstage: N1	death: 0	duration overall survival: 82	total RNA	RecoverAll鈩?total nucleic acid isolation kit (Ambion) or the mirVana RNA Isolation Labeling Kit (Ambion) were used. Quality control was performed with NanoDrop 2000 (Thermo Fischer Scientific) and RNA Nano 6000 chip (Agilent).	biotin	Illumina TotalPrep鈩?RNA Amplification Kit was used for cRNA synthesis.	9606	Illumina TotalPrep鈩?RNA Amplification Kit was used for cRNA synthesis.	Standard Illumina scanning protocol	SAMPLE 47	Genomestudio, quantile normalization	GPL6947	Yong-Min,,Huh	Yonsei University	50 Shinchon-ro	Seoul	120-749	South Korea	ftp://ftp.ncbi.nlm.nih.gov/geo/samples/GSM2235nnn/GSM2235602/suppl/GSM2235602_5447354014_I_Grn.idat.gz	48708
GSM2235603	Public on Mar 20 2018	Jul 14 2016	Mar 20 2018	RNA	1	Human gastric cancer	Homo sapiens	tissue: gastric cancer	age: 60	Sex: female	ptstage: T4	pnstage: N1	death: 0	duration overall survival: 80	total RNA	RecoverAll鈩?total nucleic acid isolation kit (Ambion) or the mirVana RNA Isolation Labeling Kit (Ambion) were used. Quality control was performed with NanoDrop 2000 (Thermo Fischer Scientific) and RNA Nano 6000 chip (Agilent).	biotin	Illumina TotalPrep鈩?RNA Amplification Kit was used for cRNA synthesis.	9606	Illumina TotalPrep鈩?RNA Amplification Kit was used for cRNA synthesis.	Standard Illumina scanning protocol	SAMPLE 48	Genomestudio, quantile normalization	GPL6947	Yong-Min,,Huh	Yonsei University	50 Shinchon-ro	Seoul	120-749	South Korea	ftp://ftp.ncbi.nlm.nih.gov/geo/samples/GSM2235nnn/GSM2235603/suppl/GSM2235603_5447354014_J_Grn.idat.gz	48708
GSM2235604	Public on Mar 20 2018	Jul 14 2016	Mar 20 2018	RNA	1	Human gastric cancer	Homo sapiens	tissue: gastric cancer	age: 75	Sex: male	ptstage: T3	pnstage: N1	death: 0	duration overall survival: 74	total RNA	RecoverAll鈩?total nucleic acid isolation kit (Ambion) or the mirVana RNA Isolation Labeling Kit (Ambion) were used. Quality control was performed with NanoDrop 2000 (Thermo Fischer Scientific) and RNA Nano 6000 chip (Agilent).	biotin	Illumina TotalPrep鈩?RNA Amplification Kit was used for cRNA synthesis.	9606	Illumina TotalPrep鈩?RNA Amplification Kit was used for cRNA synthesis.	Standard Illumina scanning protocol	SAMPLE 49	Genomestudio, quantile normalization	GPL6947	Yong-Min,,Huh	Yonsei University	50 Shinchon-ro	Seoul	120-749	South Korea	ftp://ftp.ncbi.nlm.nih.gov/geo/samples/GSM2235nnn/GSM2235604/suppl/GSM2235604_5447354014_K_Grn.idat.gz	48708
GSM2235605	Public on Mar 20 2018	Jul 14 2016	Mar 20 2018	RNA	1	Human gastric cancer	Homo sapiens	tissue: gastric cancer	age: 54	Sex: female	ptstage: T4	pnstage: N1	death: 1	duration overall survival: 67	total RNA	RecoverAll鈩?total nucleic acid isolation kit (Ambion) or the mirVana RNA Isolation Labeling Kit (Ambion) were used. Quality control was performed with NanoDrop 2000 (Thermo Fischer Scientific) and RNA Nano 6000 chip (Agilent).	biotin	Illumina TotalPrep鈩?RNA Amplification Kit was used for cRNA synthesis.	9606	Illumina TotalPrep鈩?RNA Amplification Kit was used for cRNA synthesis.	Standard Illumina scanning protocol	SAMPLE 50	Genomestudio, quantile normalization	GPL6947	Yong-Min,,Huh	Yonsei University	50 Shinchon-ro	Seoul	120-749	South Korea	ftp://ftp.ncbi.nlm.nih.gov/geo/samples/GSM2235nnn/GSM2235605/suppl/GSM2235605_5447354014_L_Grn.idat.gz	48708
GSM2235606	Public on Mar 20 2018	Jul 14 2016	Mar 20 2018	RNA	1	Human gastric cancer	Homo sapiens	tissue: gastric cancer	age: 38	Sex: male	ptstage: T4	pnstage: N2	death: 0	duration overall survival: 73	total RNA	RecoverAll鈩?total nucleic acid isolation kit (Ambion) or the mirVana RNA Isolation Labeling Kit (Ambion) were used. Quality control was performed with NanoDrop 2000 (Thermo Fischer Scientific) and RNA Nano 6000 chip (Agilent).	biotin	Illumina TotalPrep鈩?RNA Amplification Kit was used for cRNA synthesis.	9606	Illumina TotalPrep鈩?RNA Amplification Kit was used for cRNA synthesis.	Standard Illumina scanning protocol	SAMPLE 51	Genomestudio, quantile normalization	GPL6947	Yong-Min,,Huh	Yonsei University	50 Shinchon-ro	Seoul	120-749	South Korea	ftp://ftp.ncbi.nlm.nih.gov/geo/samples/GSM2235nnn/GSM2235606/suppl/GSM2235606_5447354038_B_Grn.idat.gz	48708
GSM2235607	Public on Mar 20 2018	Jul 14 2016	Mar 20 2018	RNA	1	Human gastric cancer	Homo sapiens	tissue: gastric cancer	age: 65	Sex: male	ptstage: T3	pnstage: N2	death: 1	duration overall survival: 6	total RNA	RecoverAll鈩?total nucleic acid isolation kit (Ambion) or the mirVana RNA Isolation Labeling Kit (Ambion) were used. Quality control was performed with NanoDrop 2000 (Thermo Fischer Scientific) and RNA Nano 6000 chip (Agilent).	biotin	Illumina TotalPrep鈩?RNA Amplification Kit was used for cRNA synthesis.	9606	Illumina TotalPrep鈩?RNA Amplification Kit was used for cRNA synthesis.	Standard Illumina scanning protocol	SAMPLE 52	Genomestudio, quantile normalization	GPL6947	Yong-Min,,Huh	Yonsei University	50 Shinchon-ro	Seoul	120-749	South Korea	ftp://ftp.ncbi.nlm.nih.gov/geo/samples/GSM2235nnn/GSM2235607/suppl/GSM2235607_5447354038_C_Grn.idat.gz	48708
GSM2235608	Public on Mar 20 2018	Jul 14 2016	Mar 20 2018	RNA	1	Human gastric cancer	Homo sapiens	tissue: gastric cancer	age: 55	Sex: male	ptstage: T3	pnstage: N1	death: 0	duration overall survival: 80	total RNA	RecoverAll鈩?total nucleic acid isolation kit (Ambion) or the mirVana RNA Isolation Labeling Kit (Ambion) were used. Quality control was performed with NanoDrop 2000 (Thermo Fischer Scientific) and RNA Nano 6000 chip (Agilent).	biotin	Illumina TotalPrep鈩?RNA Amplification Kit was used for cRNA synthesis.	9606	Illumina TotalPrep鈩?RNA Amplification Kit was used for cRNA synthesis.	Standard Illumina scanning protocol	SAMPLE 53	Genomestudio, quantile normalization	GPL6947	Yong-Min,,Huh	Yonsei University	50 Shinchon-ro	Seoul	120-749	South Korea	ftp://ftp.ncbi.nlm.nih.gov/geo/samples/GSM2235nnn/GSM2235608/suppl/GSM2235608_5447354038_D_Grn.idat.gz	48708
GSM2235609	Public on Mar 20 2018	Jul 14 2016	Mar 20 2018	RNA	1	Human gastric cancer	Homo sapiens	tissue: gastric cancer	age: 73	Sex: female	ptstage: T4	pnstage: N2	death: 1	duration overall survival: 8	total RNA	RecoverAll鈩?total nucleic acid isolation kit (Ambion) or the mirVana RNA Isolation Labeling Kit (Ambion) were used. Quality control was performed with NanoDrop 2000 (Thermo Fischer Scientific) and RNA Nano 6000 chip (Agilent).	biotin	Illumina TotalPrep鈩?RNA Amplification Kit was used for cRNA synthesis.	9606	Illumina TotalPrep鈩?RNA Amplification Kit was used for cRNA synthesis.	Standard Illumina scanning protocol	SAMPLE 54	Genomestudio, quantile normalization	GPL6947	Yong-Min,,Huh	Yonsei University	50 Shinchon-ro	Seoul	120-749	South Korea	ftp://ftp.ncbi.nlm.nih.gov/geo/samples/GSM2235nnn/GSM2235609/suppl/GSM2235609_5447354038_E_Grn.idat.gz	48708
GSM2235610	Public on Mar 20 2018	Jul 14 2016	Mar 20 2018	RNA	1	Human gastric cancer	Homo sapiens	tissue: gastric cancer	age: 76	Sex: male	ptstage: T4	pnstage: N2	death: 1	duration overall survival: 23	total RNA	RecoverAll鈩?total nucleic acid isolation kit (Ambion) or the mirVana RNA Isolation Labeling Kit (Ambion) were used. Quality control was performed with NanoDrop 2000 (Thermo Fischer Scientific) and RNA Nano 6000 chip (Agilent).	biotin	Illumina TotalPrep鈩?RNA Amplification Kit was used for cRNA synthesis.	9606	Illumina TotalPrep鈩?RNA Amplification Kit was used for cRNA synthesis.	Standard Illumina scanning protocol	SAMPLE 55	Genomestudio, quantile normalization	GPL6947	Yong-Min,,Huh	Yonsei University	50 Shinchon-ro	Seoul	120-749	South Korea	ftp://ftp.ncbi.nlm.nih.gov/geo/samples/GSM2235nnn/GSM2235610/suppl/GSM2235610_5447354038_F_Grn.idat.gz	48708
GSM2235611	Public on Mar 20 2018	Jul 14 2016	Mar 20 2018	RNA	1	Human gastric cancer	Homo sapiens	tissue: gastric cancer	age: 78	Sex: female	ptstage: T4	pnstage: N2	death: 1	duration overall survival: 8	total RNA	RecoverAll鈩?total nucleic acid isolation kit (Ambion) or the mirVana RNA Isolation Labeling Kit (Ambion) were used. Quality control was performed with NanoDrop 2000 (Thermo Fischer Scientific) and RNA Nano 6000 chip (Agilent).	biotin	Illumina TotalPrep鈩?RNA Amplification Kit was used for cRNA synthesis.	9606	Illumina TotalPrep鈩?RNA Amplification Kit was used for cRNA synthesis.	Standard Illumina scanning protocol	SAMPLE 56	Genomestudio, quantile normalization	GPL6947	Yong-Min,,Huh	Yonsei University	50 Shinchon-ro	Seoul	120-749	South Korea	ftp://ftp.ncbi.nlm.nih.gov/geo/samples/GSM2235nnn/GSM2235611/suppl/GSM2235611_5447354038_G_Grn.idat.gz	48708
GSM2235612	Public on Mar 20 2018	Jul 14 2016	Mar 20 2018	RNA	1	Human gastric cancer	Homo sapiens	tissue: gastric cancer	age: 69	Sex: male	ptstage: T4	pnstage: N2	death: 1	duration overall survival: 29	total RNA	RecoverAll鈩?total nucleic acid isolation kit (Ambion) or the mirVana RNA Isolation Labeling Kit (Ambion) were used. Quality control was performed with NanoDrop 2000 (Thermo Fischer Scientific) and RNA Nano 6000 chip (Agilent).	biotin	Illumina TotalPrep鈩?RNA Amplification Kit was used for cRNA synthesis.	9606	Illumina TotalPrep鈩?RNA Amplification Kit was used for cRNA synthesis.	Standard Illumina scanning protocol	SAMPLE 57	Genomestudio, quantile normalization	GPL6947	Yong-Min,,Huh	Yonsei University	50 Shinchon-ro	Seoul	120-749	South Korea	ftp://ftp.ncbi.nlm.nih.gov/geo/samples/GSM2235nnn/GSM2235612/suppl/GSM2235612_5447354038_H_Grn.idat.gz	48708
GSM2235613	Public on Mar 20 2018	Jul 14 2016	Mar 20 2018	RNA	1	Human gastric cancer	Homo sapiens	tissue: gastric cancer	age: 68	Sex: male	ptstage: T2	pnstage: N1	death: 0	duration overall survival: 83	total RNA	RecoverAll鈩?total nucleic acid isolation kit (Ambion) or the mirVana RNA Isolation Labeling Kit (Ambion) were used. Quality control was performed with NanoDrop 2000 (Thermo Fischer Scientific) and RNA Nano 6000 chip (Agilent).	biotin	Illumina TotalPrep鈩?RNA Amplification Kit was used for cRNA synthesis.	9606	Illumina TotalPrep鈩?RNA Amplification Kit was used for cRNA synthesis.	Standard Illumina scanning protocol	SAMPLE 58	Genomestudio, quantile normalization	GPL6947	Yong-Min,,Huh	Yonsei University	50 Shinchon-ro	Seoul	120-749	South Korea	ftp://ftp.ncbi.nlm.nih.gov/geo/samples/GSM2235nnn/GSM2235613/suppl/GSM2235613_5447354038_I_Grn.idat.gz	48708
GSM2235614	Public on Mar 20 2018	Jul 14 2016	Mar 20 2018	RNA	1	Human gastric cancer	Homo sapiens	tissue: gastric cancer	age: 27	Sex: male	ptstage: T4	pnstage: N2	death: 0	duration overall survival: 77	total RNA	RecoverAll鈩?total nucleic acid isolation kit (Ambion) or the mirVana RNA Isolation Labeling Kit (Ambion) were used. Quality control was performed with NanoDrop 2000 (Thermo Fischer Scientific) and RNA Nano 6000 chip (Agilent).	biotin	Illumina TotalPrep鈩?RNA Amplification Kit was used for cRNA synthesis.	9606	Illumina TotalPrep鈩?RNA Amplification Kit was used for cRNA synthesis.	Standard Illumina scanning protocol	SAMPLE 59	Genomestudio, quantile normalization	GPL6947	Yong-Min,,Huh	Yonsei University	50 Shinchon-ro	Seoul	120-749	South Korea	ftp://ftp.ncbi.nlm.nih.gov/geo/samples/GSM2235nnn/GSM2235614/suppl/GSM2235614_5447354038_J_Grn.idat.gz	48708
GSM2235615	Public on Mar 20 2018	Jul 14 2016	Mar 20 2018	RNA	1	Human gastric cancer	Homo sapiens	tissue: gastric cancer	age: 68	Sex: male	ptstage: T3	pnstage: N2	death: 0	duration overall survival: 77	total RNA	RecoverAll鈩?total nucleic acid isolation kit (Ambion) or the mirVana RNA Isolation Labeling Kit (Ambion) were used. Quality control was performed with NanoDrop 2000 (Thermo Fischer Scientific) and RNA Nano 6000 chip (Agilent).	biotin	Illumina TotalPrep鈩?RNA Amplification Kit was used for cRNA synthesis.	9606	Illumina TotalPrep鈩?RNA Amplification Kit was used for cRNA synthesis.	Standard Illumina scanning protocol	SAMPLE 60	Genomestudio, quantile normalization	GPL6947	Yong-Min,,Huh	Yonsei University	50 Shinchon-ro	Seoul	120-749	South Korea	ftp://ftp.ncbi.nlm.nih.gov/geo/samples/GSM2235nnn/GSM2235615/suppl/GSM2235615_5447354038_K_Grn.idat.gz	48708
GSM2235616	Public on Mar 20 2018	Jul 14 2016	Mar 20 2018	RNA	1	Human gastric cancer	Homo sapiens	tissue: gastric cancer	age: 73	Sex: male	ptstage: T4	pnstage: N1	death: 1	duration overall survival: 1	total RNA	RecoverAll鈩?total nucleic acid isolation kit (Ambion) or the mirVana RNA Isolation Labeling Kit (Ambion) were used. Quality control was performed with NanoDrop 2000 (Thermo Fischer Scientific) and RNA Nano 6000 chip (Agilent).	biotin	Illumina TotalPrep鈩?RNA Amplification Kit was used for cRNA synthesis.	9606	Illumina TotalPrep鈩?RNA Amplification Kit was used for cRNA synthesis.	Standard Illumina scanning protocol	SAMPLE 61	Genomestudio, quantile normalization	GPL6947	Yong-Min,,Huh	Yonsei University	50 Shinchon-ro	Seoul	120-749	South Korea	ftp://ftp.ncbi.nlm.nih.gov/geo/samples/GSM2235nnn/GSM2235616/suppl/GSM2235616_5447354038_L_Grn.idat.gz	48708
GSM2235617	Public on Mar 20 2018	Jul 14 2016	Mar 20 2018	RNA	1	Human gastric cancer	Homo sapiens	tissue: gastric cancer	age: 54	Sex: male	ptstage: T4	pnstage: N2	death: 0	duration overall survival: 71	total RNA	RecoverAll鈩?total nucleic acid isolation kit (Ambion) or the mirVana RNA Isolation Labeling Kit (Ambion) were used. Quality control was performed with NanoDrop 2000 (Thermo Fischer Scientific) and RNA Nano 6000 chip (Agilent).	biotin	Illumina TotalPrep鈩?RNA Amplification Kit was used for cRNA synthesis.	9606	Illumina TotalPrep鈩?RNA Amplification Kit was used for cRNA synthesis.	Standard Illumina scanning protocol	SAMPLE 62	Genomestudio, quantile normalization	GPL6947	Yong-Min,,Huh	Yonsei University	50 Shinchon-ro	Seoul	120-749	South Korea	ftp://ftp.ncbi.nlm.nih.gov/geo/samples/GSM2235nnn/GSM2235617/suppl/GSM2235617_5447354019_A_Grn.idat.gz	48708
GSM2235618	Public on Mar 20 2018	Jul 14 2016	Mar 20 2018	RNA	1	Human gastric cancer	Homo sapiens	tissue: gastric cancer	age: 73	Sex: female	ptstage: T4	pnstage: N2	death: 0	duration overall survival: 71	total RNA	RecoverAll鈩?total nucleic acid isolation kit (Ambion) or the mirVana RNA Isolation Labeling Kit (Ambion) were used. Quality control was performed with NanoDrop 2000 (Thermo Fischer Scientific) and RNA Nano 6000 chip (Agilent).	biotin	Illumina TotalPrep鈩?RNA Amplification Kit was used for cRNA synthesis.	9606	Illumina TotalPrep鈩?RNA Amplification Kit was used for cRNA synthesis.	Standard Illumina scanning protocol	SAMPLE 63	Genomestudio, quantile normalization	GPL6947	Yong-Min,,Huh	Yonsei University	50 Shinchon-ro	Seoul	120-749	South Korea	ftp://ftp.ncbi.nlm.nih.gov/geo/samples/GSM2235nnn/GSM2235618/suppl/GSM2235618_5447354019_B_Grn.idat.gz	48708
GSM2235619	Public on Mar 20 2018	Jul 14 2016	Mar 20 2018	RNA	1	Human gastric cancer	Homo sapiens	tissue: gastric cancer	age: 55	Sex: female	ptstage: T4	pnstage: N1	death: 0	duration overall survival: 70	total RNA	RecoverAll鈩?total nucleic acid isolation kit (Ambion) or the mirVana RNA Isolation Labeling Kit (Ambion) were used. Quality control was performed with NanoDrop 2000 (Thermo Fischer Scientific) and RNA Nano 6000 chip (Agilent).	biotin	Illumina TotalPrep鈩?RNA Amplification Kit was used for cRNA synthesis.	9606	Illumina TotalPrep鈩?RNA Amplification Kit was used for cRNA synthesis.	Standard Illumina scanning protocol	SAMPLE 64	Genomestudio, quantile normalization	GPL6947	Yong-Min,,Huh	Yonsei University	50 Shinchon-ro	Seoul	120-749	South Korea	ftp://ftp.ncbi.nlm.nih.gov/geo/samples/GSM2235nnn/GSM2235619/suppl/GSM2235619_5447354019_C_Grn.idat.gz	48708
GSM2235620	Public on Mar 20 2018	Jul 14 2016	Mar 20 2018	RNA	1	Human gastric cancer	Homo sapiens	tissue: gastric cancer	age: 65	Sex: male	ptstage: T3	pnstage: N2	death: 0	duration overall survival: 71	total RNA	RecoverAll鈩?total nucleic acid isolation kit (Ambion) or the mirVana RNA Isolation Labeling Kit (Ambion) were used. Quality control was performed with NanoDrop 2000 (Thermo Fischer Scientific) and RNA Nano 6000 chip (Agilent).	biotin	Illumina TotalPrep鈩?RNA Amplification Kit was used for cRNA synthesis.	9606	Illumina TotalPrep鈩?RNA Amplification Kit was used for cRNA synthesis.	Standard Illumina scanning protocol	SAMPLE 65	Genomestudio, quantile normalization	GPL6947	Yong-Min,,Huh	Yonsei University	50 Shinchon-ro	Seoul	120-749	South Korea	ftp://ftp.ncbi.nlm.nih.gov/geo/samples/GSM2235nnn/GSM2235620/suppl/GSM2235620_5447354019_D_Grn.idat.gz	48708
GSM2235621	Public on Mar 20 2018	Jul 14 2016	Mar 20 2018	RNA	1	Human gastric cancer	Homo sapiens	tissue: gastric cancer	age: 63	Sex: male	ptstage: T4	pnstage: N2	death: 1	duration overall survival: 33	total RNA	RecoverAll鈩?total nucleic acid isolation kit (Ambion) or the mirVana RNA Isolation Labeling Kit (Ambion) were used. Quality control was performed with NanoDrop 2000 (Thermo Fischer Scientific) and RNA Nano 6000 chip (Agilent).	biotin	Illumina TotalPrep鈩?RNA Amplification Kit was used for cRNA synthesis.	9606	Illumina TotalPrep鈩?RNA Amplification Kit was used for cRNA synthesis.	Standard Illumina scanning protocol	SAMPLE 66	Genomestudio, quantile normalization	GPL6947	Yong-Min,,Huh	Yonsei University	50 Shinchon-ro	Seoul	120-749	South Korea	ftp://ftp.ncbi.nlm.nih.gov/geo/samples/GSM2235nnn/GSM2235621/suppl/GSM2235621_5447354019_E_Grn.idat.gz	48708
GSM2235622	Public on Mar 20 2018	Jul 14 2016	Mar 20 2018	RNA	1	Human gastric cancer	Homo sapiens	tissue: gastric cancer	age: 50	Sex: male	ptstage: T3	pnstage: N2	death: 1	duration overall survival: 23	total RNA	RecoverAll鈩?total nucleic acid isolation kit (Ambion) or the mirVana RNA Isolation Labeling Kit (Ambion) were used. Quality control was performed with NanoDrop 2000 (Thermo Fischer Scientific) and RNA Nano 6000 chip (Agilent).	biotin	Illumina TotalPrep鈩?RNA Amplification Kit was used for cRNA synthesis.	9606	Illumina TotalPrep鈩?RNA Amplification Kit was used for cRNA synthesis.	Standard Illumina scanning protocol	SAMPLE 67	Genomestudio, quantile normalization	GPL6947	Yong-Min,,Huh	Yonsei University	50 Shinchon-ro	Seoul	120-749	South Korea	ftp://ftp.ncbi.nlm.nih.gov/geo/samples/GSM2235nnn/GSM2235622/suppl/GSM2235622_5447354019_F_Grn.idat.gz	48708
GSM2235623	Public on Mar 20 2018	Jul 14 2016	Mar 20 2018	RNA	1	Human gastric cancer	Homo sapiens	tissue: gastric cancer	age: 56	Sex: male	ptstage: T3	pnstage: N1	death: 1	duration overall survival: 21	total RNA	RecoverAll鈩?total nucleic acid isolation kit (Ambion) or the mirVana RNA Isolation Labeling Kit (Ambion) were used. Quality control was performed with NanoDrop 2000 (Thermo Fischer Scientific) and RNA Nano 6000 chip (Agilent).	biotin	Illumina TotalPrep鈩?RNA Amplification Kit was used for cRNA synthesis.	9606	Illumina TotalPrep鈩?RNA Amplification Kit was used for cRNA synthesis.	Standard Illumina scanning protocol	SAMPLE 68	Genomestudio, quantile normalization	GPL6947	Yong-Min,,Huh	Yonsei University	50 Shinchon-ro	Seoul	120-749	South Korea	ftp://ftp.ncbi.nlm.nih.gov/geo/samples/GSM2235nnn/GSM2235623/suppl/GSM2235623_5447354019_G_Grn.idat.gz	48708
GSM2235624	Public on Mar 20 2018	Jul 14 2016	Mar 20 2018	RNA	1	Human gastric cancer	Homo sapiens	tissue: gastric cancer	age: 59	Sex: male	ptstage: T3	pnstage: N1	death: 0	duration overall survival: 77	total RNA	RecoverAll鈩?total nucleic acid isolation kit (Ambion) or the mirVana RNA Isolation Labeling Kit (Ambion) were used. Quality control was performed with NanoDrop 2000 (Thermo Fischer Scientific) and RNA Nano 6000 chip (Agilent).	biotin	Illumina TotalPrep鈩?RNA Amplification Kit was used for cRNA synthesis.	9606	Illumina TotalPrep鈩?RNA Amplification Kit was used for cRNA synthesis.	Standard Illumina scanning protocol	SAMPLE 69	Genomestudio, quantile normalization	GPL6947	Yong-Min,,Huh	Yonsei University	50 Shinchon-ro	Seoul	120-749	South Korea	ftp://ftp.ncbi.nlm.nih.gov/geo/samples/GSM2235nnn/GSM2235624/suppl/GSM2235624_5447354019_H_Grn.idat.gz	48708
GSM2235625	Public on Mar 20 2018	Jul 14 2016	Mar 20 2018	RNA	1	Human gastric cancer	Homo sapiens	tissue: gastric cancer	age: 53	Sex: female	ptstage: T4	pnstage: N0	death: 0	duration overall survival: 70	total RNA	RecoverAll鈩?total nucleic acid isolation kit (Ambion) or the mirVana RNA Isolation Labeling Kit (Ambion) were used. Quality control was performed with NanoDrop 2000 (Thermo Fischer Scientific) and RNA Nano 6000 chip (Agilent).	biotin	Illumina TotalPrep鈩?RNA Amplification Kit was used for cRNA synthesis.	9606	Illumina TotalPrep鈩?RNA Amplification Kit was used for cRNA synthesis.	Standard Illumina scanning protocol	SAMPLE 70	Genomestudio, quantile normalization	GPL6947	Yong-Min,,Huh	Yonsei University	50 Shinchon-ro	Seoul	120-749	South Korea	ftp://ftp.ncbi.nlm.nih.gov/geo/samples/GSM2235nnn/GSM2235625/suppl/GSM2235625_5447354019_I_Grn.idat.gz	48708
GSM2235626	Public on Mar 20 2018	Jul 14 2016	Mar 20 2018	RNA	1	Human gastric cancer	Homo sapiens	tissue: gastric cancer	age: 46	Sex: male	ptstage: T4	pnstage: N2	death: 0	duration overall survival: 77	total RNA	RecoverAll鈩?total nucleic acid isolation kit (Ambion) or the mirVana RNA Isolation Labeling Kit (Ambion) were used. Quality control was performed with NanoDrop 2000 (Thermo Fischer Scientific) and RNA Nano 6000 chip (Agilent).	biotin	Illumina TotalPrep鈩?RNA Amplification Kit was used for cRNA synthesis.	9606	Illumina TotalPrep鈩?RNA Amplification Kit was used for cRNA synthesis.	Standard Illumina scanning protocol	SAMPLE 71	Genomestudio, quantile normalization	GPL6947	Yong-Min,,Huh	Yonsei University	50 Shinchon-ro	Seoul	120-749	South Korea	ftp://ftp.ncbi.nlm.nih.gov/geo/samples/GSM2235nnn/GSM2235626/suppl/GSM2235626_5447354019_K_Grn.idat.gz	48708
GSM2235627	Public on Mar 20 2018	Jul 14 2016	Mar 20 2018	RNA	1	Human gastric cancer	Homo sapiens	tissue: gastric cancer	age: 68	Sex: male	ptstage: T3	pnstage: N1	death: 0	duration overall survival: 70	total RNA	RecoverAll鈩?total nucleic acid isolation kit (Ambion) or the mirVana RNA Isolation Labeling Kit (Ambion) were used. Quality control was performed with NanoDrop 2000 (Thermo Fischer Scientific) and RNA Nano 6000 chip (Agilent).	biotin	Illumina TotalPrep鈩?RNA Amplification Kit was used for cRNA synthesis.	9606	Illumina TotalPrep鈩?RNA Amplification Kit was used for cRNA synthesis.	Standard Illumina scanning protocol	SAMPLE 72	Genomestudio, quantile normalization	GPL6947	Yong-Min,,Huh	Yonsei University	50 Shinchon-ro	Seoul	120-749	South Korea	ftp://ftp.ncbi.nlm.nih.gov/geo/samples/GSM2235nnn/GSM2235627/suppl/GSM2235627_5447354024_A_Grn.idat.gz	48708
GSM2235628	Public on Mar 20 2018	Jul 14 2016	Mar 20 2018	RNA	1	Human gastric cancer	Homo sapiens	tissue: gastric cancer	age: 43	Sex: male	ptstage: T3	pnstage: N1	death: 0	duration overall survival: 74	total RNA	RecoverAll鈩?total nucleic acid isolation kit (Ambion) or the mirVana RNA Isolation Labeling Kit (Ambion) were used. Quality control was performed with NanoDrop 2000 (Thermo Fischer Scientific) and RNA Nano 6000 chip (Agilent).	biotin	Illumina TotalPrep鈩?RNA Amplification Kit was used for cRNA synthesis.	9606	Illumina TotalPrep鈩?RNA Amplification Kit was used for cRNA synthesis.	Standard Illumina scanning protocol	SAMPLE 73	Genomestudio, quantile normalization	GPL6947	Yong-Min,,Huh	Yonsei University	50 Shinchon-ro	Seoul	120-749	South Korea	ftp://ftp.ncbi.nlm.nih.gov/geo/samples/GSM2235nnn/GSM2235628/suppl/GSM2235628_5447354024_B_Grn.idat.gz	48708
GSM2235629	Public on Mar 20 2018	Jul 14 2016	Mar 20 2018	RNA	1	Human gastric cancer	Homo sapiens	tissue: gastric cancer	age: 78	Sex: male	ptstage: T4	pnstage: N1	death: 1	duration overall survival: 36	total RNA	RecoverAll鈩?total nucleic acid isolation kit (Ambion) or the mirVana RNA Isolation Labeling Kit (Ambion) were used. Quality control was performed with NanoDrop 2000 (Thermo Fischer Scientific) and RNA Nano 6000 chip (Agilent).	biotin	Illumina TotalPrep鈩?RNA Amplification Kit was used for cRNA synthesis.	9606	Illumina TotalPrep鈩?RNA Amplification Kit was used for cRNA synthesis.	Standard Illumina scanning protocol	SAMPLE 74	Genomestudio, quantile normalization	GPL6947	Yong-Min,,Huh	Yonsei University	50 Shinchon-ro	Seoul	120-749	South Korea	ftp://ftp.ncbi.nlm.nih.gov/geo/samples/GSM2235nnn/GSM2235629/suppl/GSM2235629_5447354024_C_Grn.idat.gz	48708
GSM2235630	Public on Mar 20 2018	Jul 14 2016	Mar 20 2018	RNA	1	Human gastric cancer	Homo sapiens	tissue: gastric cancer	age: 65	Sex: male	ptstage: T4	pnstage: N1	death: 0	duration overall survival: 70	total RNA	RecoverAll鈩?total nucleic acid isolation kit (Ambion) or the mirVana RNA Isolation Labeling Kit (Ambion) were used. Quality control was performed with NanoDrop 2000 (Thermo Fischer Scientific) and RNA Nano 6000 chip (Agilent).	biotin	Illumina TotalPrep鈩?RNA Amplification Kit was used for cRNA synthesis.	9606	Illumina TotalPrep鈩?RNA Amplification Kit was used for cRNA synthesis.	Standard Illumina scanning protocol	SAMPLE 75	Genomestudio, quantile normalization	GPL6947	Yong-Min,,Huh	Yonsei University	50 Shinchon-ro	Seoul	120-749	South Korea	ftp://ftp.ncbi.nlm.nih.gov/geo/samples/GSM2235nnn/GSM2235630/suppl/GSM2235630_5447354024_D_Grn.idat.gz	48708
GSM2235631	Public on Mar 20 2018	Jul 14 2016	Mar 20 2018	RNA	1	Human gastric cancer	Homo sapiens	tissue: gastric cancer	age: 66	Sex: female	ptstage: T4	pnstage: N0	death: 0	duration overall survival: 69	total RNA	RecoverAll鈩?total nucleic acid isolation kit (Ambion) or the mirVana RNA Isolation Labeling Kit (Ambion) were used. Quality control was performed with NanoDrop 2000 (Thermo Fischer Scientific) and RNA Nano 6000 chip (Agilent).	biotin	Illumina TotalPrep鈩?RNA Amplification Kit was used for cRNA synthesis.	9606	Illumina TotalPrep鈩?RNA Amplification Kit was used for cRNA synthesis.	Standard Illumina scanning protocol	SAMPLE 76	Genomestudio, quantile normalization	GPL6947	Yong-Min,,Huh	Yonsei University	50 Shinchon-ro	Seoul	120-749	South Korea	ftp://ftp.ncbi.nlm.nih.gov/geo/samples/GSM2235nnn/GSM2235631/suppl/GSM2235631_5447354024_E_Grn.idat.gz	48708
GSM2235632	Public on Mar 20 2018	Jul 14 2016	Mar 20 2018	RNA	1	Human gastric cancer	Homo sapiens	tissue: gastric cancer	age: 60	Sex: male	ptstage: T3	pnstage: N1	death: 0	duration overall survival: 76	total RNA	RecoverAll鈩?total nucleic acid isolation kit (Ambion) or the mirVana RNA Isolation Labeling Kit (Ambion) were used. Quality control was performed with NanoDrop 2000 (Thermo Fischer Scientific) and RNA Nano 6000 chip (Agilent).	biotin	Illumina TotalPrep鈩?RNA Amplification Kit was used for cRNA synthesis.	9606	Illumina TotalPrep鈩?RNA Amplification Kit was used for cRNA synthesis.	Standard Illumina scanning protocol	SAMPLE 77	Genomestudio, quantile normalization	GPL6947	Yong-Min,,Huh	Yonsei University	50 Shinchon-ro	Seoul	120-749	South Korea	ftp://ftp.ncbi.nlm.nih.gov/geo/samples/GSM2235nnn/GSM2235632/suppl/GSM2235632_5447354024_F_Grn.idat.gz	48708
GSM2235633	Public on Mar 20 2018	Jul 14 2016	Mar 20 2018	RNA	1	Human gastric cancer	Homo sapiens	tissue: gastric cancer	age: 63	Sex: male	ptstage: T4	pnstage: N2	death: 1	duration overall survival: 17	total RNA	RecoverAll鈩?total nucleic acid isolation kit (Ambion) or the mirVana RNA Isolation Labeling Kit (Ambion) were used. Quality control was performed with NanoDrop 2000 (Thermo Fischer Scientific) and RNA Nano 6000 chip (Agilent).	biotin	Illumina TotalPrep鈩?RNA Amplification Kit was used for cRNA synthesis.	9606	Illumina TotalPrep鈩?RNA Amplification Kit was used for cRNA synthesis.	Standard Illumina scanning protocol	SAMPLE 78	Genomestudio, quantile normalization	GPL6947	Yong-Min,,Huh	Yonsei University	50 Shinchon-ro	Seoul	120-749	South Korea	ftp://ftp.ncbi.nlm.nih.gov/geo/samples/GSM2235nnn/GSM2235633/suppl/GSM2235633_5447354024_G_Grn.idat.gz	48708
GSM2235634	Public on Mar 20 2018	Jul 14 2016	Mar 20 2018	RNA	1	Human gastric cancer	Homo sapiens	tissue: gastric cancer	age: 64	Sex: female	ptstage: T4	pnstage: N1	death: 0	duration overall survival: 74	total RNA	RecoverAll鈩?total nucleic acid isolation kit (Ambion) or the mirVana RNA Isolation Labeling Kit (Ambion) were used. Quality control was performed with NanoDrop 2000 (Thermo Fischer Scientific) and RNA Nano 6000 chip (Agilent).	biotin	Illumina TotalPrep鈩?RNA Amplification Kit was used for cRNA synthesis.	9606	Illumina TotalPrep鈩?RNA Amplification Kit was used for cRNA synthesis.	Standard Illumina scanning protocol	SAMPLE 79	Genomestudio, quantile normalization	GPL6947	Yong-Min,,Huh	Yonsei University	50 Shinchon-ro	Seoul	120-749	South Korea	ftp://ftp.ncbi.nlm.nih.gov/geo/samples/GSM2235nnn/GSM2235634/suppl/GSM2235634_5447354024_H_Grn.idat.gz	48708
GSM2235635	Public on Mar 20 2018	Jul 14 2016	Mar 20 2018	RNA	1	Human gastric cancer	Homo sapiens	tissue: gastric cancer	age: 73	Sex: male	ptstage: T2	pnstage: N2	death: 0	duration overall survival: 72	total RNA	RecoverAll鈩?total nucleic acid isolation kit (Ambion) or the mirVana RNA Isolation Labeling Kit (Ambion) were used. Quality control was performed with NanoDrop 2000 (Thermo Fischer Scientific) and RNA Nano 6000 chip (Agilent).	biotin	Illumina TotalPrep鈩?RNA Amplification Kit was used for cRNA synthesis.	9606	Illumina TotalPrep鈩?RNA Amplification Kit was used for cRNA synthesis.	Standard Illumina scanning protocol	SAMPLE 80	Genomestudio, quantile normalization	GPL6947	Yong-Min,,Huh	Yonsei University	50 Shinchon-ro	Seoul	120-749	South Korea	ftp://ftp.ncbi.nlm.nih.gov/geo/samples/GSM2235nnn/GSM2235635/suppl/GSM2235635_5447354024_J_Grn.idat.gz	48708
GSM2235636	Public on Mar 20 2018	Jul 14 2016	Mar 20 2018	RNA	1	Human gastric cancer	Homo sapiens	tissue: gastric cancer	age: 32	Sex: female	ptstage: T4	pnstage: N2	death: 0	duration overall survival: 69	total RNA	RecoverAll鈩?total nucleic acid isolation kit (Ambion) or the mirVana RNA Isolation Labeling Kit (Ambion) were used. Quality control was performed with NanoDrop 2000 (Thermo Fischer Scientific) and RNA Nano 6000 chip (Agilent).	biotin	Illumina TotalPrep鈩?RNA Amplification Kit was used for cRNA synthesis.	9606	Illumina TotalPrep鈩?RNA Amplification Kit was used for cRNA synthesis.	Standard Illumina scanning protocol	SAMPLE 81	Genomestudio, quantile normalization	GPL6947	Yong-Min,,Huh	Yonsei University	50 Shinchon-ro	Seoul	120-749	South Korea	ftp://ftp.ncbi.nlm.nih.gov/geo/samples/GSM2235nnn/GSM2235636/suppl/GSM2235636_5447354024_K_Grn.idat.gz	48708
GSM2235637	Public on Mar 20 2018	Jul 14 2016	Mar 20 2018	RNA	1	Human gastric cancer	Homo sapiens	tissue: gastric cancer	age: 75	Sex: female	ptstage: T4	pnstage: N0	death: 0	duration overall survival: 68	total RNA	RecoverAll鈩?total nucleic acid isolation kit (Ambion) or the mirVana RNA Isolation Labeling Kit (Ambion) were used. Quality control was performed with NanoDrop 2000 (Thermo Fischer Scientific) and RNA Nano 6000 chip (Agilent).	biotin	Illumina TotalPrep鈩?RNA Amplification Kit was used for cRNA synthesis.	9606	Illumina TotalPrep鈩?RNA Amplification Kit was used for cRNA synthesis.	Standard Illumina scanning protocol	SAMPLE 82	Genomestudio, quantile normalization	GPL6947	Yong-Min,,Huh	Yonsei University	50 Shinchon-ro	Seoul	120-749	South Korea	ftp://ftp.ncbi.nlm.nih.gov/geo/samples/GSM2235nnn/GSM2235637/suppl/GSM2235637_5447354024_L_Grn.idat.gz	48708
GSM2235695	Public on Mar 20 2018	Jul 14 2016	Mar 20 2018	RNA	1	Human gastric cancer	Homo sapiens	tissue: gastric cancer	age: 42	Sex: female	ptstage: T4	pnstage: N1	death: 0	duration overall survival: 121	total RNA	RecoverAll鈩?total nucleic acid isolation kit (Ambion) or the mirVana RNA Isolation Labeling Kit (Ambion) were used. Quality control was performed with NanoDrop 2000 (Thermo Fischer Scientific) and RNA Nano 6000 chip (Agilent).	biotin	Illumina TotalPrep鈩?RNA Amplification Kit was used for synthesis of labeled cRNA.	9606	HumanHT-12 v3.0 Expression BeadChip array (Illumina) was used.	Standard Illumina scanning protocol	SAMPLE 1	Genomestudio, quantile normalization	GPL6947	Yong-Min,,Huh	Yonsei University	50 Shinchon-ro	Seoul	120-749	South Korea	ftp://ftp.ncbi.nlm.nih.gov/geo/samples/GSM2235nnn/GSM2235695/suppl/GSM2235695_4961941037_C_Grn.idat.gz	48708
GSM2235696	Public on Mar 20 2018	Jul 14 2016	Mar 20 2018	RNA	1	Human gastric cancer	Homo sapiens	tissue: gastric cancer	age: 60	Sex: male	ptstage: T4	pnstage: N1	death: 0	duration overall survival: 108	total RNA	RecoverAll鈩?total nucleic acid isolation kit (Ambion) or the mirVana RNA Isolation Labeling Kit (Ambion) were used. Quality control was performed with NanoDrop 2000 (Thermo Fischer Scientific) and RNA Nano 6000 chip (Agilent).	biotin	Illumina TotalPrep鈩?RNA Amplification Kit was used for synthesis of labeled cRNA.	9606	HumanHT-12 v3.0 Expression BeadChip array (Illumina) was used.	Standard Illumina scanning protocol	SAMPLE 2	Genomestudio, quantile normalization	GPL6947	Yong-Min,,Huh	Yonsei University	50 Shinchon-ro	Seoul	120-749	South Korea	ftp://ftp.ncbi.nlm.nih.gov/geo/samples/GSM2235nnn/GSM2235696/suppl/GSM2235696_5050509006_A_Grn.idat.gz	48708
GSM2235697	Public on Mar 20 2018	Jul 14 2016	Mar 20 2018	RNA	1	Human gastric cancer	Homo sapiens	tissue: gastric cancer	age: 49	Sex: male	ptstage: T3	pnstage: N0	death: 1	duration overall survival: 39	total RNA	RecoverAll鈩?total nucleic acid isolation kit (Ambion) or the mirVana RNA Isolation Labeling Kit (Ambion) were used. Quality control was performed with NanoDrop 2000 (Thermo Fischer Scientific) and RNA Nano 6000 chip (Agilent).	biotin	Illumina TotalPrep鈩?RNA Amplification Kit was used for synthesis of labeled cRNA.	9606	HumanHT-12 v3.0 Expression BeadChip array (Illumina) was used.	Standard Illumina scanning protocol	SAMPLE 3	Genomestudio, quantile normalization	GPL6947	Yong-Min,,Huh	Yonsei University	50 Shinchon-ro	Seoul	120-749	South Korea	ftp://ftp.ncbi.nlm.nih.gov/geo/samples/GSM2235nnn/GSM2235697/suppl/GSM2235697_5050509006_C_Grn.idat.gz	48708
GSM2235698	Public on Mar 20 2018	Jul 14 2016	Mar 20 2018	RNA	1	Human gastric cancer	Homo sapiens	tissue: gastric cancer	age: 34	Sex: male	ptstage: T3	pnstage: N3	death: 1	duration overall survival: 23	total RNA	RecoverAll鈩?total nucleic acid isolation kit (Ambion) or the mirVana RNA Isolation Labeling Kit (Ambion) were used. Quality control was performed with NanoDrop 2000 (Thermo Fischer Scientific) and RNA Nano 6000 chip (Agilent).	biotin	Illumina TotalPrep鈩?RNA Amplification Kit was used for synthesis of labeled cRNA.	9606	HumanHT-12 v3.0 Expression BeadChip array (Illumina) was used.	Standard Illumina scanning protocol	SAMPLE 4	Genomestudio, quantile normalization	GPL6947	Yong-Min,,Huh	Yonsei University	50 Shinchon-ro	Seoul	120-749	South Korea	ftp://ftp.ncbi.nlm.nih.gov/geo/samples/GSM2235nnn/GSM2235698/suppl/GSM2235698_5050509006_D_Grn.idat.gz	48708
GSM2235699	Public on Mar 20 2018	Jul 14 2016	Mar 20 2018	RNA	1	Human gastric cancer	Homo sapiens	tissue: gastric cancer	age: 68	Sex: male	ptstage: T4	pnstage: N3	death: 1	duration overall survival: 23	total RNA	RecoverAll鈩?total nucleic acid isolation kit (Ambion) or the mirVana RNA Isolation Labeling Kit (Ambion) were used. Quality control was performed with NanoDrop 2000 (Thermo Fischer Scientific) and RNA Nano 6000 chip (Agilent).	biotin	Illumina TotalPrep鈩?RNA Amplification Kit was used for synthesis of labeled cRNA.	9606	HumanHT-12 v3.0 Expression BeadChip array (Illumina) was used.	Standard Illumina scanning protocol	SAMPLE 5	Genomestudio, quantile normalization	GPL6947	Yong-Min,,Huh	Yonsei University	50 Shinchon-ro	Seoul	120-749	South Korea	ftp://ftp.ncbi.nlm.nih.gov/geo/samples/GSM2235nnn/GSM2235699/suppl/GSM2235699_5050509006_E_Grn.idat.gz	48708
GSM2235700	Public on Mar 20 2018	Jul 14 2016	Mar 20 2018	RNA	1	Human gastric cancer	Homo sapiens	tissue: gastric cancer	age: 59	Sex: male	ptstage: T4	pnstage: N2	death: 0	duration overall survival: 117	total RNA	RecoverAll鈩?total nucleic acid isolation kit (Ambion) or the mirVana RNA Isolation Labeling Kit (Ambion) were used. Quality control was performed with NanoDrop 2000 (Thermo Fischer Scientific) and RNA Nano 6000 chip (Agilent).	biotin	Illumina TotalPrep鈩?RNA Amplification Kit was used for synthesis of labeled cRNA.	9606	HumanHT-12 v3.0 Expression BeadChip array (Illumina) was used.	Standard Illumina scanning protocol	SAMPLE 6	Genomestudio, quantile normalization	GPL6947	Yong-Min,,Huh	Yonsei University	50 Shinchon-ro	Seoul	120-749	South Korea	ftp://ftp.ncbi.nlm.nih.gov/geo/samples/GSM2235nnn/GSM2235700/suppl/GSM2235700_5050509006_F_Grn.idat.gz	48708
GSM2235701	Public on Mar 20 2018	Jul 14 2016	Mar 20 2018	RNA	1	Human gastric cancer	Homo sapiens	tissue: gastric cancer	age: 61	Sex: male	ptstage: T3	pnstage: N0	death: 0	duration overall survival: 108	total RNA	RecoverAll鈩?total nucleic acid isolation kit (Ambion) or the mirVana RNA Isolation Labeling Kit (Ambion) were used. Quality control was performed with NanoDrop 2000 (Thermo Fischer Scientific) and RNA Nano 6000 chip (Agilent).	biotin	Illumina TotalPrep鈩?RNA Amplification Kit was used for synthesis of labeled cRNA.	9606	HumanHT-12 v3.0 Expression BeadChip array (Illumina) was used.	Standard Illumina scanning protocol	SAMPLE 7	Genomestudio, quantile normalization	GPL6947	Yong-Min,,Huh	Yonsei University	50 Shinchon-ro	Seoul	120-749	South Korea	ftp://ftp.ncbi.nlm.nih.gov/geo/samples/GSM2235nnn/GSM2235701/suppl/GSM2235701_5050509006_G_Grn.idat.gz	48708
GSM2235702	Public on Mar 20 2018	Jul 14 2016	Mar 20 2018	RNA	1	Human gastric cancer	Homo sapiens	tissue: gastric cancer	age: 74	Sex: female	ptstage: T4	pnstage: N1	death: 1	duration overall survival: 18	total RNA	RecoverAll鈩?total nucleic acid isolation kit (Ambion) or the mirVana RNA Isolation Labeling Kit (Ambion) were used. Quality control was performed with NanoDrop 2000 (Thermo Fischer Scientific) and RNA Nano 6000 chip (Agilent).	biotin	Illumina TotalPrep鈩?RNA Amplification Kit was used for synthesis of labeled cRNA.	9606	HumanHT-12 v3.0 Expression BeadChip array (Illumina) was used.	Standard Illumina scanning protocol	SAMPLE 8	Genomestudio, quantile normalization	GPL6947	Yong-Min,,Huh	Yonsei University	50 Shinchon-ro	Seoul	120-749	South Korea	ftp://ftp.ncbi.nlm.nih.gov/geo/samples/GSM2235nnn/GSM2235702/suppl/GSM2235702_5050509006_H_Grn.idat.gz	48708
GSM2235703	Public on Mar 20 2018	Jul 14 2016	Mar 20 2018	RNA	1	Human gastric cancer	Homo sapiens	tissue: gastric cancer	age: 35	Sex: male	ptstage: T4	pnstage: N2	death: 1	duration overall survival: 43	total RNA	RecoverAll鈩?total nucleic acid isolation kit (Ambion) or the mirVana RNA Isolation Labeling Kit (Ambion) were used. Quality control was performed with NanoDrop 2000 (Thermo Fischer Scientific) and RNA Nano 6000 chip (Agilent).	biotin	Illumina TotalPrep鈩?RNA Amplification Kit was used for synthesis of labeled cRNA.	9606	HumanHT-12 v3.0 Expression BeadChip array (Illumina) was used.	Standard Illumina scanning protocol	SAMPLE 9	Genomestudio, quantile normalization	GPL6947	Yong-Min,,Huh	Yonsei University	50 Shinchon-ro	Seoul	120-749	South Korea	ftp://ftp.ncbi.nlm.nih.gov/geo/samples/GSM2235nnn/GSM2235703/suppl/GSM2235703_5050509006_I_Grn.idat.gz	48708
GSM2235704	Public on Mar 20 2018	Jul 14 2016	Mar 20 2018	RNA	1	Human gastric cancer	Homo sapiens	tissue: gastric cancer	age: 53	Sex: female	ptstage: T4	pnstage: N1	death: 0	duration overall survival: 109	total RNA	RecoverAll鈩?total nucleic acid isolation kit (Ambion) or the mirVana RNA Isolation Labeling Kit (Ambion) were used. Quality control was performed with NanoDrop 2000 (Thermo Fischer Scientific) and RNA Nano 6000 chip (Agilent).	biotin	Illumina TotalPrep鈩?RNA Amplification Kit was used for synthesis of labeled cRNA.	9606	HumanHT-12 v3.0 Expression BeadChip array (Illumina) was used.	Standard Illumina scanning protocol	SAMPLE 10	Genomestudio, quantile normalization	GPL6947	Yong-Min,,Huh	Yonsei University	50 Shinchon-ro	Seoul	120-749	South Korea	ftp://ftp.ncbi.nlm.nih.gov/geo/samples/GSM2235nnn/GSM2235704/suppl/GSM2235704_5050509006_J_Grn.idat.gz	48708
GSM2235705	Public on Mar 20 2018	Jul 14 2016	Mar 20 2018	RNA	1	Human gastric cancer	Homo sapiens	tissue: gastric cancer	age: 67	Sex: male	ptstage: T4	pnstage: N1	death: 0	duration overall survival: 114	total RNA	RecoverAll鈩?total nucleic acid isolation kit (Ambion) or the mirVana RNA Isolation Labeling Kit (Ambion) were used. Quality control was performed with NanoDrop 2000 (Thermo Fischer Scientific) and RNA Nano 6000 chip (Agilent).	biotin	Illumina TotalPrep鈩?RNA Amplification Kit was used for synthesis of labeled cRNA.	9606	HumanHT-12 v3.0 Expression BeadChip array (Illumina) was used.	Standard Illumina scanning protocol	SAMPLE 11	Genomestudio, quantile normalization	GPL6947	Yong-Min,,Huh	Yonsei University	50 Shinchon-ro	Seoul	120-749	South Korea	ftp://ftp.ncbi.nlm.nih.gov/geo/samples/GSM2235nnn/GSM2235705/suppl/GSM2235705_5050509006_K_Grn.idat.gz	48708
GSM2235706	Public on Mar 20 2018	Jul 14 2016	Mar 20 2018	RNA	1	Human gastric cancer	Homo sapiens	tissue: gastric cancer	age: 71	Sex: male	ptstage: T4	pnstage: N2	death: 1	duration overall survival: 2	total RNA	RecoverAll鈩?total nucleic acid isolation kit (Ambion) or the mirVana RNA Isolation Labeling Kit (Ambion) were used. Quality control was performed with NanoDrop 2000 (Thermo Fischer Scientific) and RNA Nano 6000 chip (Agilent).	biotin	Illumina TotalPrep鈩?RNA Amplification Kit was used for synthesis of labeled cRNA.	9606	HumanHT-12 v3.0 Expression BeadChip array (Illumina) was used.	Standard Illumina scanning protocol	SAMPLE 12	Genomestudio, quantile normalization	GPL6947	Yong-Min,,Huh	Yonsei University	50 Shinchon-ro	Seoul	120-749	South Korea	ftp://ftp.ncbi.nlm.nih.gov/geo/samples/GSM2235nnn/GSM2235706/suppl/GSM2235706_5050509006_L_Grn.idat.gz	48708
GSM2235707	Public on Mar 20 2018	Jul 14 2016	Mar 20 2018	RNA	1	Human gastric cancer	Homo sapiens	tissue: gastric cancer	age: 63	Sex: female	ptstage: T2	pnstage: N1	death: 0	duration overall survival: 116	total RNA	RecoverAll鈩?total nucleic acid isolation kit (Ambion) or the mirVana RNA Isolation Labeling Kit (Ambion) were used. Quality control was performed with NanoDrop 2000 (Thermo Fischer Scientific) and RNA Nano 6000 chip (Agilent).	biotin	Illumina TotalPrep鈩?RNA Amplification Kit was used for synthesis of labeled cRNA.	9606	HumanHT-12 v3.0 Expression BeadChip array (Illumina) was used.	Standard Illumina scanning protocol	SAMPLE 13	Genomestudio, quantile normalization	GPL6947	Yong-Min,,Huh	Yonsei University	50 Shinchon-ro	Seoul	120-749	South Korea	ftp://ftp.ncbi.nlm.nih.gov/geo/samples/GSM2235nnn/GSM2235707/suppl/GSM2235707_5050509048_A_Grn.idat.gz	48708
GSM2235708	Public on Mar 20 2018	Jul 14 2016	Mar 20 2018	RNA	1	Human gastric cancer	Homo sapiens	tissue: gastric cancer	age: 66	Sex: male	ptstage: T4	pnstage: N1	death: 0	duration overall survival: 109	total RNA	RecoverAll鈩?total nucleic acid isolation kit (Ambion) or the mirVana RNA Isolation Labeling Kit (Ambion) were used. Quality control was performed with NanoDrop 2000 (Thermo Fischer Scientific) and RNA Nano 6000 chip (Agilent).	biotin	Illumina TotalPrep鈩?RNA Amplification Kit was used for synthesis of labeled cRNA.	9606	HumanHT-12 v3.0 Expression BeadChip array (Illumina) was used.	Standard Illumina scanning protocol	SAMPLE 14	Genomestudio, quantile normalization	GPL6947	Yong-Min,,Huh	Yonsei University	50 Shinchon-ro	Seoul	120-749	South Korea	ftp://ftp.ncbi.nlm.nih.gov/geo/samples/GSM2235nnn/GSM2235708/suppl/GSM2235708_5050509048_B_Grn.idat.gz	48708
GSM2235709	Public on Mar 20 2018	Jul 14 2016	Mar 20 2018	RNA	1	Human gastric cancer	Homo sapiens	tissue: gastric cancer	age: 54	Sex: female	ptstage: T2	pnstage: N0	death: 0	duration overall survival: 108	total RNA	RecoverAll鈩?total nucleic acid isolation kit (Ambion) or the mirVana RNA Isolation Labeling Kit (Ambion) were used. Quality control was performed with NanoDrop 2000 (Thermo Fischer Scientific) and RNA Nano 6000 chip (Agilent).	biotin	Illumina TotalPrep鈩?RNA Amplification Kit was used for synthesis of labeled cRNA.	9606	HumanHT-12 v3.0 Expression BeadChip array (Illumina) was used.	Standard Illumina scanning protocol	SAMPLE 15	Genomestudio, quantile normalization	GPL6947	Yong-Min,,Huh	Yonsei University	50 Shinchon-ro	Seoul	120-749	South Korea	ftp://ftp.ncbi.nlm.nih.gov/geo/samples/GSM2235nnn/GSM2235709/suppl/GSM2235709_5050509048_C_Grn.idat.gz	48708
GSM2235710	Public on Mar 20 2018	Jul 14 2016	Mar 20 2018	RNA	1	Human gastric cancer	Homo sapiens	tissue: gastric cancer	age: 54	Sex: male	ptstage: T4	pnstage: N0	death: 1	duration overall survival: 13	total RNA	RecoverAll鈩?total nucleic acid isolation kit (Ambion) or the mirVana RNA Isolation Labeling Kit (Ambion) were used. Quality control was performed with NanoDrop 2000 (Thermo Fischer Scientific) and RNA Nano 6000 chip (Agilent).	biotin	Illumina TotalPrep鈩?RNA Amplification Kit was used for synthesis of labeled cRNA.	9606	HumanHT-12 v3.0 Expression BeadChip array (Illumina) was used.	Standard Illumina scanning protocol	SAMPLE 16	Genomestudio, quantile normalization	GPL6947	Yong-Min,,Huh	Yonsei University	50 Shinchon-ro	Seoul	120-749	South Korea	ftp://ftp.ncbi.nlm.nih.gov/geo/samples/GSM2235nnn/GSM2235710/suppl/GSM2235710_5050509048_D_Grn.idat.gz	48708
GSM2235711	Public on Mar 20 2018	Jul 14 2016	Mar 20 2018	RNA	1	Human gastric cancer	Homo sapiens	tissue: gastric cancer	age: 65	Sex: male	ptstage: T4	pnstage: N1	death: 1	duration overall survival: 19	total RNA	RecoverAll鈩?total nucleic acid isolation kit (Ambion) or the mirVana RNA Isolation Labeling Kit (Ambion) were used. Quality control was performed with NanoDrop 2000 (Thermo Fischer Scientific) and RNA Nano 6000 chip (Agilent).	biotin	Illumina TotalPrep鈩?RNA Amplification Kit was used for synthesis of labeled cRNA.	9606	HumanHT-12 v3.0 Expression BeadChip array (Illumina) was used.	Standard Illumina scanning protocol	SAMPLE 17	Genomestudio, quantile normalization	GPL6947	Yong-Min,,Huh	Yonsei University	50 Shinchon-ro	Seoul	120-749	South Korea	ftp://ftp.ncbi.nlm.nih.gov/geo/samples/GSM2235nnn/GSM2235711/suppl/GSM2235711_5050509048_F_Grn.idat.gz	48708
GSM2235712	Public on Mar 20 2018	Jul 14 2016	Mar 20 2018	RNA	1	Human gastric cancer	Homo sapiens	tissue: gastric cancer	age: 70	Sex: female	ptstage: T2	pnstage: N0	death: 0	duration overall survival: 108	total RNA	RecoverAll鈩?total nucleic acid isolation kit (Ambion) or the mirVana RNA Isolation Labeling Kit (Ambion) were used. Quality control was performed with NanoDrop 2000 (Thermo Fischer Scientific) and RNA Nano 6000 chip (Agilent).	biotin	Illumina TotalPrep鈩?RNA Amplification Kit was used for synthesis of labeled cRNA.	9606	HumanHT-12 v3.0 Expression BeadChip array (Illumina) was used.	Standard Illumina scanning protocol	SAMPLE 18	Genomestudio, quantile normalization	GPL6947	Yong-Min,,Huh	Yonsei University	50 Shinchon-ro	Seoul	120-749	South Korea	ftp://ftp.ncbi.nlm.nih.gov/geo/samples/GSM2235nnn/GSM2235712/suppl/GSM2235712_5050509048_G_Grn.idat.gz	48708
GSM2235713	Public on Mar 20 2018	Jul 14 2016	Mar 20 2018	RNA	1	Human gastric cancer	Homo sapiens	tissue: gastric cancer	age: 59	Sex: male	ptstage: T4	pnstage: N0	death: 1	duration overall survival: 116	total RNA	RecoverAll鈩?total nucleic acid isolation kit (Ambion) or the mirVana RNA Isolation Labeling Kit (Ambion) were used. Quality control was performed with NanoDrop 2000 (Thermo Fischer Scientific) and RNA Nano 6000 chip (Agilent).	biotin	Illumina TotalPrep鈩?RNA Amplification Kit was used for synthesis of labeled cRNA.	9606	HumanHT-12 v3.0 Expression BeadChip array (Illumina) was used.	Standard Illumina scanning protocol	SAMPLE 19	Genomestudio, quantile normalization	GPL6947	Yong-Min,,Huh	Yonsei University	50 Shinchon-ro	Seoul	120-749	South Korea	ftp://ftp.ncbi.nlm.nih.gov/geo/samples/GSM2235nnn/GSM2235713/suppl/GSM2235713_5050509048_H_Grn.idat.gz	48708
GSM2235714	Public on Mar 20 2018	Jul 14 2016	Mar 20 2018	RNA	1	Human gastric cancer	Homo sapiens	tissue: gastric cancer	age: 61	Sex: male	ptstage: T2	pnstage: N1	death: 1	duration overall survival: 46	total RNA	RecoverAll鈩?total nucleic acid isolation kit (Ambion) or the mirVana RNA Isolation Labeling Kit (Ambion) were used. Quality control was performed with NanoDrop 2000 (Thermo Fischer Scientific) and RNA Nano 6000 chip (Agilent).	biotin	Illumina TotalPrep鈩?RNA Amplification Kit was used for synthesis of labeled cRNA.	9606	HumanHT-12 v3.0 Expression BeadChip array (Illumina) was used.	Standard Illumina scanning protocol	SAMPLE 20	Genomestudio, quantile normalization	GPL6947	Yong-Min,,Huh	Yonsei University	50 Shinchon-ro	Seoul	120-749	South Korea	ftp://ftp.ncbi.nlm.nih.gov/geo/samples/GSM2235nnn/GSM2235714/suppl/GSM2235714_5050509048_I_Grn.idat.gz	48708
GSM2235715	Public on Mar 20 2018	Jul 14 2016	Mar 20 2018	RNA	1	Human gastric cancer	Homo sapiens	tissue: gastric cancer	age: 58	Sex: male	ptstage: T4	pnstage: N1	death: 0	duration overall survival: 118	total RNA	RecoverAll鈩?total nucleic acid isolation kit (Ambion) or the mirVana RNA Isolation Labeling Kit (Ambion) were used. Quality control was performed with NanoDrop 2000 (Thermo Fischer Scientific) and RNA Nano 6000 chip (Agilent).	biotin	Illumina TotalPrep鈩?RNA Amplification Kit was used for synthesis of labeled cRNA.	9606	HumanHT-12 v3.0 Expression BeadChip array (Illumina) was used.	Standard Illumina scanning protocol	SAMPLE 21	Genomestudio, quantile normalization	GPL6947	Yong-Min,,Huh	Yonsei University	50 Shinchon-ro	Seoul	120-749	South Korea	ftp://ftp.ncbi.nlm.nih.gov/geo/samples/GSM2235nnn/GSM2235715/suppl/GSM2235715_5050509048_J_Grn.idat.gz	48708
GSM2235716	Public on Mar 20 2018	Jul 14 2016	Mar 20 2018	RNA	1	Human gastric cancer	Homo sapiens	tissue: gastric cancer	age: 46	Sex: male	ptstage: T3	pnstage: N1	death: 1	duration overall survival: 104	total RNA	RecoverAll鈩?total nucleic acid isolation kit (Ambion) or the mirVana RNA Isolation Labeling Kit (Ambion) were used. Quality control was performed with NanoDrop 2000 (Thermo Fischer Scientific) and RNA Nano 6000 chip (Agilent).	biotin	Illumina TotalPrep鈩?RNA Amplification Kit was used for synthesis of labeled cRNA.	9606	HumanHT-12 v3.0 Expression BeadChip array (Illumina) was used.	Standard Illumina scanning protocol	SAMPLE 22	Genomestudio, quantile normalization	GPL6947	Yong-Min,,Huh	Yonsei University	50 Shinchon-ro	Seoul	120-749	South Korea	ftp://ftp.ncbi.nlm.nih.gov/geo/samples/GSM2235nnn/GSM2235716/suppl/GSM2235716_5050509048_L_Grn.idat.gz	48708
GSM2235717	Public on Mar 20 2018	Jul 14 2016	Mar 20 2018	RNA	1	Human gastric cancer	Homo sapiens	tissue: gastric cancer	age: 43	Sex: female	ptstage: T4	pnstage: N3	death: 1	duration overall survival: 3	total RNA	RecoverAll鈩?total nucleic acid isolation kit (Ambion) or the mirVana RNA Isolation Labeling Kit (Ambion) were used. Quality control was performed with NanoDrop 2000 (Thermo Fischer Scientific) and RNA Nano 6000 chip (Agilent).	biotin	Illumina TotalPrep鈩?RNA Amplification Kit was used for synthesis of labeled cRNA.	9606	HumanHT-12 v3.0 Expression BeadChip array (Illumina) was used.	Standard Illumina scanning protocol	SAMPLE 23	Genomestudio, quantile normalization	GPL6947	Yong-Min,,Huh	Yonsei University	50 Shinchon-ro	Seoul	120-749	South Korea	ftp://ftp.ncbi.nlm.nih.gov/geo/samples/GSM2235nnn/GSM2235717/suppl/GSM2235717_5050509074_H_Grn.idat.gz	48708
GSM2235718	Public on Mar 20 2018	Jul 14 2016	Mar 20 2018	RNA	1	Human gastric cancer	Homo sapiens	tissue: gastric cancer	age: 46	Sex: male	ptstage: T4	pnstage: N1	death: 0	duration overall survival: 119	total RNA	RecoverAll鈩?total nucleic acid isolation kit (Ambion) or the mirVana RNA Isolation Labeling Kit (Ambion) were used. Quality control was performed with NanoDrop 2000 (Thermo Fischer Scientific) and RNA Nano 6000 chip (Agilent).	biotin	Illumina TotalPrep鈩?RNA Amplification Kit was used for synthesis of labeled cRNA.	9606	HumanHT-12 v3.0 Expression BeadChip array (Illumina) was used.	Standard Illumina scanning protocol	SAMPLE 24	Genomestudio, quantile normalization	GPL6947	Yong-Min,,Huh	Yonsei University	50 Shinchon-ro	Seoul	120-749	South Korea	ftp://ftp.ncbi.nlm.nih.gov/geo/samples/GSM2235nnn/GSM2235718/suppl/GSM2235718_5050509074_I_Grn.idat.gz	48708
GSM2235719	Public on Mar 20 2018	Jul 14 2016	Mar 20 2018	RNA	1	Human gastric cancer	Homo sapiens	tissue: gastric cancer	age: 68	Sex: male	ptstage: T4	pnstage: N2	death: 1	duration overall survival: 1	total RNA	RecoverAll鈩?total nucleic acid isolation kit (Ambion) or the mirVana RNA Isolation Labeling Kit (Ambion) were used. Quality control was performed with NanoDrop 2000 (Thermo Fischer Scientific) and RNA Nano 6000 chip (Agilent).	biotin	Illumina TotalPrep鈩?RNA Amplification Kit was used for synthesis of labeled cRNA.	9606	HumanHT-12 v3.0 Expression BeadChip array (Illumina) was used.	Standard Illumina scanning protocol	SAMPLE 25	Genomestudio, quantile normalization	GPL6947	Yong-Min,,Huh	Yonsei University	50 Shinchon-ro	Seoul	120-749	South Korea	ftp://ftp.ncbi.nlm.nih.gov/geo/samples/GSM2235nnn/GSM2235719/suppl/GSM2235719_5050509074_J_Grn.idat.gz	48708
GSM2235720	Public on Mar 20 2018	Jul 14 2016	Mar 20 2018	RNA	1	Human gastric cancer	Homo sapiens	tissue: gastric cancer	age: 56	Sex: male	ptstage: T1	pnstage: N0	death: 0	duration overall survival: 119	total RNA	RecoverAll鈩?total nucleic acid isolation kit (Ambion) or the mirVana RNA Isolation Labeling Kit (Ambion) were used. Quality control was performed with NanoDrop 2000 (Thermo Fischer Scientific) and RNA Nano 6000 chip (Agilent).	biotin	Illumina TotalPrep鈩?RNA Amplification Kit was used for synthesis of labeled cRNA.	9606	HumanHT-12 v3.0 Expression BeadChip array (Illumina) was used.	Standard Illumina scanning protocol	SAMPLE 26	Genomestudio, quantile normalization	GPL6947	Yong-Min,,Huh	Yonsei University	50 Shinchon-ro	Seoul	120-749	South Korea	ftp://ftp.ncbi.nlm.nih.gov/geo/samples/GSM2235nnn/GSM2235720/suppl/GSM2235720_5050509074_K_Grn.idat.gz	48708
GSM2235721	Public on Mar 20 2018	Jul 14 2016	Mar 20 2018	RNA	1	Human gastric cancer	Homo sapiens	tissue: gastric cancer	age: 41	Sex: male	ptstage: T2	pnstage: N1	death: 0	duration overall survival: 119	total RNA	RecoverAll鈩?total nucleic acid isolation kit (Ambion) or the mirVana RNA Isolation Labeling Kit (Ambion) were used. Quality control was performed with NanoDrop 2000 (Thermo Fischer Scientific) and RNA Nano 6000 chip (Agilent).	biotin	Illumina TotalPrep鈩?RNA Amplification Kit was used for synthesis of labeled cRNA.	9606	HumanHT-12 v3.0 Expression BeadChip array (Illumina) was used.	Standard Illumina scanning protocol	SAMPLE 27	Genomestudio, quantile normalization	GPL6947	Yong-Min,,Huh	Yonsei University	50 Shinchon-ro	Seoul	120-749	South Korea	ftp://ftp.ncbi.nlm.nih.gov/geo/samples/GSM2235nnn/GSM2235721/suppl/GSM2235721_5050509074_L_Grn.idat.gz	48708
GSM2235722	Public on Mar 20 2018	Jul 14 2016	Mar 20 2018	RNA	1	Human gastric cancer	Homo sapiens	tissue: gastric cancer	age: 63	Sex: female	ptstage: T4	pnstage: N2	death: 1	duration overall survival: 36	total RNA	RecoverAll鈩?total nucleic acid isolation kit (Ambion) or the mirVana RNA Isolation Labeling Kit (Ambion) were used. Quality control was performed with NanoDrop 2000 (Thermo Fischer Scientific) and RNA Nano 6000 chip (Agilent).	biotin	Illumina TotalPrep鈩?RNA Amplification Kit was used for synthesis of labeled cRNA.	9606	HumanHT-12 v3.0 Expression BeadChip array (Illumina) was used.	Standard Illumina scanning protocol	SAMPLE 28	Genomestudio, quantile normalization	GPL6947	Yong-Min,,Huh	Yonsei University	50 Shinchon-ro	Seoul	120-749	South Korea	ftp://ftp.ncbi.nlm.nih.gov/geo/samples/GSM2235nnn/GSM2235722/suppl/GSM2235722_5050509079_A_Grn.idat.gz	48708
GSM2235723	Public on Mar 20 2018	Jul 14 2016	Mar 20 2018	RNA	1	Human gastric cancer	Homo sapiens	tissue: gastric cancer	age: 52	Sex: male	ptstage: T3	pnstage: N2	death: 0	duration overall survival: 118	total RNA	RecoverAll鈩?total nucleic acid isolation kit (Ambion) or the mirVana RNA Isolation Labeling Kit (Ambion) were used. Quality control was performed with NanoDrop 2000 (Thermo Fischer Scientific) and RNA Nano 6000 chip (Agilent).	biotin	Illumina TotalPrep鈩?RNA Amplification Kit was used for synthesis of labeled cRNA.	9606	HumanHT-12 v3.0 Expression BeadChip array (Illumina) was used.	Standard Illumina scanning protocol	SAMPLE 29	Genomestudio, quantile normalization	GPL6947	Yong-Min,,Huh	Yonsei University	50 Shinchon-ro	Seoul	120-749	South Korea	ftp://ftp.ncbi.nlm.nih.gov/geo/samples/GSM2235nnn/GSM2235723/suppl/GSM2235723_5050509079_B_Grn.idat.gz	48708
GSM2235724	Public on Mar 20 2018	Jul 14 2016	Mar 20 2018	RNA	1	Human gastric cancer	Homo sapiens	tissue: gastric cancer	age: 74	Sex: male	ptstage: T3	pnstage: N3	death: 1	duration overall survival: 10	total RNA	RecoverAll鈩?total nucleic acid isolation kit (Ambion) or the mirVana RNA Isolation Labeling Kit (Ambion) were used. Quality control was performed with NanoDrop 2000 (Thermo Fischer Scientific) and RNA Nano 6000 chip (Agilent).	biotin	Illumina TotalPrep鈩?RNA Amplification Kit was used for synthesis of labeled cRNA.	9606	HumanHT-12 v3.0 Expression BeadChip array (Illumina) was used.	Standard Illumina scanning protocol	SAMPLE 30	Genomestudio, quantile normalization	GPL6947	Yong-Min,,Huh	Yonsei University	50 Shinchon-ro	Seoul	120-749	South Korea	ftp://ftp.ncbi.nlm.nih.gov/geo/samples/GSM2235nnn/GSM2235724/suppl/GSM2235724_5050509079_C_Grn.idat.gz	48708
GSM2235725	Public on Mar 20 2018	Jul 14 2016	Mar 20 2018	RNA	1	Human gastric cancer	Homo sapiens	tissue: gastric cancer	age: 65	Sex: female	ptstage: T4	pnstage: N0	death: 0	duration overall survival: 122	total RNA	RecoverAll鈩?total nucleic acid isolation kit (Ambion) or the mirVana RNA Isolation Labeling Kit (Ambion) were used. Quality control was performed with NanoDrop 2000 (Thermo Fischer Scientific) and RNA Nano 6000 chip (Agilent).	biotin	Illumina TotalPrep鈩?RNA Amplification Kit was used for synthesis of labeled cRNA.	9606	HumanHT-12 v3.0 Expression BeadChip array (Illumina) was used.	Standard Illumina scanning protocol	SAMPLE 31	Genomestudio, quantile normalization	GPL6947	Yong-Min,,Huh	Yonsei University	50 Shinchon-ro	Seoul	120-749	South Korea	ftp://ftp.ncbi.nlm.nih.gov/geo/samples/GSM2235nnn/GSM2235725/suppl/GSM2235725_5050509079_D_Grn.idat.gz	48708
GSM2235726	Public on Mar 20 2018	Jul 14 2016	Mar 20 2018	RNA	1	Human gastric cancer	Homo sapiens	tissue: gastric cancer	age: 68	Sex: male	ptstage: T4	pnstage: N2	death: 1	duration overall survival: 1	total RNA	RecoverAll鈩?total nucleic acid isolation kit (Ambion) or the mirVana RNA Isolation Labeling Kit (Ambion) were used. Quality control was performed with NanoDrop 2000 (Thermo Fischer Scientific) and RNA Nano 6000 chip (Agilent).	biotin	Illumina TotalPrep鈩?RNA Amplification Kit was used for synthesis of labeled cRNA.	9606	HumanHT-12 v3.0 Expression BeadChip array (Illumina) was used.	Standard Illumina scanning protocol	SAMPLE 32	Genomestudio, quantile normalization	GPL6947	Yong-Min,,Huh	Yonsei University	50 Shinchon-ro	Seoul	120-749	South Korea	ftp://ftp.ncbi.nlm.nih.gov/geo/samples/GSM2235nnn/GSM2235726/suppl/GSM2235726_5050509079_E_Grn.idat.gz	48708
GSM2235727	Public on Mar 20 2018	Jul 14 2016	Mar 20 2018	RNA	1	Human gastric cancer	Homo sapiens	tissue: gastric cancer	age: 71	Sex: male	ptstage: T4	pnstage: N3	death: 0	duration overall survival: 118	total RNA	RecoverAll鈩?total nucleic acid isolation kit (Ambion) or the mirVana RNA Isolation Labeling Kit (Ambion) were used. Quality control was performed with NanoDrop 2000 (Thermo Fischer Scientific) and RNA Nano 6000 chip (Agilent).	biotin	Illumina TotalPrep鈩?RNA Amplification Kit was used for synthesis of labeled cRNA.	9606	HumanHT-12 v3.0 Expression BeadChip array (Illumina) was used.	Standard Illumina scanning protocol	SAMPLE 33	Genomestudio, quantile normalization	GPL6947	Yong-Min,,Huh	Yonsei University	50 Shinchon-ro	Seoul	120-749	South Korea	ftp://ftp.ncbi.nlm.nih.gov/geo/samples/GSM2235nnn/GSM2235727/suppl/GSM2235727_5050509079_F_Grn.idat.gz	48708
GSM2235728	Public on Mar 20 2018	Jul 14 2016	Mar 20 2018	RNA	1	Human gastric cancer	Homo sapiens	tissue: gastric cancer	age: 40	Sex: female	ptstage: T4	pnstage: N1	death: 1	duration overall survival: 35	total RNA	RecoverAll鈩?total nucleic acid isolation kit (Ambion) or the mirVana RNA Isolation Labeling Kit (Ambion) were used. Quality control was performed with NanoDrop 2000 (Thermo Fischer Scientific) and RNA Nano 6000 chip (Agilent).	biotin	Illumina TotalPrep鈩?RNA Amplification Kit was used for synthesis of labeled cRNA.	9606	HumanHT-12 v3.0 Expression BeadChip array (Illumina) was used.	Standard Illumina scanning protocol	SAMPLE 34	Genomestudio, quantile normalization	GPL6947	Yong-Min,,Huh	Yonsei University	50 Shinchon-ro	Seoul	120-749	South Korea	ftp://ftp.ncbi.nlm.nih.gov/geo/samples/GSM2235nnn/GSM2235728/suppl/GSM2235728_5050509079_G_Grn.idat.gz	48708
GSM2235729	Public on Mar 20 2018	Jul 14 2016	Mar 20 2018	RNA	1	Human gastric cancer	Homo sapiens	tissue: gastric cancer	age: 67	Sex: male	ptstage: T4	pnstage: N2	death: 1	duration overall survival: 5	total RNA	RecoverAll鈩?total nucleic acid isolation kit (Ambion) or the mirVana RNA Isolation Labeling Kit (Ambion) were used. Quality control was performed with NanoDrop 2000 (Thermo Fischer Scientific) and RNA Nano 6000 chip (Agilent).	biotin	Illumina TotalPrep鈩?RNA Amplification Kit was used for synthesis of labeled cRNA.	9606	HumanHT-12 v3.0 Expression BeadChip array (Illumina) was used.	Standard Illumina scanning protocol	SAMPLE 35	Genomestudio, quantile normalization	GPL6947	Yong-Min,,Huh	Yonsei University	50 Shinchon-ro	Seoul	120-749	South Korea	ftp://ftp.ncbi.nlm.nih.gov/geo/samples/GSM2235nnn/GSM2235729/suppl/GSM2235729_5050509079_H_Grn.idat.gz	48708
GSM2235730	Public on Mar 20 2018	Jul 14 2016	Mar 20 2018	RNA	1	Human gastric cancer	Homo sapiens	tissue: gastric cancer	age: 68	Sex: female	ptstage: T1	pnstage: N1	death: 1	duration overall survival: 49	total RNA	RecoverAll鈩?total nucleic acid isolation kit (Ambion) or the mirVana RNA Isolation Labeling Kit (Ambion) were used. Quality control was performed with NanoDrop 2000 (Thermo Fischer Scientific) and RNA Nano 6000 chip (Agilent).	biotin	Illumina TotalPrep鈩?RNA Amplification Kit was used for synthesis of labeled cRNA.	9606	HumanHT-12 v3.0 Expression BeadChip array (Illumina) was used.	Standard Illumina scanning protocol	SAMPLE 36	Genomestudio, quantile normalization	GPL6947	Yong-Min,,Huh	Yonsei University	50 Shinchon-ro	Seoul	120-749	South Korea	ftp://ftp.ncbi.nlm.nih.gov/geo/samples/GSM2235nnn/GSM2235730/suppl/GSM2235730_5050509079_I_Grn.idat.gz	48708
GSM2235731	Public on Mar 20 2018	Jul 14 2016	Mar 20 2018	RNA	1	Human gastric cancer	Homo sapiens	tissue: gastric cancer	age: 63	Sex: female	ptstage: T2	pnstage: N1	death: 0	duration overall survival: 118	total RNA	RecoverAll鈩?total nucleic acid isolation kit (Ambion) or the mirVana RNA Isolation Labeling Kit (Ambion) were used. Quality control was performed with NanoDrop 2000 (Thermo Fischer Scientific) and RNA Nano 6000 chip (Agilent).	biotin	Illumina TotalPrep鈩?RNA Amplification Kit was used for synthesis of labeled cRNA.	9606	HumanHT-12 v3.0 Expression BeadChip array (Illumina) was used.	Standard Illumina scanning protocol	SAMPLE 37	Genomestudio, quantile normalization	GPL6947	Yong-Min,,Huh	Yonsei University	50 Shinchon-ro	Seoul	120-749	South Korea	ftp://ftp.ncbi.nlm.nih.gov/geo/samples/GSM2235nnn/GSM2235731/suppl/GSM2235731_5050509079_J_Grn.idat.gz	48708
GSM2235732	Public on Mar 20 2018	Jul 14 2016	Mar 20 2018	RNA	1	Human gastric cancer	Homo sapiens	tissue: gastric cancer	age: 74	Sex: male	ptstage: T2	pnstage: N1	death: 0	duration overall survival: 118	total RNA	RecoverAll鈩?total nucleic acid isolation kit (Ambion) or the mirVana RNA Isolation Labeling Kit (Ambion) were used. Quality control was performed with NanoDrop 2000 (Thermo Fischer Scientific) and RNA Nano 6000 chip (Agilent).	biotin	Illumina TotalPrep鈩?RNA Amplification Kit was used for synthesis of labeled cRNA.	9606	HumanHT-12 v3.0 Expression BeadChip array (Illumina) was used.	Standard Illumina scanning protocol	SAMPLE 38	Genomestudio, quantile normalization	GPL6947	Yong-Min,,Huh	Yonsei University	50 Shinchon-ro	Seoul	120-749	South Korea	ftp://ftp.ncbi.nlm.nih.gov/geo/samples/GSM2235nnn/GSM2235732/suppl/GSM2235732_5050509079_L_Grn.idat.gz	48708
GSM2235733	Public on Mar 20 2018	Jul 14 2016	Mar 20 2018	RNA	1	Human gastric cancer	Homo sapiens	tissue: gastric cancer	age: 72	Sex: male	ptstage: T3	pnstage: N1	death: 0	duration overall survival: 144	total RNA	RecoverAll鈩?total nucleic acid isolation kit (Ambion) or the mirVana RNA Isolation Labeling Kit (Ambion) were used. Quality control was performed with NanoDrop 2000 (Thermo Fischer Scientific) and RNA Nano 6000 chip (Agilent).	biotin	Illumina TotalPrep鈩?RNA Amplification Kit was used for synthesis of labeled cRNA.	9606	HumanHT-12 v3.0 Expression BeadChip array (Illumina) was used.	Standard Illumina scanning protocol	SAMPLE 39	Genomestudio, quantile normalization	GPL6947	Yong-Min,,Huh	Yonsei University	50 Shinchon-ro	Seoul	120-749	South Korea	ftp://ftp.ncbi.nlm.nih.gov/geo/samples/GSM2235nnn/GSM2235733/suppl/GSM2235733_5083896130_A_Grn.idat.gz	48708
GSM2235734	Public on Mar 20 2018	Jul 14 2016	Mar 20 2018	RNA	1	Human gastric cancer	Homo sapiens	tissue: gastric cancer	age: 45	Sex: female	ptstage: T4	pnstage: N1	death: 0	duration overall survival: 144	total RNA	RecoverAll鈩?total nucleic acid isolation kit (Ambion) or the mirVana RNA Isolation Labeling Kit (Ambion) were used. Quality control was performed with NanoDrop 2000 (Thermo Fischer Scientific) and RNA Nano 6000 chip (Agilent).	biotin	Illumina TotalPrep鈩?RNA Amplification Kit was used for synthesis of labeled cRNA.	9606	HumanHT-12 v3.0 Expression BeadChip array (Illumina) was used.	Standard Illumina scanning protocol	SAMPLE 40	Genomestudio, quantile normalization	GPL6947	Yong-Min,,Huh	Yonsei University	50 Shinchon-ro	Seoul	120-749	South Korea	ftp://ftp.ncbi.nlm.nih.gov/geo/samples/GSM2235nnn/GSM2235734/suppl/GSM2235734_5083896130_B_Grn.idat.gz	48708
GSM2235735	Public on Mar 20 2018	Jul 14 2016	Mar 20 2018	RNA	1	Human gastric cancer	Homo sapiens	tissue: gastric cancer	age: 53	Sex: male	ptstage: T3	pnstage: N2	death: 0	duration overall survival: 145	total RNA	RecoverAll鈩?total nucleic acid isolation kit (Ambion) or the mirVana RNA Isolation Labeling Kit (Ambion) were used. Quality control was performed with NanoDrop 2000 (Thermo Fischer Scientific) and RNA Nano 6000 chip (Agilent).	biotin	Illumina TotalPrep鈩?RNA Amplification Kit was used for synthesis of labeled cRNA.	9606	HumanHT-12 v3.0 Expression BeadChip array (Illumina) was used.	Standard Illumina scanning protocol	SAMPLE 41	Genomestudio, quantile normalization	GPL6947	Yong-Min,,Huh	Yonsei University	50 Shinchon-ro	Seoul	120-749	South Korea	ftp://ftp.ncbi.nlm.nih.gov/geo/samples/GSM2235nnn/GSM2235735/suppl/GSM2235735_5083896130_C_Grn.idat.gz	48708
GSM2235736	Public on Mar 20 2018	Jul 14 2016	Mar 20 2018	RNA	1	Human gastric cancer	Homo sapiens	tissue: gastric cancer	age: 61	Sex: male	ptstage: T4	pnstage: N2	death: 1	duration overall survival: 9	total RNA	RecoverAll鈩?total nucleic acid isolation kit (Ambion) or the mirVana RNA Isolation Labeling Kit (Ambion) were used. Quality control was performed with NanoDrop 2000 (Thermo Fischer Scientific) and RNA Nano 6000 chip (Agilent).	biotin	Illumina TotalPrep鈩?RNA Amplification Kit was used for synthesis of labeled cRNA.	9606	HumanHT-12 v3.0 Expression BeadChip array (Illumina) was used.	Standard Illumina scanning protocol	SAMPLE 42	Genomestudio, quantile normalization	GPL6947	Yong-Min,,Huh	Yonsei University	50 Shinchon-ro	Seoul	120-749	South Korea	ftp://ftp.ncbi.nlm.nih.gov/geo/samples/GSM2235nnn/GSM2235736/suppl/GSM2235736_5083896130_D_Grn.idat.gz	48708
GSM2235737	Public on Mar 20 2018	Jul 14 2016	Mar 20 2018	RNA	1	Human gastric cancer	Homo sapiens	tissue: gastric cancer	age: 51	Sex: male	ptstage: T4	pnstage: N2	death: 1	duration overall survival: 45	total RNA	RecoverAll鈩?total nucleic acid isolation kit (Ambion) or the mirVana RNA Isolation Labeling Kit (Ambion) were used. Quality control was performed with NanoDrop 2000 (Thermo Fischer Scientific) and RNA Nano 6000 chip (Agilent).	biotin	Illumina TotalPrep鈩?RNA Amplification Kit was used for synthesis of labeled cRNA.	9606	HumanHT-12 v3.0 Expression BeadChip array (Illumina) was used.	Standard Illumina scanning protocol	SAMPLE 43	Genomestudio, quantile normalization	GPL6947	Yong-Min,,Huh	Yonsei University	50 Shinchon-ro	Seoul	120-749	South Korea	ftp://ftp.ncbi.nlm.nih.gov/geo/samples/GSM2235nnn/GSM2235737/suppl/GSM2235737_5083896130_E_Grn.idat.gz	48708
GSM2235738	Public on Mar 20 2018	Jul 14 2016	Mar 20 2018	RNA	1	Human gastric cancer	Homo sapiens	tissue: gastric cancer	age: 59	Sex: female	ptstage: T4	pnstage: N2	death: 0	duration overall survival: 153	total RNA	RecoverAll鈩?total nucleic acid isolation kit (Ambion) or the mirVana RNA Isolation Labeling Kit (Ambion) were used. Quality control was performed with NanoDrop 2000 (Thermo Fischer Scientific) and RNA Nano 6000 chip (Agilent).	biotin	Illumina TotalPrep鈩?RNA Amplification Kit was used for synthesis of labeled cRNA.	9606	HumanHT-12 v3.0 Expression BeadChip array (Illumina) was used.	Standard Illumina scanning protocol	SAMPLE 44	Genomestudio, quantile normalization	GPL6947	Yong-Min,,Huh	Yonsei University	50 Shinchon-ro	Seoul	120-749	South Korea	ftp://ftp.ncbi.nlm.nih.gov/geo/samples/GSM2235nnn/GSM2235738/suppl/GSM2235738_5083896130_F_Grn.idat.gz	48708
GSM2235739	Public on Mar 20 2018	Jul 14 2016	Mar 20 2018	RNA	1	Human gastric cancer	Homo sapiens	tissue: gastric cancer	age: 66	Sex: male	ptstage: T3	pnstage: N2	death: 1	duration overall survival: 14	total RNA	RecoverAll鈩?total nucleic acid isolation kit (Ambion) or the mirVana RNA Isolation Labeling Kit (Ambion) were used. Quality control was performed with NanoDrop 2000 (Thermo Fischer Scientific) and RNA Nano 6000 chip (Agilent).	biotin	Illumina TotalPrep鈩?RNA Amplification Kit was used for synthesis of labeled cRNA.	9606	HumanHT-12 v3.0 Expression BeadChip array (Illumina) was used.	Standard Illumina scanning protocol	SAMPLE 45	Genomestudio, quantile normalization	GPL6947	Yong-Min,,Huh	Yonsei University	50 Shinchon-ro	Seoul	120-749	South Korea	ftp://ftp.ncbi.nlm.nih.gov/geo/samples/GSM2235nnn/GSM2235739/suppl/GSM2235739_5083896130_G_Grn.idat.gz	48708
GSM2235740	Public on Mar 20 2018	Jul 14 2016	Mar 20 2018	RNA	1	Human gastric cancer	Homo sapiens	tissue: gastric cancer	age: 69	Sex: male	ptstage: T3	pnstage: N1	death: 1	duration overall survival: 4	total RNA	RecoverAll鈩?total nucleic acid isolation kit (Ambion) or the mirVana RNA Isolation Labeling Kit (Ambion) were used. Quality control was performed with NanoDrop 2000 (Thermo Fischer Scientific) and RNA Nano 6000 chip (Agilent).	biotin	Illumina TotalPrep鈩?RNA Amplification Kit was used for synthesis of labeled cRNA.	9606	HumanHT-12 v3.0 Expression BeadChip array (Illumina) was used.	Standard Illumina scanning protocol	SAMPLE 46	Genomestudio, quantile normalization	GPL6947	Yong-Min,,Huh	Yonsei University	50 Shinchon-ro	Seoul	120-749	South Korea	ftp://ftp.ncbi.nlm.nih.gov/geo/samples/GSM2235nnn/GSM2235740/suppl/GSM2235740_5083896130_H_Grn.idat.gz	48708
GSM2235741	Public on Mar 20 2018	Jul 14 2016	Mar 20 2018	RNA	1	Human gastric cancer	Homo sapiens	tissue: gastric cancer	age: 49	Sex: male	ptstage: T4	pnstage: N2	death: 0	duration overall survival: 127	total RNA	RecoverAll鈩?total nucleic acid isolation kit (Ambion) or the mirVana RNA Isolation Labeling Kit (Ambion) were used. Quality control was performed with NanoDrop 2000 (Thermo Fischer Scientific) and RNA Nano 6000 chip (Agilent).	biotin	Illumina TotalPrep鈩?RNA Amplification Kit was used for synthesis of labeled cRNA.	9606	HumanHT-12 v3.0 Expression BeadChip array (Illumina) was used.	Standard Illumina scanning protocol	SAMPLE 47	Genomestudio, quantile normalization	GPL6947	Yong-Min,,Huh	Yonsei University	50 Shinchon-ro	Seoul	120-749	South Korea	ftp://ftp.ncbi.nlm.nih.gov/geo/samples/GSM2235nnn/GSM2235741/suppl/GSM2235741_5083896130_I_Grn.idat.gz	48708
GSM2235742	Public on Mar 20 2018	Jul 14 2016	Mar 20 2018	RNA	1	Human gastric cancer	Homo sapiens	tissue: gastric cancer	age: 62	Sex: male	ptstage: T4	pnstage: N2	death: 1	duration overall survival: 3	total RNA	RecoverAll鈩?total nucleic acid isolation kit (Ambion) or the mirVana RNA Isolation Labeling Kit (Ambion) were used. Quality control was performed with NanoDrop 2000 (Thermo Fischer Scientific) and RNA Nano 6000 chip (Agilent).	biotin	Illumina TotalPrep鈩?RNA Amplification Kit was used for synthesis of labeled cRNA.	9606	HumanHT-12 v3.0 Expression BeadChip array (Illumina) was used.	Standard Illumina scanning protocol	SAMPLE 48	Genomestudio, quantile normalization	GPL6947	Yong-Min,,Huh	Yonsei University	50 Shinchon-ro	Seoul	120-749	South Korea	ftp://ftp.ncbi.nlm.nih.gov/geo/samples/GSM2235nnn/GSM2235742/suppl/GSM2235742_5083896130_J_Grn.idat.gz	48708
GSM2235743	Public on Mar 20 2018	Jul 14 2016	Mar 20 2018	RNA	1	Human gastric cancer	Homo sapiens	tissue: gastric cancer	age: 64	Sex: female	ptstage: T4	pnstage: N1	death: 1	duration overall survival: 4	total RNA	RecoverAll鈩?total nucleic acid isolation kit (Ambion) or the mirVana RNA Isolation Labeling Kit (Ambion) were used. Quality control was performed with NanoDrop 2000 (Thermo Fischer Scientific) and RNA Nano 6000 chip (Agilent).	biotin	Illumina TotalPrep鈩?RNA Amplification Kit was used for synthesis of labeled cRNA.	9606	HumanHT-12 v3.0 Expression BeadChip array (Illumina) was used.	Standard Illumina scanning protocol	SAMPLE 49	Genomestudio, quantile normalization	GPL6947	Yong-Min,,Huh	Yonsei University	50 Shinchon-ro	Seoul	120-749	South Korea	ftp://ftp.ncbi.nlm.nih.gov/geo/samples/GSM2235nnn/GSM2235743/suppl/GSM2235743_5083896130_K_Grn.idat.gz	48708
GSM2235744	Public on Mar 20 2018	Jul 14 2016	Mar 20 2018	RNA	1	Human gastric cancer	Homo sapiens	tissue: gastric cancer	age: 38	Sex: female	ptstage: T4	pnstage: N1	death: 1	duration overall survival: 49	total RNA	RecoverAll鈩?total nucleic acid isolation kit (Ambion) or the mirVana RNA Isolation Labeling Kit (Ambion) were used. Quality control was performed with NanoDrop 2000 (Thermo Fischer Scientific) and RNA Nano 6000 chip (Agilent).	biotin	Illumina TotalPrep鈩?RNA Amplification Kit was used for synthesis of labeled cRNA.	9606	HumanHT-12 v3.0 Expression BeadChip array (Illumina) was used.	Standard Illumina scanning protocol	SAMPLE 50	Genomestudio, quantile normalization	GPL6947	Yong-Min,,Huh	Yonsei University	50 Shinchon-ro	Seoul	120-749	South Korea	ftp://ftp.ncbi.nlm.nih.gov/geo/samples/GSM2235nnn/GSM2235744/suppl/GSM2235744_5083896130_L_Grn.idat.gz	48708
GSM2235745	Public on Mar 20 2018	Jul 14 2016	Mar 20 2018	RNA	1	Human gastric cancer	Homo sapiens	tissue: gastric cancer	age: 53	Sex: male	ptstage: T4	pnstage: N2	death: 0	duration overall survival: 106	total RNA	RecoverAll鈩?total nucleic acid isolation kit (Ambion) or the mirVana RNA Isolation Labeling Kit (Ambion) were used. Quality control was performed with NanoDrop 2000 (Thermo Fischer Scientific) and RNA Nano 6000 chip (Agilent).	biotin	Illumina TotalPrep鈩?RNA Amplification Kit was used for synthesis of labeled cRNA.	9606	HumanHT-12 v3.0 Expression BeadChip array (Illumina) was used.	Standard Illumina scanning protocol	SAMPLE 51	Genomestudio, quantile normalization	GPL6947	Yong-Min,,Huh	Yonsei University	50 Shinchon-ro	Seoul	120-749	South Korea	ftp://ftp.ncbi.nlm.nih.gov/geo/samples/GSM2235nnn/GSM2235745/suppl/GSM2235745_5125398050_B_Grn.idat.gz	48708
GSM2235746	Public on Mar 20 2018	Jul 14 2016	Mar 20 2018	RNA	1	Human gastric cancer	Homo sapiens	tissue: gastric cancer	age: 53	Sex: male	ptstage: T3	pnstage: N1	death: 0	duration overall survival: 111	total RNA	RecoverAll鈩?total nucleic acid isolation kit (Ambion) or the mirVana RNA Isolation Labeling Kit (Ambion) were used. Quality control was performed with NanoDrop 2000 (Thermo Fischer Scientific) and RNA Nano 6000 chip (Agilent).	biotin	Illumina TotalPrep鈩?RNA Amplification Kit was used for synthesis of labeled cRNA.	9606	HumanHT-12 v3.0 Expression BeadChip array (Illumina) was used.	Standard Illumina scanning protocol	SAMPLE 52	Genomestudio, quantile normalization	GPL6947	Yong-Min,,Huh	Yonsei University	50 Shinchon-ro	Seoul	120-749	South Korea	ftp://ftp.ncbi.nlm.nih.gov/geo/samples/GSM2235nnn/GSM2235746/suppl/GSM2235746_5125398050_E_Grn.idat.gz	48708
GSM2235747	Public on Mar 20 2018	Jul 14 2016	Mar 20 2018	RNA	1	Human gastric cancer	Homo sapiens	tissue: gastric cancer	age: 53	Sex: female	ptstage: T4	pnstage: N2	death: 1	duration overall survival: 12	total RNA	RecoverAll鈩?total nucleic acid isolation kit (Ambion) or the mirVana RNA Isolation Labeling Kit (Ambion) were used. Quality control was performed with NanoDrop 2000 (Thermo Fischer Scientific) and RNA Nano 6000 chip (Agilent).	biotin	Illumina TotalPrep鈩?RNA Amplification Kit was used for synthesis of labeled cRNA.	9606	HumanHT-12 v3.0 Expression BeadChip array (Illumina) was used.	Standard Illumina scanning protocol	SAMPLE 53	Genomestudio, quantile normalization	GPL6947	Yong-Min,,Huh	Yonsei University	50 Shinchon-ro	Seoul	120-749	South Korea	ftp://ftp.ncbi.nlm.nih.gov/geo/samples/GSM2235nnn/GSM2235747/suppl/GSM2235747_5125398050_G_Grn.idat.gz	48708
GSM2235748	Public on Mar 20 2018	Jul 14 2016	Mar 20 2018	RNA	1	Human gastric cancer	Homo sapiens	tissue: gastric cancer	age: 80	Sex: male	ptstage: T4	pnstage: N2	death: 1	duration overall survival: 2	total RNA	RecoverAll鈩?total nucleic acid isolation kit (Ambion) or the mirVana RNA Isolation Labeling Kit (Ambion) were used. Quality control was performed with NanoDrop 2000 (Thermo Fischer Scientific) and RNA Nano 6000 chip (Agilent).	biotin	Illumina TotalPrep鈩?RNA Amplification Kit was used for synthesis of labeled cRNA.	9606	HumanHT-12 v3.0 Expression BeadChip array (Illumina) was used.	Standard Illumina scanning protocol	SAMPLE 54	Genomestudio, quantile normalization	GPL6947	Yong-Min,,Huh	Yonsei University	50 Shinchon-ro	Seoul	120-749	South Korea	ftp://ftp.ncbi.nlm.nih.gov/geo/samples/GSM2235nnn/GSM2235748/suppl/GSM2235748_5125398050_L_Grn.idat.gz	48708
GSM2235749	Public on Mar 20 2018	Jul 14 2016	Mar 20 2018	RNA	1	Human gastric cancer	Homo sapiens	tissue: gastric cancer	age: 65	Sex: male	ptstage: T4	pnstage: N3	death: 1	duration overall survival: 39	total RNA	RecoverAll鈩?total nucleic acid isolation kit (Ambion) or the mirVana RNA Isolation Labeling Kit (Ambion) were used. Quality control was performed with NanoDrop 2000 (Thermo Fischer Scientific) and RNA Nano 6000 chip (Agilent).	biotin	Illumina TotalPrep鈩?RNA Amplification Kit was used for synthesis of labeled cRNA.	9606	HumanHT-12 v3.0 Expression BeadChip array (Illumina) was used.	Standard Illumina scanning protocol	SAMPLE 55	Genomestudio, quantile normalization	GPL6947	Yong-Min,,Huh	Yonsei University	50 Shinchon-ro	Seoul	120-749	South Korea	ftp://ftp.ncbi.nlm.nih.gov/geo/samples/GSM2235nnn/GSM2235749/suppl/GSM2235749_5127220040_K_Grn.idat.gz	48708
GSM2235750	Public on Mar 20 2018	Jul 14 2016	Mar 20 2018	RNA	1	Human gastric cancer	Homo sapiens	tissue: gastric cancer	age: 70	Sex: male	ptstage: T4	pnstage: N1	death: 1	duration overall survival: 7	total RNA	RecoverAll鈩?total nucleic acid isolation kit (Ambion) or the mirVana RNA Isolation Labeling Kit (Ambion) were used. Quality control was performed with NanoDrop 2000 (Thermo Fischer Scientific) and RNA Nano 6000 chip (Agilent).	biotin	Illumina TotalPrep鈩?RNA Amplification Kit was used for synthesis of labeled cRNA.	9606	HumanHT-12 v3.0 Expression BeadChip array (Illumina) was used.	Standard Illumina scanning protocol	SAMPLE 56	Genomestudio, quantile normalization	GPL6947	Yong-Min,,Huh	Yonsei University	50 Shinchon-ro	Seoul	120-749	South Korea	ftp://ftp.ncbi.nlm.nih.gov/geo/samples/GSM2235nnn/GSM2235750/suppl/GSM2235750_5127220045_A_Grn.idat.gz	48708
GSM2235751	Public on Mar 20 2018	Jul 14 2016	Mar 20 2018	RNA	1	Human gastric cancer	Homo sapiens	tissue: gastric cancer	age: 40	Sex: male	ptstage: T3	pnstage: N1	death: 0	duration overall survival: 101	total RNA	RecoverAll鈩?total nucleic acid isolation kit (Ambion) or the mirVana RNA Isolation Labeling Kit (Ambion) were used. Quality control was performed with NanoDrop 2000 (Thermo Fischer Scientific) and RNA Nano 6000 chip (Agilent).	biotin	Illumina TotalPrep鈩?RNA Amplification Kit was used for synthesis of labeled cRNA.	9606	HumanHT-12 v3.0 Expression BeadChip array (Illumina) was used.	Standard Illumina scanning protocol	SAMPLE 57	Genomestudio, quantile normalization	GPL6947	Yong-Min,,Huh	Yonsei University	50 Shinchon-ro	Seoul	120-749	South Korea	ftp://ftp.ncbi.nlm.nih.gov/geo/samples/GSM2235nnn/GSM2235751/suppl/GSM2235751_5127220045_B_Grn.idat.gz	48708
GSM2235752	Public on Mar 20 2018	Jul 14 2016	Mar 20 2018	RNA	1	Human gastric cancer	Homo sapiens	tissue: gastric cancer	age: 42	Sex: male	ptstage: T4	pnstage: N1	death: 0	duration overall survival: 149	total RNA	RecoverAll鈩?total nucleic acid isolation kit (Ambion) or the mirVana RNA Isolation Labeling Kit (Ambion) were used. Quality control was performed with NanoDrop 2000 (Thermo Fischer Scientific) and RNA Nano 6000 chip (Agilent).	biotin	Illumina TotalPrep鈩?RNA Amplification Kit was used for synthesis of labeled cRNA.	9606	HumanHT-12 v3.0 Expression BeadChip array (Illumina) was used.	Standard Illumina scanning protocol	SAMPLE 58	Genomestudio, quantile normalization	GPL6947	Yong-Min,,Huh	Yonsei University	50 Shinchon-ro	Seoul	120-749	South Korea	ftp://ftp.ncbi.nlm.nih.gov/geo/samples/GSM2235nnn/GSM2235752/suppl/GSM2235752_5127220045_C_Grn.idat.gz	48708
GSM2235753	Public on Mar 20 2018	Jul 14 2016	Mar 20 2018	RNA	1	Human gastric cancer	Homo sapiens	tissue: gastric cancer	age: 72	Sex: male	ptstage: T4	pnstage: N1	death: 1	duration overall survival: 31	total RNA	RecoverAll鈩?total nucleic acid isolation kit (Ambion) or the mirVana RNA Isolation Labeling Kit (Ambion) were used. Quality control was performed with NanoDrop 2000 (Thermo Fischer Scientific) and RNA Nano 6000 chip (Agilent).	biotin	Illumina TotalPrep鈩?RNA Amplification Kit was used for synthesis of labeled cRNA.	9606	HumanHT-12 v3.0 Expression BeadChip array (Illumina) was used.	Standard Illumina scanning protocol	SAMPLE 59	Genomestudio, quantile normalization	GPL6947	Yong-Min,,Huh	Yonsei University	50 Shinchon-ro	Seoul	120-749	South Korea	ftp://ftp.ncbi.nlm.nih.gov/geo/samples/GSM2235nnn/GSM2235753/suppl/GSM2235753_5127220045_D_Grn.idat.gz	48708
GSM2235754	Public on Mar 20 2018	Jul 14 2016	Mar 20 2018	RNA	1	Human gastric cancer	Homo sapiens	tissue: gastric cancer	age: 37	Sex: female	ptstage: T4	pnstage: N1	death: 0	duration overall survival: 138	total RNA	RecoverAll鈩?total nucleic acid isolation kit (Ambion) or the mirVana RNA Isolation Labeling Kit (Ambion) were used. Quality control was performed with NanoDrop 2000 (Thermo Fischer Scientific) and RNA Nano 6000 chip (Agilent).	biotin	Illumina TotalPrep鈩?RNA Amplification Kit was used for synthesis of labeled cRNA.	9606	HumanHT-12 v3.0 Expression BeadChip array (Illumina) was used.	Standard Illumina scanning protocol	SAMPLE 60	Genomestudio, quantile normalization	GPL6947	Yong-Min,,Huh	Yonsei University	50 Shinchon-ro	Seoul	120-749	South Korea	ftp://ftp.ncbi.nlm.nih.gov/geo/samples/GSM2235nnn/GSM2235754/suppl/GSM2235754_5127220045_E_Grn.idat.gz	48708
GSM2235755	Public on Mar 20 2018	Jul 14 2016	Mar 20 2018	RNA	1	Human gastric cancer	Homo sapiens	tissue: gastric cancer	age: 62	Sex: female	ptstage: T4	pnstage: N1	death: 1	duration overall survival: 87	total RNA	RecoverAll鈩?total nucleic acid isolation kit (Ambion) or the mirVana RNA Isolation Labeling Kit (Ambion) were used. Quality control was performed with NanoDrop 2000 (Thermo Fischer Scientific) and RNA Nano 6000 chip (Agilent).	biotin	Illumina TotalPrep鈩?RNA Amplification Kit was used for synthesis of labeled cRNA.	9606	HumanHT-12 v3.0 Expression BeadChip array (Illumina) was used.	Standard Illumina scanning protocol	SAMPLE 61	Genomestudio, quantile normalization	GPL6947	Yong-Min,,Huh	Yonsei University	50 Shinchon-ro	Seoul	120-749	South Korea	ftp://ftp.ncbi.nlm.nih.gov/geo/samples/GSM2235nnn/GSM2235755/suppl/GSM2235755_5127220045_F_Grn.idat.gz	48708
GSM2235756	Public on Mar 20 2018	Jul 14 2016	Mar 20 2018	RNA	1	Human gastric cancer	Homo sapiens	tissue: gastric cancer	age: 48	Sex: female	ptstage: T4	pnstage: N2	death: 0	duration overall survival: 140	total RNA	RecoverAll鈩?total nucleic acid isolation kit (Ambion) or the mirVana RNA Isolation Labeling Kit (Ambion) were used. Quality control was performed with NanoDrop 2000 (Thermo Fischer Scientific) and RNA Nano 6000 chip (Agilent).	biotin	Illumina TotalPrep鈩?RNA Amplification Kit was used for synthesis of labeled cRNA.	9606	HumanHT-12 v3.0 Expression BeadChip array (Illumina) was used.	Standard Illumina scanning protocol	SAMPLE 62	Genomestudio, quantile normalization	GPL6947	Yong-Min,,Huh	Yonsei University	50 Shinchon-ro	Seoul	120-749	South Korea	ftp://ftp.ncbi.nlm.nih.gov/geo/samples/GSM2235nnn/GSM2235756/suppl/GSM2235756_5127220045_G_Grn.idat.gz	48708
GSM2235757	Public on Mar 20 2018	Jul 14 2016	Mar 20 2018	RNA	1	Human gastric cancer	Homo sapiens	tissue: gastric cancer	age: 44	Sex: male	ptstage: T4	pnstage: N2	death: 1	duration overall survival: 40	total RNA	RecoverAll鈩?total nucleic acid isolation kit (Ambion) or the mirVana RNA Isolation Labeling Kit (Ambion) were used. Quality control was performed with NanoDrop 2000 (Thermo Fischer Scientific) and RNA Nano 6000 chip (Agilent).	biotin	Illumina TotalPrep鈩?RNA Amplification Kit was used for synthesis of labeled cRNA.	9606	HumanHT-12 v3.0 Expression BeadChip array (Illumina) was used.	Standard Illumina scanning protocol	SAMPLE 63	Genomestudio, quantile normalization	GPL6947	Yong-Min,,Huh	Yonsei University	50 Shinchon-ro	Seoul	120-749	South Korea	ftp://ftp.ncbi.nlm.nih.gov/geo/samples/GSM2235nnn/GSM2235757/suppl/GSM2235757_5127220045_H_Grn.idat.gz	48708
GSM2235758	Public on Mar 20 2018	Jul 14 2016	Mar 20 2018	RNA	1	Human gastric cancer	Homo sapiens	tissue: gastric cancer	age: 42	Sex: male	ptstage: T4	pnstage: N2	death: 1	duration overall survival: 13	total RNA	RecoverAll鈩?total nucleic acid isolation kit (Ambion) or the mirVana RNA Isolation Labeling Kit (Ambion) were used. Quality control was performed with NanoDrop 2000 (Thermo Fischer Scientific) and RNA Nano 6000 chip (Agilent).	biotin	Illumina TotalPrep鈩?RNA Amplification Kit was used for synthesis of labeled cRNA.	9606	HumanHT-12 v3.0 Expression BeadChip array (Illumina) was used.	Standard Illumina scanning protocol	SAMPLE 64	Genomestudio, quantile normalization	GPL6947	Yong-Min,,Huh	Yonsei University	50 Shinchon-ro	Seoul	120-749	South Korea	ftp://ftp.ncbi.nlm.nih.gov/geo/samples/GSM2235nnn/GSM2235758/suppl/GSM2235758_5127220045_I_Grn.idat.gz	48708
GSM2235759	Public on Mar 20 2018	Jul 14 2016	Mar 20 2018	RNA	1	Human gastric cancer	Homo sapiens	tissue: gastric cancer	age: 54	Sex: male	ptstage: T4	pnstage: N2	death: 1	duration overall survival: 12	total RNA	RecoverAll鈩?total nucleic acid isolation kit (Ambion) or the mirVana RNA Isolation Labeling Kit (Ambion) were used. Quality control was performed with NanoDrop 2000 (Thermo Fischer Scientific) and RNA Nano 6000 chip (Agilent).	biotin	Illumina TotalPrep鈩?RNA Amplification Kit was used for synthesis of labeled cRNA.	9606	HumanHT-12 v3.0 Expression BeadChip array (Illumina) was used.	Standard Illumina scanning protocol	SAMPLE 65	Genomestudio, quantile normalization	GPL6947	Yong-Min,,Huh	Yonsei University	50 Shinchon-ro	Seoul	120-749	South Korea	ftp://ftp.ncbi.nlm.nih.gov/geo/samples/GSM2235nnn/GSM2235759/suppl/GSM2235759_5127220045_J_Grn.idat.gz	48708
GSM2235760	Public on Mar 20 2018	Jul 14 2016	Mar 20 2018	RNA	1	Human gastric cancer	Homo sapiens	tissue: gastric cancer	age: 64	Sex: male	ptstage: T4	pnstage: N2	death: 1	duration overall survival: 20	total RNA	RecoverAll鈩?total nucleic acid isolation kit (Ambion) or the mirVana RNA Isolation Labeling Kit (Ambion) were used. Quality control was performed with NanoDrop 2000 (Thermo Fischer Scientific) and RNA Nano 6000 chip (Agilent).	biotin	Illumina TotalPrep鈩?RNA Amplification Kit was used for synthesis of labeled cRNA.	9606	HumanHT-12 v3.0 Expression BeadChip array (Illumina) was used.	Standard Illumina scanning protocol	SAMPLE 66	Genomestudio, quantile normalization	GPL6947	Yong-Min,,Huh	Yonsei University	50 Shinchon-ro	Seoul	120-749	South Korea	ftp://ftp.ncbi.nlm.nih.gov/geo/samples/GSM2235nnn/GSM2235760/suppl/GSM2235760_5127220045_K_Grn.idat.gz	48708
GSM2235761	Public on Mar 20 2018	Jul 14 2016	Mar 20 2018	RNA	1	Human gastric cancer	Homo sapiens	tissue: gastric cancer	age: 63	Sex: female	ptstage: T4	pnstage: N1	death: 0	duration overall survival: 134	total RNA	RecoverAll鈩?total nucleic acid isolation kit (Ambion) or the mirVana RNA Isolation Labeling Kit (Ambion) were used. Quality control was performed with NanoDrop 2000 (Thermo Fischer Scientific) and RNA Nano 6000 chip (Agilent).	biotin	Illumina TotalPrep鈩?RNA Amplification Kit was used for synthesis of labeled cRNA.	9606	HumanHT-12 v3.0 Expression BeadChip array (Illumina) was used.	Standard Illumina scanning protocol	SAMPLE 67	Genomestudio, quantile normalization	GPL6947	Yong-Min,,Huh	Yonsei University	50 Shinchon-ro	Seoul	120-749	South Korea	ftp://ftp.ncbi.nlm.nih.gov/geo/samples/GSM2235nnn/GSM2235761/suppl/GSM2235761_5127220045_L_Grn.idat.gz	48708
GSM2235762	Public on Mar 20 2018	Jul 14 2016	Mar 20 2018	RNA	1	Human gastric cancer	Homo sapiens	tissue: gastric cancer	age: 65	Sex: male	ptstage: T4	pnstage: N2	death: 1	duration overall survival: 39	total RNA	RecoverAll鈩?total nucleic acid isolation kit (Ambion) or the mirVana RNA Isolation Labeling Kit (Ambion) were used. Quality control was performed with NanoDrop 2000 (Thermo Fischer Scientific) and RNA Nano 6000 chip (Agilent).	biotin	Illumina TotalPrep鈩?RNA Amplification Kit was used for synthesis of labeled cRNA.	9606	HumanHT-12 v3.0 Expression BeadChip array (Illumina) was used.	Standard Illumina scanning protocol	SAMPLE 68	Genomestudio, quantile normalization	GPL6947	Yong-Min,,Huh	Yonsei University	50 Shinchon-ro	Seoul	120-749	South Korea	ftp://ftp.ncbi.nlm.nih.gov/geo/samples/GSM2235nnn/GSM2235762/suppl/GSM2235762_5127220051_E_Grn.idat.gz	48708
GSM2235763	Public on Mar 20 2018	Jul 14 2016	Mar 20 2018	RNA	1	Human gastric cancer	Homo sapiens	tissue: gastric cancer	age: 74	Sex: female	ptstage: T4	pnstage: N1	death: 1	duration overall survival: 109	total RNA	RecoverAll鈩?total nucleic acid isolation kit (Ambion) or the mirVana RNA Isolation Labeling Kit (Ambion) were used. Quality control was performed with NanoDrop 2000 (Thermo Fischer Scientific) and RNA Nano 6000 chip (Agilent).	biotin	Illumina TotalPrep鈩?RNA Amplification Kit was used for synthesis of labeled cRNA.	9606	HumanHT-12 v3.0 Expression BeadChip array (Illumina) was used.	Standard Illumina scanning protocol	SAMPLE 69	Genomestudio, quantile normalization	GPL6947	Yong-Min,,Huh	Yonsei University	50 Shinchon-ro	Seoul	120-749	South Korea	ftp://ftp.ncbi.nlm.nih.gov/geo/samples/GSM2235nnn/GSM2235763/suppl/GSM2235763_5127220051_F_Grn.idat.gz	48708
GSM2235764	Public on Mar 20 2018	Jul 14 2016	Mar 20 2018	RNA	1	Human gastric cancer	Homo sapiens	tissue: gastric cancer	age: 58	Sex: male	ptstage: T4	pnstage: N2	death: 1	duration overall survival: 9	total RNA	RecoverAll鈩?total nucleic acid isolation kit (Ambion) or the mirVana RNA Isolation Labeling Kit (Ambion) were used. Quality control was performed with NanoDrop 2000 (Thermo Fischer Scientific) and RNA Nano 6000 chip (Agilent).	biotin	Illumina TotalPrep鈩?RNA Amplification Kit was used for synthesis of labeled cRNA.	9606	HumanHT-12 v3.0 Expression BeadChip array (Illumina) was used.	Standard Illumina scanning protocol	SAMPLE 70	Genomestudio, quantile normalization	GPL6947	Yong-Min,,Huh	Yonsei University	50 Shinchon-ro	Seoul	120-749	South Korea	ftp://ftp.ncbi.nlm.nih.gov/geo/samples/GSM2235nnn/GSM2235764/suppl/GSM2235764_5127220051_G_Grn.idat.gz	48708
GSM2235765	Public on Mar 20 2018	Jul 14 2016	Mar 20 2018	RNA	1	Human gastric cancer	Homo sapiens	tissue: gastric cancer	age: 68	Sex: male	ptstage: T4	pnstage: N1	death: 0	duration overall survival: 138	total RNA	RecoverAll鈩?total nucleic acid isolation kit (Ambion) or the mirVana RNA Isolation Labeling Kit (Ambion) were used. Quality control was performed with NanoDrop 2000 (Thermo Fischer Scientific) and RNA Nano 6000 chip (Agilent).	biotin	Illumina TotalPrep鈩?RNA Amplification Kit was used for synthesis of labeled cRNA.	9606	HumanHT-12 v3.0 Expression BeadChip array (Illumina) was used.	Standard Illumina scanning protocol	SAMPLE 71	Genomestudio, quantile normalization	GPL6947	Yong-Min,,Huh	Yonsei University	50 Shinchon-ro	Seoul	120-749	South Korea	ftp://ftp.ncbi.nlm.nih.gov/geo/samples/GSM2235nnn/GSM2235765/suppl/GSM2235765_5127220051_H_Grn.idat.gz	48708
GSM2235766	Public on Mar 20 2018	Jul 14 2016	Mar 20 2018	RNA	1	Human gastric cancer	Homo sapiens	tissue: gastric cancer	age: 61	Sex: male	ptstage: T4	pnstage: N2	death: 1	duration overall survival: 15	total RNA	RecoverAll鈩?total nucleic acid isolation kit (Ambion) or the mirVana RNA Isolation Labeling Kit (Ambion) were used. Quality control was performed with NanoDrop 2000 (Thermo Fischer Scientific) and RNA Nano 6000 chip (Agilent).	biotin	Illumina TotalPrep鈩?RNA Amplification Kit was used for synthesis of labeled cRNA.	9606	HumanHT-12 v3.0 Expression BeadChip array (Illumina) was used.	Standard Illumina scanning protocol	SAMPLE 72	Genomestudio, quantile normalization	GPL6947	Yong-Min,,Huh	Yonsei University	50 Shinchon-ro	Seoul	120-749	South Korea	ftp://ftp.ncbi.nlm.nih.gov/geo/samples/GSM2235nnn/GSM2235766/suppl/GSM2235766_5127220051_I_Grn.idat.gz	48708
GSM2235767	Public on Mar 20 2018	Jul 14 2016	Mar 20 2018	RNA	1	Human gastric cancer	Homo sapiens	tissue: gastric cancer	age: 53	Sex: male	ptstage: T4	pnstage: N2	death: 1	duration overall survival: 18	total RNA	RecoverAll鈩?total nucleic acid isolation kit (Ambion) or the mirVana RNA Isolation Labeling Kit (Ambion) were used. Quality control was performed with NanoDrop 2000 (Thermo Fischer Scientific) and RNA Nano 6000 chip (Agilent).	biotin	Illumina TotalPrep鈩?RNA Amplification Kit was used for synthesis of labeled cRNA.	9606	HumanHT-12 v3.0 Expression BeadChip array (Illumina) was used.	Standard Illumina scanning protocol	SAMPLE 73	Genomestudio, quantile normalization	GPL6947	Yong-Min,,Huh	Yonsei University	50 Shinchon-ro	Seoul	120-749	South Korea	ftp://ftp.ncbi.nlm.nih.gov/geo/samples/GSM2235nnn/GSM2235767/suppl/GSM2235767_5127220051_J_Grn.idat.gz	48708
GSM2235768	Public on Mar 20 2018	Jul 14 2016	Mar 20 2018	RNA	1	Human gastric cancer	Homo sapiens	tissue: gastric cancer	age: 46	Sex: male	ptstage: T4	pnstage: N1	death: 0	duration overall survival: 144	total RNA	RecoverAll鈩?total nucleic acid isolation kit (Ambion) or the mirVana RNA Isolation Labeling Kit (Ambion) were used. Quality control was performed with NanoDrop 2000 (Thermo Fischer Scientific) and RNA Nano 6000 chip (Agilent).	biotin	Illumina TotalPrep鈩?RNA Amplification Kit was used for synthesis of labeled cRNA.	9606	HumanHT-12 v3.0 Expression BeadChip array (Illumina) was used.	Standard Illumina scanning protocol	SAMPLE 74	Genomestudio, quantile normalization	GPL6947	Yong-Min,,Huh	Yonsei University	50 Shinchon-ro	Seoul	120-749	South Korea	ftp://ftp.ncbi.nlm.nih.gov/geo/samples/GSM2235nnn/GSM2235768/suppl/GSM2235768_5127220051_K_Grn.idat.gz	48708
GSM2235769	Public on Mar 20 2018	Jul 14 2016	Mar 20 2018	RNA	1	Human gastric cancer	Homo sapiens	tissue: gastric cancer	age: 64	Sex: male	ptstage: T3	pnstage: N2	death: 1	duration overall survival: 22	total RNA	RecoverAll鈩?total nucleic acid isolation kit (Ambion) or the mirVana RNA Isolation Labeling Kit (Ambion) were used. Quality control was performed with NanoDrop 2000 (Thermo Fischer Scientific) and RNA Nano 6000 chip (Agilent).	biotin	Illumina TotalPrep鈩?RNA Amplification Kit was used for synthesis of labeled cRNA.	9606	HumanHT-12 v3.0 Expression BeadChip array (Illumina) was used.	Standard Illumina scanning protocol	SAMPLE 75	Genomestudio, quantile normalization	GPL6947	Yong-Min,,Huh	Yonsei University	50 Shinchon-ro	Seoul	120-749	South Korea	ftp://ftp.ncbi.nlm.nih.gov/geo/samples/GSM2235nnn/GSM2235769/suppl/GSM2235769_5127220051_L_Grn.idat.gz	48708
GSM2235770	Public on Mar 20 2018	Jul 14 2016	Mar 20 2018	RNA	1	Human gastric cancer	Homo sapiens	tissue: gastric cancer	age: 85	Sex: male	ptstage: T3	pnstage: N1	death: 1	duration overall survival: 7	total RNA	RecoverAll鈩?total nucleic acid isolation kit (Ambion) or the mirVana RNA Isolation Labeling Kit (Ambion) were used. Quality control was performed with NanoDrop 2000 (Thermo Fischer Scientific) and RNA Nano 6000 chip (Agilent).	biotin	Illumina TotalPrep鈩?RNA Amplification Kit was used for synthesis of labeled cRNA.	9606	HumanHT-12 v3.0 Expression BeadChip array (Illumina) was used.	Standard Illumina scanning protocol	SAMPLE 76	Genomestudio, quantile normalization	GPL6947	Yong-Min,,Huh	Yonsei University	50 Shinchon-ro	Seoul	120-749	South Korea	ftp://ftp.ncbi.nlm.nih.gov/geo/samples/GSM2235nnn/GSM2235770/suppl/GSM2235770_5139124016_E_Grn.idat.gz	48708
GSM2235771	Public on Mar 20 2018	Jul 14 2016	Mar 20 2018	RNA	1	Human gastric cancer	Homo sapiens	tissue: gastric cancer	age: 53	Sex: male	ptstage: T4	pnstage: N1	death: 0	duration overall survival: 143	total RNA	RecoverAll鈩?total nucleic acid isolation kit (Ambion) or the mirVana RNA Isolation Labeling Kit (Ambion) were used. Quality control was performed with NanoDrop 2000 (Thermo Fischer Scientific) and RNA Nano 6000 chip (Agilent).	biotin	Illumina TotalPrep鈩?RNA Amplification Kit was used for synthesis of labeled cRNA.	9606	HumanHT-12 v3.0 Expression BeadChip array (Illumina) was used.	Standard Illumina scanning protocol	SAMPLE 77	Genomestudio, quantile normalization	GPL6947	Yong-Min,,Huh	Yonsei University	50 Shinchon-ro	Seoul	120-749	South Korea	ftp://ftp.ncbi.nlm.nih.gov/geo/samples/GSM2235nnn/GSM2235771/suppl/GSM2235771_5139124016_F_Grn.idat.gz	48708
GSM2235772	Public on Mar 20 2018	Jul 14 2016	Mar 20 2018	RNA	1	Human gastric cancer	Homo sapiens	tissue: gastric cancer	age: 60	Sex: male	ptstage: T4	pnstage: N2	death: 1	duration overall survival: 60	total RNA	RecoverAll鈩?total nucleic acid isolation kit (Ambion) or the mirVana RNA Isolation Labeling Kit (Ambion) were used. Quality control was performed with NanoDrop 2000 (Thermo Fischer Scientific) and RNA Nano 6000 chip (Agilent).	biotin	Illumina TotalPrep鈩?RNA Amplification Kit was used for synthesis of labeled cRNA.	9606	HumanHT-12 v3.0 Expression BeadChip array (Illumina) was used.	Standard Illumina scanning protocol	SAMPLE 78	Genomestudio, quantile normalization	GPL6947	Yong-Min,,Huh	Yonsei University	50 Shinchon-ro	Seoul	120-749	South Korea	ftp://ftp.ncbi.nlm.nih.gov/geo/samples/GSM2235nnn/GSM2235772/suppl/GSM2235772_5139124016_G_Grn.idat.gz	48708
GSM2235773	Public on Mar 20 2018	Jul 14 2016	Mar 20 2018	RNA	1	Human gastric cancer	Homo sapiens	tissue: gastric cancer	age: 30	Sex: male	ptstage: T4	pnstage: N2	death: 1	duration overall survival: 17	total RNA	RecoverAll鈩?total nucleic acid isolation kit (Ambion) or the mirVana RNA Isolation Labeling Kit (Ambion) were used. Quality control was performed with NanoDrop 2000 (Thermo Fischer Scientific) and RNA Nano 6000 chip (Agilent).	biotin	Illumina TotalPrep鈩?RNA Amplification Kit was used for synthesis of labeled cRNA.	9606	HumanHT-12 v3.0 Expression BeadChip array (Illumina) was used.	Standard Illumina scanning protocol	SAMPLE 79	Genomestudio, quantile normalization	GPL6947	Yong-Min,,Huh	Yonsei University	50 Shinchon-ro	Seoul	120-749	South Korea	ftp://ftp.ncbi.nlm.nih.gov/geo/samples/GSM2235nnn/GSM2235773/suppl/GSM2235773_5139124016_H_Grn.idat.gz	48708
GSM2235774	Public on Mar 20 2018	Jul 14 2016	Mar 20 2018	RNA	1	Human gastric cancer	Homo sapiens	tissue: gastric cancer	age: 47	Sex: male	ptstage: T4	pnstage: N1	death: 1	duration overall survival: 12	total RNA	RecoverAll鈩?total nucleic acid isolation kit (Ambion) or the mirVana RNA Isolation Labeling Kit (Ambion) were used. Quality control was performed with NanoDrop 2000 (Thermo Fischer Scientific) and RNA Nano 6000 chip (Agilent).	biotin	Illumina TotalPrep鈩?RNA Amplification Kit was used for synthesis of labeled cRNA.	9606	HumanHT-12 v3.0 Expression BeadChip array (Illumina) was used.	Standard Illumina scanning protocol	SAMPLE 80	Genomestudio, quantile normalization	GPL6947	Yong-Min,,Huh	Yonsei University	50 Shinchon-ro	Seoul	120-749	South Korea	ftp://ftp.ncbi.nlm.nih.gov/geo/samples/GSM2235nnn/GSM2235774/suppl/GSM2235774_5139124016_I_Grn.idat.gz	48708
GSM2235775	Public on Mar 20 2018	Jul 14 2016	Mar 20 2018	RNA	1	Human gastric cancer	Homo sapiens	tissue: gastric cancer	age: 60	Sex: male	ptstage: T4	pnstage: N1	death: 0	duration overall survival: 120	total RNA	RecoverAll鈩?total nucleic acid isolation kit (Ambion) or the mirVana RNA Isolation Labeling Kit (Ambion) were used. Quality control was performed with NanoDrop 2000 (Thermo Fischer Scientific) and RNA Nano 6000 chip (Agilent).	biotin	Illumina TotalPrep鈩?RNA Amplification Kit was used for synthesis of labeled cRNA.	9606	HumanHT-12 v3.0 Expression BeadChip array (Illumina) was used.	Standard Illumina scanning protocol	SAMPLE 81	Genomestudio, quantile normalization	GPL6947	Yong-Min,,Huh	Yonsei University	50 Shinchon-ro	Seoul	120-749	South Korea	ftp://ftp.ncbi.nlm.nih.gov/geo/samples/GSM2235nnn/GSM2235775/suppl/GSM2235775_5139124016_J_Grn.idat.gz	48708
GSM2235776	Public on Mar 20 2018	Jul 14 2016	Mar 20 2018	RNA	1	Human gastric cancer	Homo sapiens	tissue: gastric cancer	age: 80	Sex: male	ptstage: T4	pnstage: N0	death: 1	duration overall survival: 20	total RNA	RecoverAll鈩?total nucleic acid isolation kit (Ambion) or the mirVana RNA Isolation Labeling Kit (Ambion) were used. Quality control was performed with NanoDrop 2000 (Thermo Fischer Scientific) and RNA Nano 6000 chip (Agilent).	biotin	Illumina TotalPrep鈩?RNA Amplification Kit was used for synthesis of labeled cRNA.	9606	HumanHT-12 v3.0 Expression BeadChip array (Illumina) was used.	Standard Illumina scanning protocol	SAMPLE 82	Genomestudio, quantile normalization	GPL6947	Yong-Min,,Huh	Yonsei University	50 Shinchon-ro	Seoul	120-749	South Korea	ftp://ftp.ncbi.nlm.nih.gov/geo/samples/GSM2235nnn/GSM2235776/suppl/GSM2235776_5139124016_K_Grn.idat.gz	48708
GSM2235777	Public on Mar 20 2018	Jul 14 2016	Mar 20 2018	RNA	1	Human gastric cancer	Homo sapiens	tissue: gastric cancer	age: 49	Sex: female	ptstage: T4	pnstage: N1	death: 1	duration overall survival: 115	total RNA	RecoverAll鈩?total nucleic acid isolation kit (Ambion) or the mirVana RNA Isolation Labeling Kit (Ambion) were used. Quality control was performed with NanoDrop 2000 (Thermo Fischer Scientific) and RNA Nano 6000 chip (Agilent).	biotin	Illumina TotalPrep鈩?RNA Amplification Kit was used for synthesis of labeled cRNA.	9606	HumanHT-12 v3.0 Expression BeadChip array (Illumina) was used.	Standard Illumina scanning protocol	SAMPLE 83	Genomestudio, quantile normalization	GPL6947	Yong-Min,,Huh	Yonsei University	50 Shinchon-ro	Seoul	120-749	South Korea	ftp://ftp.ncbi.nlm.nih.gov/geo/samples/GSM2235nnn/GSM2235777/suppl/GSM2235777_5139124016_L_Grn.idat.gz	48708
GSM2235778	Public on Mar 20 2018	Jul 14 2016	Mar 20 2018	RNA	1	Human gastric cancer	Homo sapiens	tissue: gastric cancer	age: 61	Sex: male	ptstage: T4	pnstage: N3	death: 1	duration overall survival: 23	total RNA	RecoverAll鈩?total nucleic acid isolation kit (Ambion) or the mirVana RNA Isolation Labeling Kit (Ambion) were used. Quality control was performed with NanoDrop 2000 (Thermo Fischer Scientific) and RNA Nano 6000 chip (Agilent).	biotin	Illumina TotalPrep鈩?RNA Amplification Kit was used for synthesis of labeled cRNA.	9606	HumanHT-12 v3.0 Expression BeadChip array (Illumina) was used.	Standard Illumina scanning protocol	SAMPLE 84	Genomestudio, quantile normalization	GPL6947	Yong-Min,,Huh	Yonsei University	50 Shinchon-ro	Seoul	120-749	South Korea	ftp://ftp.ncbi.nlm.nih.gov/geo/samples/GSM2235nnn/GSM2235778/suppl/GSM2235778_5168697002_A_Grn.idat.gz	48708
GSM2235779	Public on Mar 20 2018	Jul 14 2016	Mar 20 2018	RNA	1	Human gastric cancer	Homo sapiens	tissue: gastric cancer	age: 63	Sex: male	ptstage: T4	pnstage: N0	death: 1	duration overall survival: 49	total RNA	RecoverAll鈩?total nucleic acid isolation kit (Ambion) or the mirVana RNA Isolation Labeling Kit (Ambion) were used. Quality control was performed with NanoDrop 2000 (Thermo Fischer Scientific) and RNA Nano 6000 chip (Agilent).	biotin	Illumina TotalPrep鈩?RNA Amplification Kit was used for synthesis of labeled cRNA.	9606	HumanHT-12 v3.0 Expression BeadChip array (Illumina) was used.	Standard Illumina scanning protocol	SAMPLE 85	Genomestudio, quantile normalization	GPL6947	Yong-Min,,Huh	Yonsei University	50 Shinchon-ro	Seoul	120-749	South Korea	ftp://ftp.ncbi.nlm.nih.gov/geo/samples/GSM2235nnn/GSM2235779/suppl/GSM2235779_5168697002_C_Grn.idat.gz	48708
GSM2235780	Public on Mar 20 2018	Jul 14 2016	Mar 20 2018	RNA	1	Human gastric cancer	Homo sapiens	tissue: gastric cancer	age: 75	Sex: male	ptstage: T4	pnstage: N3	death: 1	duration overall survival: 0	total RNA	RecoverAll鈩?total nucleic acid isolation kit (Ambion) or the mirVana RNA Isolation Labeling Kit (Ambion) were used. Quality control was performed with NanoDrop 2000 (Thermo Fischer Scientific) and RNA Nano 6000 chip (Agilent).	biotin	Illumina TotalPrep鈩?RNA Amplification Kit was used for synthesis of labeled cRNA.	9606	HumanHT-12 v3.0 Expression BeadChip array (Illumina) was used.	Standard Illumina scanning protocol	SAMPLE 86	Genomestudio, quantile normalization	GPL6947	Yong-Min,,Huh	Yonsei University	50 Shinchon-ro	Seoul	120-749	South Korea	ftp://ftp.ncbi.nlm.nih.gov/geo/samples/GSM2235nnn/GSM2235780/suppl/GSM2235780_5168697002_D_Grn.idat.gz	48708
GSM2235781	Public on Mar 20 2018	Jul 14 2016	Mar 20 2018	RNA	1	Human gastric cancer	Homo sapiens	tissue: gastric cancer	age: 56	Sex: male	ptstage: T1	pnstage: N0	death: 0	duration overall survival: 115	total RNA	RecoverAll鈩?total nucleic acid isolation kit (Ambion) or the mirVana RNA Isolation Labeling Kit (Ambion) were used. Quality control was performed with NanoDrop 2000 (Thermo Fischer Scientific) and RNA Nano 6000 chip (Agilent).	biotin	Illumina TotalPrep鈩?RNA Amplification Kit was used for synthesis of labeled cRNA.	9606	HumanHT-12 v3.0 Expression BeadChip array (Illumina) was used.	Standard Illumina scanning protocol	SAMPLE 87	Genomestudio, quantile normalization	GPL6947	Yong-Min,,Huh	Yonsei University	50 Shinchon-ro	Seoul	120-749	South Korea	ftp://ftp.ncbi.nlm.nih.gov/geo/samples/GSM2235nnn/GSM2235781/suppl/GSM2235781_5168697002_E_Grn.idat.gz	48708
GSM2235782	Public on Mar 20 2018	Jul 14 2016	Mar 20 2018	RNA	1	Human gastric cancer	Homo sapiens	tissue: gastric cancer	age: 62	Sex: male	ptstage: T4	pnstage: N2	death: 1	duration overall survival: 4	total RNA	RecoverAll鈩?total nucleic acid isolation kit (Ambion) or the mirVana RNA Isolation Labeling Kit (Ambion) were used. Quality control was performed with NanoDrop 2000 (Thermo Fischer Scientific) and RNA Nano 6000 chip (Agilent).	biotin	Illumina TotalPrep鈩?RNA Amplification Kit was used for synthesis of labeled cRNA.	9606	HumanHT-12 v3.0 Expression BeadChip array (Illumina) was used.	Standard Illumina scanning protocol	SAMPLE 88	Genomestudio, quantile normalization	GPL6947	Yong-Min,,Huh	Yonsei University	50 Shinchon-ro	Seoul	120-749	South Korea	ftp://ftp.ncbi.nlm.nih.gov/geo/samples/GSM2235nnn/GSM2235782/suppl/GSM2235782_5168697002_F_Grn.idat.gz	48708
GSM2235783	Public on Mar 20 2018	Jul 14 2016	Mar 20 2018	RNA	1	Human gastric cancer	Homo sapiens	tissue: gastric cancer	age: 71	Sex: male	ptstage: T3	pnstage: N1	death: 1	duration overall survival: 75	total RNA	RecoverAll鈩?total nucleic acid isolation kit (Ambion) or the mirVana RNA Isolation Labeling Kit (Ambion) were used. Quality control was performed with NanoDrop 2000 (Thermo Fischer Scientific) and RNA Nano 6000 chip (Agilent).	biotin	Illumina TotalPrep鈩?RNA Amplification Kit was used for synthesis of labeled cRNA.	9606	HumanHT-12 v3.0 Expression BeadChip array (Illumina) was used.	Standard Illumina scanning protocol	SAMPLE 89	Genomestudio, quantile normalization	GPL6947	Yong-Min,,Huh	Yonsei University	50 Shinchon-ro	Seoul	120-749	South Korea	ftp://ftp.ncbi.nlm.nih.gov/geo/samples/GSM2235nnn/GSM2235783/suppl/GSM2235783_5168697002_G_Grn.idat.gz	48708
GSM2235784	Public on Mar 20 2018	Jul 14 2016	Mar 20 2018	RNA	1	Human gastric cancer	Homo sapiens	tissue: gastric cancer	age: 80	Sex: male	ptstage: T2	pnstage: N0	death: 1	duration overall survival: 103	total RNA	RecoverAll鈩?total nucleic acid isolation kit (Ambion) or the mirVana RNA Isolation Labeling Kit (Ambion) were used. Quality control was performed with NanoDrop 2000 (Thermo Fischer Scientific) and RNA Nano 6000 chip (Agilent).	biotin	Illumina TotalPrep鈩?RNA Amplification Kit was used for synthesis of labeled cRNA.	9606	HumanHT-12 v3.0 Expression BeadChip array (Illumina) was used.	Standard Illumina scanning protocol	SAMPLE 90	Genomestudio, quantile normalization	GPL6947	Yong-Min,,Huh	Yonsei University	50 Shinchon-ro	Seoul	120-749	South Korea	ftp://ftp.ncbi.nlm.nih.gov/geo/samples/GSM2235nnn/GSM2235784/suppl/GSM2235784_5168697002_I_Grn.idat.gz	48708
GSM2235785	Public on Mar 20 2018	Jul 14 2016	Mar 20 2018	RNA	1	Human gastric cancer	Homo sapiens	tissue: gastric cancer	age: 64	Sex: female	ptstage: T3	pnstage: N0	death: 0	duration overall survival: 114	total RNA	RecoverAll鈩?total nucleic acid isolation kit (Ambion) or the mirVana RNA Isolation Labeling Kit (Ambion) were used. Quality control was performed with NanoDrop 2000 (Thermo Fischer Scientific) and RNA Nano 6000 chip (Agilent).	biotin	Illumina TotalPrep鈩?RNA Amplification Kit was used for synthesis of labeled cRNA.	9606	HumanHT-12 v3.0 Expression BeadChip array (Illumina) was used.	Standard Illumina scanning protocol	SAMPLE 91	Genomestudio, quantile normalization	GPL6947	Yong-Min,,Huh	Yonsei University	50 Shinchon-ro	Seoul	120-749	South Korea	ftp://ftp.ncbi.nlm.nih.gov/geo/samples/GSM2235nnn/GSM2235785/suppl/GSM2235785_5168697002_K_Grn.idat.gz	48708
GSM2235786	Public on Mar 20 2018	Jul 14 2016	Mar 20 2018	RNA	1	Human gastric cancer	Homo sapiens	tissue: gastric cancer	age: 50	Sex: female	ptstage: T4	pnstage: N1	death: 0	duration overall survival: 108	total RNA	RecoverAll鈩?total nucleic acid isolation kit (Ambion) or the mirVana RNA Isolation Labeling Kit (Ambion) were used. Quality control was performed with NanoDrop 2000 (Thermo Fischer Scientific) and RNA Nano 6000 chip (Agilent).	biotin	Illumina TotalPrep鈩?RNA Amplification Kit was used for synthesis of labeled cRNA.	9606	HumanHT-12 v3.0 Expression BeadChip array (Illumina) was used.	Standard Illumina scanning protocol	SAMPLE 92	Genomestudio, quantile normalization	GPL6947	Yong-Min,,Huh	Yonsei University	50 Shinchon-ro	Seoul	120-749	South Korea	ftp://ftp.ncbi.nlm.nih.gov/geo/samples/GSM2235nnn/GSM2235786/suppl/GSM2235786_5168697004_A_Grn.idat.gz	48708
GSM2235787	Public on Mar 20 2018	Jul 14 2016	Mar 20 2018	RNA	1	Human gastric cancer	Homo sapiens	tissue: gastric cancer	age: 58	Sex: female	ptstage: T4	pnstage: N2	death: 1	duration overall survival: 25	total RNA	RecoverAll鈩?total nucleic acid isolation kit (Ambion) or the mirVana RNA Isolation Labeling Kit (Ambion) were used. Quality control was performed with NanoDrop 2000 (Thermo Fischer Scientific) and RNA Nano 6000 chip (Agilent).	biotin	Illumina TotalPrep鈩?RNA Amplification Kit was used for synthesis of labeled cRNA.	9606	HumanHT-12 v3.0 Expression BeadChip array (Illumina) was used.	Standard Illumina scanning protocol	SAMPLE 93	Genomestudio, quantile normalization	GPL6947	Yong-Min,,Huh	Yonsei University	50 Shinchon-ro	Seoul	120-749	South Korea	ftp://ftp.ncbi.nlm.nih.gov/geo/samples/GSM2235nnn/GSM2235787/suppl/GSM2235787_5168697004_B_Grn.idat.gz	48708
GSM2235788	Public on Mar 20 2018	Jul 14 2016	Mar 20 2018	RNA	1	Human gastric cancer	Homo sapiens	tissue: gastric cancer	age: 56	Sex: male	ptstage: T2	pnstage: N0	death: 0	duration overall survival: 117	total RNA	RecoverAll鈩?total nucleic acid isolation kit (Ambion) or the mirVana RNA Isolation Labeling Kit (Ambion) were used. Quality control was performed with NanoDrop 2000 (Thermo Fischer Scientific) and RNA Nano 6000 chip (Agilent).	biotin	Illumina TotalPrep鈩?RNA Amplification Kit was used for synthesis of labeled cRNA.	9606	HumanHT-12 v3.0 Expression BeadChip array (Illumina) was used.	Standard Illumina scanning protocol	SAMPLE 94	Genomestudio, quantile normalization	GPL6947	Yong-Min,,Huh	Yonsei University	50 Shinchon-ro	Seoul	120-749	South Korea	ftp://ftp.ncbi.nlm.nih.gov/geo/samples/GSM2235nnn/GSM2235788/suppl/GSM2235788_5168697004_C_Grn.idat.gz	48708
GSM2235789	Public on Mar 20 2018	Jul 14 2016	Mar 20 2018	RNA	1	Human gastric cancer	Homo sapiens	tissue: gastric cancer	age: 64	Sex: male	ptstage: T4	pnstage: N2	death: 1	duration overall survival: 37	total RNA	RecoverAll鈩?total nucleic acid isolation kit (Ambion) or the mirVana RNA Isolation Labeling Kit (Ambion) were used. Quality control was performed with NanoDrop 2000 (Thermo Fischer Scientific) and RNA Nano 6000 chip (Agilent).	biotin	Illumina TotalPrep鈩?RNA Amplification Kit was used for synthesis of labeled cRNA.	9606	HumanHT-12 v3.0 Expression BeadChip array (Illumina) was used.	Standard Illumina scanning protocol	SAMPLE 95	Genomestudio, quantile normalization	GPL6947	Yong-Min,,Huh	Yonsei University	50 Shinchon-ro	Seoul	120-749	South Korea	ftp://ftp.ncbi.nlm.nih.gov/geo/samples/GSM2235nnn/GSM2235789/suppl/GSM2235789_5168697004_E_Grn.idat.gz	48708
GSM2235790	Public on Mar 20 2018	Jul 14 2016	Mar 20 2018	RNA	1	Human gastric cancer	Homo sapiens	tissue: gastric cancer	age: 67	Sex: female	ptstage: T4	pnstage: N0	death: 0	duration overall survival: 119	total RNA	RecoverAll鈩?total nucleic acid isolation kit (Ambion) or the mirVana RNA Isolation Labeling Kit (Ambion) were used. Quality control was performed with NanoDrop 2000 (Thermo Fischer Scientific) and RNA Nano 6000 chip (Agilent).	biotin	Illumina TotalPrep鈩?RNA Amplification Kit was used for synthesis of labeled cRNA.	9606	HumanHT-12 v3.0 Expression BeadChip array (Illumina) was used.	Standard Illumina scanning protocol	SAMPLE 96	Genomestudio, quantile normalization	GPL6947	Yong-Min,,Huh	Yonsei University	50 Shinchon-ro	Seoul	120-749	South Korea	ftp://ftp.ncbi.nlm.nih.gov/geo/samples/GSM2235nnn/GSM2235790/suppl/GSM2235790_5168697004_F_Grn.idat.gz	48708
GSM2235791	Public on Mar 20 2018	Jul 14 2016	Mar 20 2018	RNA	1	Human gastric cancer	Homo sapiens	tissue: gastric cancer	age: 36	Sex: female	ptstage: T4	pnstage: N1	death: 1	duration overall survival: 25	total RNA	RecoverAll鈩?total nucleic acid isolation kit (Ambion) or the mirVana RNA Isolation Labeling Kit (Ambion) were used. Quality control was performed with NanoDrop 2000 (Thermo Fischer Scientific) and RNA Nano 6000 chip (Agilent).	biotin	Illumina TotalPrep鈩?RNA Amplification Kit was used for synthesis of labeled cRNA.	9606	HumanHT-12 v3.0 Expression BeadChip array (Illumina) was used.	Standard Illumina scanning protocol	SAMPLE 97	Genomestudio, quantile normalization	GPL6947	Yong-Min,,Huh	Yonsei University	50 Shinchon-ro	Seoul	120-749	South Korea	ftp://ftp.ncbi.nlm.nih.gov/geo/samples/GSM2235nnn/GSM2235791/suppl/GSM2235791_5168697004_H_Grn.idat.gz	48708
GSM2235792	Public on Mar 20 2018	Jul 14 2016	Mar 20 2018	RNA	1	Human gastric cancer	Homo sapiens	tissue: gastric cancer	age: 60	Sex: female	ptstage: T4	pnstage: N1	death: 1	duration overall survival: 92	total RNA	RecoverAll鈩?total nucleic acid isolation kit (Ambion) or the mirVana RNA Isolation Labeling Kit (Ambion) were used. Quality control was performed with NanoDrop 2000 (Thermo Fischer Scientific) and RNA Nano 6000 chip (Agilent).	biotin	Illumina TotalPrep鈩?RNA Amplification Kit was used for synthesis of labeled cRNA.	9606	HumanHT-12 v3.0 Expression BeadChip array (Illumina) was used.	Standard Illumina scanning protocol	SAMPLE 98	Genomestudio, quantile normalization	GPL6947	Yong-Min,,Huh	Yonsei University	50 Shinchon-ro	Seoul	120-749	South Korea	ftp://ftp.ncbi.nlm.nih.gov/geo/samples/GSM2235nnn/GSM2235792/suppl/GSM2235792_5168697004_I_Grn.idat.gz	48708
GSM2235793	Public on Mar 20 2018	Jul 14 2016	Mar 20 2018	RNA	1	Human gastric cancer	Homo sapiens	tissue: gastric cancer	age: 83	Sex: male	ptstage: T3	pnstage: N2	death: 1	duration overall survival: 87	total RNA	RecoverAll鈩?total nucleic acid isolation kit (Ambion) or the mirVana RNA Isolation Labeling Kit (Ambion) were used. Quality control was performed with NanoDrop 2000 (Thermo Fischer Scientific) and RNA Nano 6000 chip (Agilent).	biotin	Illumina TotalPrep鈩?RNA Amplification Kit was used for synthesis of labeled cRNA.	9606	HumanHT-12 v3.0 Expression BeadChip array (Illumina) was used.	Standard Illumina scanning protocol	SAMPLE 99	Genomestudio, quantile normalization	GPL6947	Yong-Min,,Huh	Yonsei University	50 Shinchon-ro	Seoul	120-749	South Korea	ftp://ftp.ncbi.nlm.nih.gov/geo/samples/GSM2235nnn/GSM2235793/suppl/GSM2235793_5168697004_K_Grn.idat.gz	48708
GSM2235794	Public on Mar 20 2018	Jul 14 2016	Mar 20 2018	RNA	1	Human gastric cancer	Homo sapiens	tissue: gastric cancer	age: 55	Sex: male	ptstage: T1	pnstage: N1	death: 0	duration overall survival: 121	total RNA	RecoverAll鈩?total nucleic acid isolation kit (Ambion) or the mirVana RNA Isolation Labeling Kit (Ambion) were used. Quality control was performed with NanoDrop 2000 (Thermo Fischer Scientific) and RNA Nano 6000 chip (Agilent).	biotin	Illumina TotalPrep鈩?RNA Amplification Kit was used for synthesis of labeled cRNA.	9606	HumanHT-12 v3.0 Expression BeadChip array (Illumina) was used.	Standard Illumina scanning protocol	SAMPLE 100	Genomestudio, quantile normalization	GPL6947	Yong-Min,,Huh	Yonsei University	50 Shinchon-ro	Seoul	120-749	South Korea	ftp://ftp.ncbi.nlm.nih.gov/geo/samples/GSM2235nnn/GSM2235794/suppl/GSM2235794_5168697004_L_Grn.idat.gz	48708
GSM2235795	Public on Mar 20 2018	Jul 14 2016	Mar 20 2018	RNA	1	Human gastric cancer	Homo sapiens	tissue: gastric cancer	age: 73	Sex: female	ptstage: T4	pnstage: N0	death: 0	duration overall survival: 121	total RNA	RecoverAll鈩?total nucleic acid isolation kit (Ambion) or the mirVana RNA Isolation Labeling Kit (Ambion) were used. Quality control was performed with NanoDrop 2000 (Thermo Fischer Scientific) and RNA Nano 6000 chip (Agilent).	biotin	Illumina TotalPrep鈩?RNA Amplification Kit was used for synthesis of labeled cRNA.	9606	HumanHT-12 v3.0 Expression BeadChip array (Illumina) was used.	Standard Illumina scanning protocol	SAMPLE 101	Genomestudio, quantile normalization	GPL6947	Yong-Min,,Huh	Yonsei University	50 Shinchon-ro	Seoul	120-749	South Korea	ftp://ftp.ncbi.nlm.nih.gov/geo/samples/GSM2235nnn/GSM2235795/suppl/GSM2235795_5168697005_A_Grn.idat.gz	48708
GSM2235796	Public on Mar 20 2018	Jul 14 2016	Mar 20 2018	RNA	1	Human gastric cancer	Homo sapiens	tissue: gastric cancer	age: 62	Sex: male	ptstage: T4	pnstage: N3	death: 1	duration overall survival: 44	total RNA	RecoverAll鈩?total nucleic acid isolation kit (Ambion) or the mirVana RNA Isolation Labeling Kit (Ambion) were used. Quality control was performed with NanoDrop 2000 (Thermo Fischer Scientific) and RNA Nano 6000 chip (Agilent).	biotin	Illumina TotalPrep鈩?RNA Amplification Kit was used for synthesis of labeled cRNA.	9606	HumanHT-12 v3.0 Expression BeadChip array (Illumina) was used.	Standard Illumina scanning protocol	SAMPLE 102	Genomestudio, quantile normalization	GPL6947	Yong-Min,,Huh	Yonsei University	50 Shinchon-ro	Seoul	120-749	South Korea	ftp://ftp.ncbi.nlm.nih.gov/geo/samples/GSM2235nnn/GSM2235796/suppl/GSM2235796_5168697005_B_Grn.idat.gz	48708
GSM2235797	Public on Mar 20 2018	Jul 14 2016	Mar 20 2018	RNA	1	Human gastric cancer	Homo sapiens	tissue: gastric cancer	age: 79	Sex: female	ptstage: T3	pnstage: N0	death: 0	duration overall survival: 115	total RNA	RecoverAll鈩?total nucleic acid isolation kit (Ambion) or the mirVana RNA Isolation Labeling Kit (Ambion) were used. Quality control was performed with NanoDrop 2000 (Thermo Fischer Scientific) and RNA Nano 6000 chip (Agilent).	biotin	Illumina TotalPrep鈩?RNA Amplification Kit was used for synthesis of labeled cRNA.	9606	HumanHT-12 v3.0 Expression BeadChip array (Illumina) was used.	Standard Illumina scanning protocol	SAMPLE 103	Genomestudio, quantile normalization	GPL6947	Yong-Min,,Huh	Yonsei University	50 Shinchon-ro	Seoul	120-749	South Korea	ftp://ftp.ncbi.nlm.nih.gov/geo/samples/GSM2235nnn/GSM2235797/suppl/GSM2235797_5168697005_D_Grn.idat.gz	48708
GSM2235798	Public on Mar 20 2018	Jul 14 2016	Mar 20 2018	RNA	1	Human gastric cancer	Homo sapiens	tissue: gastric cancer	age: 76	Sex: male	ptstage: T4	pnstage: N2	death: 1	duration overall survival: 25	total RNA	RecoverAll鈩?total nucleic acid isolation kit (Ambion) or the mirVana RNA Isolation Labeling Kit (Ambion) were used. Quality control was performed with NanoDrop 2000 (Thermo Fischer Scientific) and RNA Nano 6000 chip (Agilent).	biotin	Illumina TotalPrep鈩?RNA Amplification Kit was used for synthesis of labeled cRNA.	9606	HumanHT-12 v3.0 Expression BeadChip array (Illumina) was used.	Standard Illumina scanning protocol	SAMPLE 104	Genomestudio, quantile normalization	GPL6947	Yong-Min,,Huh	Yonsei University	50 Shinchon-ro	Seoul	120-749	South Korea	ftp://ftp.ncbi.nlm.nih.gov/geo/samples/GSM2235nnn/GSM2235798/suppl/GSM2235798_5168697005_E_Grn.idat.gz	48708
GSM2235799	Public on Mar 20 2018	Jul 14 2016	Mar 20 2018	RNA	1	Human gastric cancer	Homo sapiens	tissue: gastric cancer	age: 62	Sex: male	ptstage: T4	pnstage: N3	death: 1	duration overall survival: 12	total RNA	RecoverAll鈩?total nucleic acid isolation kit (Ambion) or the mirVana RNA Isolation Labeling Kit (Ambion) were used. Quality control was performed with NanoDrop 2000 (Thermo Fischer Scientific) and RNA Nano 6000 chip (Agilent).	biotin	Illumina TotalPrep鈩?RNA Amplification Kit was used for synthesis of labeled cRNA.	9606	HumanHT-12 v3.0 Expression BeadChip array (Illumina) was used.	Standard Illumina scanning protocol	SAMPLE 105	Genomestudio, quantile normalization	GPL6947	Yong-Min,,Huh	Yonsei University	50 Shinchon-ro	Seoul	120-749	South Korea	ftp://ftp.ncbi.nlm.nih.gov/geo/samples/GSM2235nnn/GSM2235799/suppl/GSM2235799_5168697005_F_Grn.idat.gz	48708
GSM2235800	Public on Mar 20 2018	Jul 14 2016	Mar 20 2018	RNA	1	Human gastric cancer	Homo sapiens	tissue: gastric cancer	age: 62	Sex: male	ptstage: T3	pnstage: N1	death: 0	duration overall survival: 114	total RNA	RecoverAll鈩?total nucleic acid isolation kit (Ambion) or the mirVana RNA Isolation Labeling Kit (Ambion) were used. Quality control was performed with NanoDrop 2000 (Thermo Fischer Scientific) and RNA Nano 6000 chip (Agilent).	biotin	Illumina TotalPrep鈩?RNA Amplification Kit was used for synthesis of labeled cRNA.	9606	HumanHT-12 v3.0 Expression BeadChip array (Illumina) was used.	Standard Illumina scanning protocol	SAMPLE 106	Genomestudio, quantile normalization	GPL6947	Yong-Min,,Huh	Yonsei University	50 Shinchon-ro	Seoul	120-749	South Korea	ftp://ftp.ncbi.nlm.nih.gov/geo/samples/GSM2235nnn/GSM2235800/suppl/GSM2235800_5168697005_I_Grn.idat.gz	48708
GSM2235801	Public on Mar 20 2018	Jul 14 2016	Mar 20 2018	RNA	1	Human gastric cancer	Homo sapiens	tissue: gastric cancer	age: 50	Sex: male	ptstage: T2	pnstage: N1	death: 0	duration overall survival: 113	total RNA	RecoverAll鈩?total nucleic acid isolation kit (Ambion) or the mirVana RNA Isolation Labeling Kit (Ambion) were used. Quality control was performed with NanoDrop 2000 (Thermo Fischer Scientific) and RNA Nano 6000 chip (Agilent).	biotin	Illumina TotalPrep鈩?RNA Amplification Kit was used for synthesis of labeled cRNA.	9606	HumanHT-12 v3.0 Expression BeadChip array (Illumina) was used.	Standard Illumina scanning protocol	SAMPLE 107	Genomestudio, quantile normalization	GPL6947	Yong-Min,,Huh	Yonsei University	50 Shinchon-ro	Seoul	120-749	South Korea	ftp://ftp.ncbi.nlm.nih.gov/geo/samples/GSM2235nnn/GSM2235801/suppl/GSM2235801_5168697005_J_Grn.idat.gz	48708
GSM2235802	Public on Mar 20 2018	Jul 14 2016	Mar 20 2018	RNA	1	Human gastric cancer	Homo sapiens	tissue: gastric cancer	age: 60	Sex: male	ptstage: T1	pnstage: N0	death: 0	duration overall survival: 106	total RNA	RecoverAll鈩?total nucleic acid isolation kit (Ambion) or the mirVana RNA Isolation Labeling Kit (Ambion) were used. Quality control was performed with NanoDrop 2000 (Thermo Fischer Scientific) and RNA Nano 6000 chip (Agilent).	biotin	Illumina TotalPrep鈩?RNA Amplification Kit was used for synthesis of labeled cRNA.	9606	HumanHT-12 v3.0 Expression BeadChip array (Illumina) was used.	Standard Illumina scanning protocol	SAMPLE 108	Genomestudio, quantile normalization	GPL6947	Yong-Min,,Huh	Yonsei University	50 Shinchon-ro	Seoul	120-749	South Korea	ftp://ftp.ncbi.nlm.nih.gov/geo/samples/GSM2235nnn/GSM2235802/suppl/GSM2235802_5168697026_C_Grn.idat.gz	48708
GSM2235803	Public on Mar 20 2018	Jul 14 2016	Mar 20 2018	RNA	1	Human gastric cancer	Homo sapiens	tissue: gastric cancer	age: 46	Sex: male	ptstage: T3	pnstage: N0	death: 0	duration overall survival: 107	total RNA	RecoverAll鈩?total nucleic acid isolation kit (Ambion) or the mirVana RNA Isolation Labeling Kit (Ambion) were used. Quality control was performed with NanoDrop 2000 (Thermo Fischer Scientific) and RNA Nano 6000 chip (Agilent).	biotin	Illumina TotalPrep鈩?RNA Amplification Kit was used for synthesis of labeled cRNA.	9606	HumanHT-12 v3.0 Expression BeadChip array (Illumina) was used.	Standard Illumina scanning protocol	SAMPLE 109	Genomestudio, quantile normalization	GPL6947	Yong-Min,,Huh	Yonsei University	50 Shinchon-ro	Seoul	120-749	South Korea	ftp://ftp.ncbi.nlm.nih.gov/geo/samples/GSM2235nnn/GSM2235803/suppl/GSM2235803_5168697026_E_Grn.idat.gz	48708
GSM2235804	Public on Mar 20 2018	Jul 14 2016	Mar 20 2018	RNA	1	Human gastric cancer	Homo sapiens	tissue: gastric cancer	age: 64	Sex: male	ptstage: T4	pnstage: N0	death: 0	duration overall survival: 114	total RNA	RecoverAll鈩?total nucleic acid isolation kit (Ambion) or the mirVana RNA Isolation Labeling Kit (Ambion) were used. Quality control was performed with NanoDrop 2000 (Thermo Fischer Scientific) and RNA Nano 6000 chip (Agilent).	biotin	Illumina TotalPrep鈩?RNA Amplification Kit was used for synthesis of labeled cRNA.	9606	HumanHT-12 v3.0 Expression BeadChip array (Illumina) was used.	Standard Illumina scanning protocol	SAMPLE 110	Genomestudio, quantile normalization	GPL6947	Yong-Min,,Huh	Yonsei University	50 Shinchon-ro	Seoul	120-749	South Korea	ftp://ftp.ncbi.nlm.nih.gov/geo/samples/GSM2235nnn/GSM2235804/suppl/GSM2235804_5168697026_H_Grn.idat.gz	48708
GSM2235805	Public on Mar 20 2018	Jul 14 2016	Mar 20 2018	RNA	1	Human gastric cancer	Homo sapiens	tissue: gastric cancer	age: 61	Sex: female	ptstage: T4	pnstage: N1	death: 1	duration overall survival: 5	total RNA	RecoverAll鈩?total nucleic acid isolation kit (Ambion) or the mirVana RNA Isolation Labeling Kit (Ambion) were used. Quality control was performed with NanoDrop 2000 (Thermo Fischer Scientific) and RNA Nano 6000 chip (Agilent).	biotin	Illumina TotalPrep鈩?RNA Amplification Kit was used for synthesis of labeled cRNA.	9606	HumanHT-12 v3.0 Expression BeadChip array (Illumina) was used.	Standard Illumina scanning protocol	SAMPLE 111	Genomestudio, quantile normalization	GPL6947	Yong-Min,,Huh	Yonsei University	50 Shinchon-ro	Seoul	120-749	South Korea	ftp://ftp.ncbi.nlm.nih.gov/geo/samples/GSM2235nnn/GSM2235805/suppl/GSM2235805_5168697026_I_Grn.idat.gz	48708
GSM2235806	Public on Mar 20 2018	Jul 14 2016	Mar 20 2018	RNA	1	Human gastric cancer	Homo sapiens	tissue: gastric cancer	age: 55	Sex: male	ptstage: T4	pnstage: N0	death: 1	duration overall survival: 101	total RNA	RecoverAll鈩?total nucleic acid isolation kit (Ambion) or the mirVana RNA Isolation Labeling Kit (Ambion) were used. Quality control was performed with NanoDrop 2000 (Thermo Fischer Scientific) and RNA Nano 6000 chip (Agilent).	biotin	Illumina TotalPrep鈩?RNA Amplification Kit was used for synthesis of labeled cRNA.	9606	HumanHT-12 v3.0 Expression BeadChip array (Illumina) was used.	Standard Illumina scanning protocol	SAMPLE 112	Genomestudio, quantile normalization	GPL6947	Yong-Min,,Huh	Yonsei University	50 Shinchon-ro	Seoul	120-749	South Korea	ftp://ftp.ncbi.nlm.nih.gov/geo/samples/GSM2235nnn/GSM2235806/suppl/GSM2235806_5168697026_J_Grn.idat.gz	48708
GSM2235807	Public on Mar 20 2018	Jul 14 2016	Mar 20 2018	RNA	1	Human gastric cancer	Homo sapiens	tissue: gastric cancer	age: 70	Sex: male	ptstage: T4	pnstage: N3	death: 1	duration overall survival: 33	total RNA	RecoverAll鈩?total nucleic acid isolation kit (Ambion) or the mirVana RNA Isolation Labeling Kit (Ambion) were used. Quality control was performed with NanoDrop 2000 (Thermo Fischer Scientific) and RNA Nano 6000 chip (Agilent).	biotin	Illumina TotalPrep鈩?RNA Amplification Kit was used for synthesis of labeled cRNA.	9606	HumanHT-12 v3.0 Expression BeadChip array (Illumina) was used.	Standard Illumina scanning protocol	SAMPLE 113	Genomestudio, quantile normalization	GPL6947	Yong-Min,,Huh	Yonsei University	50 Shinchon-ro	Seoul	120-749	South Korea	ftp://ftp.ncbi.nlm.nih.gov/geo/samples/GSM2235nnn/GSM2235807/suppl/GSM2235807_5168697026_K_Grn.idat.gz	48708
GSM2235808	Public on Mar 20 2018	Jul 14 2016	Mar 20 2018	RNA	1	Human gastric cancer	Homo sapiens	tissue: gastric cancer	age: 59	Sex: male	ptstage: T4	pnstage: N1	death: 1	duration overall survival: 23	total RNA	RecoverAll鈩?total nucleic acid isolation kit (Ambion) or the mirVana RNA Isolation Labeling Kit (Ambion) were used. Quality control was performed with NanoDrop 2000 (Thermo Fischer Scientific) and RNA Nano 6000 chip (Agilent).	biotin	Illumina TotalPrep鈩?RNA Amplification Kit was used for synthesis of labeled cRNA.	9606	HumanHT-12 v3.0 Expression BeadChip array (Illumina) was used.	Standard Illumina scanning protocol	SAMPLE 114	Genomestudio, quantile normalization	GPL6947	Yong-Min,,Huh	Yonsei University	50 Shinchon-ro	Seoul	120-749	South Korea	ftp://ftp.ncbi.nlm.nih.gov/geo/samples/GSM2235nnn/GSM2235808/suppl/GSM2235808_5168697026_L_Grn.idat.gz	48708
GSM2235809	Public on Mar 20 2018	Jul 14 2016	Mar 20 2018	RNA	1	Human gastric cancer	Homo sapiens	tissue: gastric cancer	age: 58	Sex: male	ptstage: T4	pnstage: N1	death: 0	duration overall survival: 146	total RNA	RecoverAll鈩?total nucleic acid isolation kit (Ambion) or the mirVana RNA Isolation Labeling Kit (Ambion) were used. Quality control was performed with NanoDrop 2000 (Thermo Fischer Scientific) and RNA Nano 6000 chip (Agilent).	biotin	Illumina TotalPrep鈩?RNA Amplification Kit was used for synthesis of labeled cRNA.	9606	HumanHT-12 v3.0 Expression BeadChip array (Illumina) was used.	Standard Illumina scanning protocol	SAMPLE 115	Genomestudio, quantile normalization	GPL6947	Yong-Min,,Huh	Yonsei University	50 Shinchon-ro	Seoul	120-749	South Korea	ftp://ftp.ncbi.nlm.nih.gov/geo/samples/GSM2235nnn/GSM2235809/suppl/GSM2235809_5356583018_B_Grn.idat.gz	48708
GSM2235810	Public on Mar 20 2018	Jul 14 2016	Mar 20 2018	RNA	1	Human gastric cancer	Homo sapiens	tissue: gastric cancer	age: 54	Sex: male	ptstage: T4	pnstage: N1	death: 1	duration overall survival: 7	total RNA	RecoverAll鈩?total nucleic acid isolation kit (Ambion) or the mirVana RNA Isolation Labeling Kit (Ambion) were used. Quality control was performed with NanoDrop 2000 (Thermo Fischer Scientific) and RNA Nano 6000 chip (Agilent).	biotin	Illumina TotalPrep鈩?RNA Amplification Kit was used for synthesis of labeled cRNA.	9606	HumanHT-12 v3.0 Expression BeadChip array (Illumina) was used.	Standard Illumina scanning protocol	SAMPLE 116	Genomestudio, quantile normalization	GPL6947	Yong-Min,,Huh	Yonsei University	50 Shinchon-ro	Seoul	120-749	South Korea	ftp://ftp.ncbi.nlm.nih.gov/geo/samples/GSM2235nnn/GSM2235810/suppl/GSM2235810_5356583018_D_Grn.idat.gz	48708
GSM2235811	Public on Mar 20 2018	Jul 14 2016	Mar 20 2018	RNA	1	Human gastric cancer	Homo sapiens	tissue: gastric cancer	age: 55	Sex: male	ptstage: T4	pnstage: N2	death: 1	duration overall survival: 12	total RNA	RecoverAll鈩?total nucleic acid isolation kit (Ambion) or the mirVana RNA Isolation Labeling Kit (Ambion) were used. Quality control was performed with NanoDrop 2000 (Thermo Fischer Scientific) and RNA Nano 6000 chip (Agilent).	biotin	Illumina TotalPrep鈩?RNA Amplification Kit was used for synthesis of labeled cRNA.	9606	HumanHT-12 v3.0 Expression BeadChip array (Illumina) was used.	Standard Illumina scanning protocol	SAMPLE 117	Genomestudio, quantile normalization	GPL6947	Yong-Min,,Huh	Yonsei University	50 Shinchon-ro	Seoul	120-749	South Korea	ftp://ftp.ncbi.nlm.nih.gov/geo/samples/GSM2235nnn/GSM2235811/suppl/GSM2235811_5356583018_E_Grn.idat.gz	48708
GSM2235812	Public on Mar 20 2018	Jul 14 2016	Mar 20 2018	RNA	1	Human gastric cancer	Homo sapiens	tissue: gastric cancer	age: 68	Sex: male	ptstage: T4	pnstage: N3	death: 1	duration overall survival: 34	total RNA	RecoverAll鈩?total nucleic acid isolation kit (Ambion) or the mirVana RNA Isolation Labeling Kit (Ambion) were used. Quality control was performed with NanoDrop 2000 (Thermo Fischer Scientific) and RNA Nano 6000 chip (Agilent).	biotin	Illumina TotalPrep鈩?RNA Amplification Kit was used for synthesis of labeled cRNA.	9606	HumanHT-12 v3.0 Expression BeadChip array (Illumina) was used.	Standard Illumina scanning protocol	SAMPLE 118	Genomestudio, quantile normalization	GPL6947	Yong-Min,,Huh	Yonsei University	50 Shinchon-ro	Seoul	120-749	South Korea	ftp://ftp.ncbi.nlm.nih.gov/geo/samples/GSM2235nnn/GSM2235812/suppl/GSM2235812_5356583018_F_Grn.idat.gz	48708
GSM2235813	Public on Mar 20 2018	Jul 14 2016	Mar 20 2018	RNA	1	Human gastric cancer	Homo sapiens	tissue: gastric cancer	age: 64	Sex: male	ptstage: T3	pnstage: N0	death: 1	duration overall survival: 26	total RNA	RecoverAll鈩?total nucleic acid isolation kit (Ambion) or the mirVana RNA Isolation Labeling Kit (Ambion) were used. Quality control was performed with NanoDrop 2000 (Thermo Fischer Scientific) and RNA Nano 6000 chip (Agilent).	biotin	Illumina TotalPrep鈩?RNA Amplification Kit was used for synthesis of labeled cRNA.	9606	HumanHT-12 v3.0 Expression BeadChip array (Illumina) was used.	Standard Illumina scanning protocol	SAMPLE 119	Genomestudio, quantile normalization	GPL6947	Yong-Min,,Huh	Yonsei University	50 Shinchon-ro	Seoul	120-749	South Korea	ftp://ftp.ncbi.nlm.nih.gov/geo/samples/GSM2235nnn/GSM2235813/suppl/GSM2235813_5356583018_H_Grn.idat.gz	48708
GSM2235814	Public on Mar 20 2018	Jul 14 2016	Mar 20 2018	RNA	1	Human gastric cancer	Homo sapiens	tissue: gastric cancer	age: 66	Sex: male	ptstage: T4	pnstage: N3	death: 0	duration overall survival: 113	total RNA	RecoverAll鈩?total nucleic acid isolation kit (Ambion) or the mirVana RNA Isolation Labeling Kit (Ambion) were used. Quality control was performed with NanoDrop 2000 (Thermo Fischer Scientific) and RNA Nano 6000 chip (Agilent).	biotin	Illumina TotalPrep鈩?RNA Amplification Kit was used for synthesis of labeled cRNA.	9606	HumanHT-12 v3.0 Expression BeadChip array (Illumina) was used.	Standard Illumina scanning protocol	SAMPLE 120	Genomestudio, quantile normalization	GPL6947	Yong-Min,,Huh	Yonsei University	50 Shinchon-ro	Seoul	120-749	South Korea	ftp://ftp.ncbi.nlm.nih.gov/geo/samples/GSM2235nnn/GSM2235814/suppl/GSM2235814_5356583018_K_Grn.idat.gz	48708
GSM2235815	Public on Mar 20 2018	Jul 14 2016	Mar 20 2018	RNA	1	Human gastric cancer	Homo sapiens	tissue: gastric cancer	age: 71	Sex: female	ptstage: T4	pnstage: N2	death: 0	duration overall survival: 113	total RNA	RecoverAll鈩?total nucleic acid isolation kit (Ambion) or the mirVana RNA Isolation Labeling Kit (Ambion) were used. Quality control was performed with NanoDrop 2000 (Thermo Fischer Scientific) and RNA Nano 6000 chip (Agilent).	biotin	Illumina TotalPrep鈩?RNA Amplification Kit was used for synthesis of labeled cRNA.	9606	HumanHT-12 v3.0 Expression BeadChip array (Illumina) was used.	Standard Illumina scanning protocol	SAMPLE 121	Genomestudio, quantile normalization	GPL6947	Yong-Min,,Huh	Yonsei University	50 Shinchon-ro	Seoul	120-749	South Korea	ftp://ftp.ncbi.nlm.nih.gov/geo/samples/GSM2235nnn/GSM2235815/suppl/GSM2235815_5356583018_L_Grn.idat.gz	48708
GSM2235816	Public on Mar 20 2018	Jul 14 2016	Mar 20 2018	RNA	1	Human gastric cancer	Homo sapiens	tissue: gastric cancer	age: 48	Sex: male	ptstage: T4	pnstage: N3	death: 1	duration overall survival: 4	total RNA	RecoverAll鈩?total nucleic acid isolation kit (Ambion) or the mirVana RNA Isolation Labeling Kit (Ambion) were used. Quality control was performed with NanoDrop 2000 (Thermo Fischer Scientific) and RNA Nano 6000 chip (Agilent).	biotin	Illumina TotalPrep鈩?RNA Amplification Kit was used for synthesis of labeled cRNA.	9606	HumanHT-12 v3.0 Expression BeadChip array (Illumina) was used.	Standard Illumina scanning protocol	SAMPLE 122	Genomestudio, quantile normalization	GPL6947	Yong-Min,,Huh	Yonsei University	50 Shinchon-ro	Seoul	120-749	South Korea	ftp://ftp.ncbi.nlm.nih.gov/geo/samples/GSM2235nnn/GSM2235816/suppl/GSM2235816_5356583023_A_Grn.idat.gz	48708
GSM2235817	Public on Mar 20 2018	Jul 14 2016	Mar 20 2018	RNA	1	Human gastric cancer	Homo sapiens	tissue: gastric cancer	age: 68	Sex: female	ptstage: T4	pnstage: N1	death: 1	duration overall survival: 55	total RNA	RecoverAll鈩?total nucleic acid isolation kit (Ambion) or the mirVana RNA Isolation Labeling Kit (Ambion) were used. Quality control was performed with NanoDrop 2000 (Thermo Fischer Scientific) and RNA Nano 6000 chip (Agilent).	biotin	Illumina TotalPrep鈩?RNA Amplification Kit was used for synthesis of labeled cRNA.	9606	HumanHT-12 v3.0 Expression BeadChip array (Illumina) was used.	Standard Illumina scanning protocol	SAMPLE 123	Genomestudio, quantile normalization	GPL6947	Yong-Min,,Huh	Yonsei University	50 Shinchon-ro	Seoul	120-749	South Korea	ftp://ftp.ncbi.nlm.nih.gov/geo/samples/GSM2235nnn/GSM2235817/suppl/GSM2235817_5356583023_B_Grn.idat.gz	48708
GSM2235818	Public on Mar 20 2018	Jul 14 2016	Mar 20 2018	RNA	1	Human gastric cancer	Homo sapiens	tissue: gastric cancer	age: 74	Sex: female	ptstage: T4	pnstage: N3	death: 1	duration overall survival: 10	total RNA	RecoverAll鈩?total nucleic acid isolation kit (Ambion) or the mirVana RNA Isolation Labeling Kit (Ambion) were used. Quality control was performed with NanoDrop 2000 (Thermo Fischer Scientific) and RNA Nano 6000 chip (Agilent).	biotin	Illumina TotalPrep鈩?RNA Amplification Kit was used for synthesis of labeled cRNA.	9606	HumanHT-12 v3.0 Expression BeadChip array (Illumina) was used.	Standard Illumina scanning protocol	SAMPLE 124	Genomestudio, quantile normalization	GPL6947	Yong-Min,,Huh	Yonsei University	50 Shinchon-ro	Seoul	120-749	South Korea	ftp://ftp.ncbi.nlm.nih.gov/geo/samples/GSM2235nnn/GSM2235818/suppl/GSM2235818_5356583023_C_Grn.idat.gz	48708
GSM2235819	Public on Mar 20 2018	Jul 14 2016	Mar 20 2018	RNA	1	Human gastric cancer	Homo sapiens	tissue: gastric cancer	age: 68	Sex: male	ptstage: T4	pnstage: N1	death: 1	duration overall survival: 21	total RNA	RecoverAll鈩?total nucleic acid isolation kit (Ambion) or the mirVana RNA Isolation Labeling Kit (Ambion) were used. Quality control was performed with NanoDrop 2000 (Thermo Fischer Scientific) and RNA Nano 6000 chip (Agilent).	biotin	Illumina TotalPrep鈩?RNA Amplification Kit was used for synthesis of labeled cRNA.	9606	HumanHT-12 v3.0 Expression BeadChip array (Illumina) was used.	Standard Illumina scanning protocol	SAMPLE 125	Genomestudio, quantile normalization	GPL6947	Yong-Min,,Huh	Yonsei University	50 Shinchon-ro	Seoul	120-749	South Korea	ftp://ftp.ncbi.nlm.nih.gov/geo/samples/GSM2235nnn/GSM2235819/suppl/GSM2235819_5356583023_D_Grn.idat.gz	48708
GSM2235820	Public on Mar 20 2018	Jul 14 2016	Mar 20 2018	RNA	1	Human gastric cancer	Homo sapiens	tissue: gastric cancer	age: 75	Sex: male	ptstage: T4	pnstage: N1	death: 1	duration overall survival: 24	total RNA	RecoverAll鈩?total nucleic acid isolation kit (Ambion) or the mirVana RNA Isolation Labeling Kit (Ambion) were used. Quality control was performed with NanoDrop 2000 (Thermo Fischer Scientific) and RNA Nano 6000 chip (Agilent).	biotin	Illumina TotalPrep鈩?RNA Amplification Kit was used for synthesis of labeled cRNA.	9606	HumanHT-12 v3.0 Expression BeadChip array (Illumina) was used.	Standard Illumina scanning protocol	SAMPLE 126	Genomestudio, quantile normalization	GPL6947	Yong-Min,,Huh	Yonsei University	50 Shinchon-ro	Seoul	120-749	South Korea	ftp://ftp.ncbi.nlm.nih.gov/geo/samples/GSM2235nnn/GSM2235820/suppl/GSM2235820_5356583023_E_Grn.idat.gz	48708
GSM2235821	Public on Mar 20 2018	Jul 14 2016	Mar 20 2018	RNA	1	Human gastric cancer	Homo sapiens	tissue: gastric cancer	age: 67	Sex: male	ptstage: T4	pnstage: N1	death: 0	duration overall survival: 112	total RNA	RecoverAll鈩?total nucleic acid isolation kit (Ambion) or the mirVana RNA Isolation Labeling Kit (Ambion) were used. Quality control was performed with NanoDrop 2000 (Thermo Fischer Scientific) and RNA Nano 6000 chip (Agilent).	biotin	Illumina TotalPrep鈩?RNA Amplification Kit was used for synthesis of labeled cRNA.	9606	HumanHT-12 v3.0 Expression BeadChip array (Illumina) was used.	Standard Illumina scanning protocol	SAMPLE 127	Genomestudio, quantile normalization	GPL6947	Yong-Min,,Huh	Yonsei University	50 Shinchon-ro	Seoul	120-749	South Korea	ftp://ftp.ncbi.nlm.nih.gov/geo/samples/GSM2235nnn/GSM2235821/suppl/GSM2235821_5356583023_F_Grn.idat.gz	48708
GSM2235822	Public on Mar 20 2018	Jul 14 2016	Mar 20 2018	RNA	1	Human gastric cancer	Homo sapiens	tissue: gastric cancer	age: 55	Sex: male	ptstage: T3	pnstage: N1	death: 0	duration overall survival: 112	total RNA	RecoverAll鈩?total nucleic acid isolation kit (Ambion) or the mirVana RNA Isolation Labeling Kit (Ambion) were used. Quality control was performed with NanoDrop 2000 (Thermo Fischer Scientific) and RNA Nano 6000 chip (Agilent).	biotin	Illumina TotalPrep鈩?RNA Amplification Kit was used for synthesis of labeled cRNA.	9606	HumanHT-12 v3.0 Expression BeadChip array (Illumina) was used.	Standard Illumina scanning protocol	SAMPLE 128	Genomestudio, quantile normalization	GPL6947	Yong-Min,,Huh	Yonsei University	50 Shinchon-ro	Seoul	120-749	South Korea	ftp://ftp.ncbi.nlm.nih.gov/geo/samples/GSM2235nnn/GSM2235822/suppl/GSM2235822_5356583023_G_Grn.idat.gz	48708
GSM2235823	Public on Mar 20 2018	Jul 14 2016	Mar 20 2018	RNA	1	Human gastric cancer	Homo sapiens	tissue: gastric cancer	age: 32	Sex: female	ptstage: T4	pnstage: N1	death: 1	duration overall survival: 9	total RNA	RecoverAll鈩?total nucleic acid isolation kit (Ambion) or the mirVana RNA Isolation Labeling Kit (Ambion) were used. Quality control was performed with NanoDrop 2000 (Thermo Fischer Scientific) and RNA Nano 6000 chip (Agilent).	biotin	Illumina TotalPrep鈩?RNA Amplification Kit was used for synthesis of labeled cRNA.	9606	HumanHT-12 v3.0 Expression BeadChip array (Illumina) was used.	Standard Illumina scanning protocol	SAMPLE 129	Genomestudio, quantile normalization	GPL6947	Yong-Min,,Huh	Yonsei University	50 Shinchon-ro	Seoul	120-749	South Korea	ftp://ftp.ncbi.nlm.nih.gov/geo/samples/GSM2235nnn/GSM2235823/suppl/GSM2235823_5356583023_H_Grn.idat.gz	48708
GSM2235824	Public on Mar 20 2018	Jul 14 2016	Mar 20 2018	RNA	1	Human gastric cancer	Homo sapiens	tissue: gastric cancer	age: 49	Sex: female	ptstage: T4	pnstage: N2	death: 1	duration overall survival: 79	total RNA	RecoverAll鈩?total nucleic acid isolation kit (Ambion) or the mirVana RNA Isolation Labeling Kit (Ambion) were used. Quality control was performed with NanoDrop 2000 (Thermo Fischer Scientific) and RNA Nano 6000 chip (Agilent).	biotin	Illumina TotalPrep鈩?RNA Amplification Kit was used for synthesis of labeled cRNA.	9606	HumanHT-12 v3.0 Expression BeadChip array (Illumina) was used.	Standard Illumina scanning protocol	SAMPLE 130	Genomestudio, quantile normalization	GPL6947	Yong-Min,,Huh	Yonsei University	50 Shinchon-ro	Seoul	120-749	South Korea	ftp://ftp.ncbi.nlm.nih.gov/geo/samples/GSM2235nnn/GSM2235824/suppl/GSM2235824_5356583023_I_Grn.idat.gz	48708
GSM2235825	Public on Mar 20 2018	Jul 14 2016	Mar 20 2018	RNA	1	Human gastric cancer	Homo sapiens	tissue: gastric cancer	age: 69	Sex: male	ptstage: T4	pnstage: N0	death: 1	duration overall survival: 23	total RNA	RecoverAll鈩?total nucleic acid isolation kit (Ambion) or the mirVana RNA Isolation Labeling Kit (Ambion) were used. Quality control was performed with NanoDrop 2000 (Thermo Fischer Scientific) and RNA Nano 6000 chip (Agilent).	biotin	Illumina TotalPrep鈩?RNA Amplification Kit was used for synthesis of labeled cRNA.	9606	HumanHT-12 v3.0 Expression BeadChip array (Illumina) was used.	Standard Illumina scanning protocol	SAMPLE 131	Genomestudio, quantile normalization	GPL6947	Yong-Min,,Huh	Yonsei University	50 Shinchon-ro	Seoul	120-749	South Korea	ftp://ftp.ncbi.nlm.nih.gov/geo/samples/GSM2235nnn/GSM2235825/suppl/GSM2235825_5356583023_J_Grn.idat.gz	48708
GSM2235826	Public on Mar 20 2018	Jul 14 2016	Mar 20 2018	RNA	1	Human gastric cancer	Homo sapiens	tissue: gastric cancer	age: 79	Sex: male	ptstage: T3	pnstage: N2	death: 1	duration overall survival: 11	total RNA	RecoverAll鈩?total nucleic acid isolation kit (Ambion) or the mirVana RNA Isolation Labeling Kit (Ambion) were used. Quality control was performed with NanoDrop 2000 (Thermo Fischer Scientific) and RNA Nano 6000 chip (Agilent).	biotin	Illumina TotalPrep鈩?RNA Amplification Kit was used for synthesis of labeled cRNA.	9606	HumanHT-12 v3.0 Expression BeadChip array (Illumina) was used.	Standard Illumina scanning protocol	SAMPLE 132	Genomestudio, quantile normalization	GPL6947	Yong-Min,,Huh	Yonsei University	50 Shinchon-ro	Seoul	120-749	South Korea	ftp://ftp.ncbi.nlm.nih.gov/geo/samples/GSM2235nnn/GSM2235826/suppl/GSM2235826_5356583023_K_Grn.idat.gz	48708
GSM2235827	Public on Mar 20 2018	Jul 14 2016	Mar 20 2018	RNA	1	Human gastric cancer	Homo sapiens	tissue: gastric cancer	age: 47	Sex: male	ptstage: T4	pnstage: N2	death: 1	duration overall survival: 43	total RNA	RecoverAll鈩?total nucleic acid isolation kit (Ambion) or the mirVana RNA Isolation Labeling Kit (Ambion) were used. Quality control was performed with NanoDrop 2000 (Thermo Fischer Scientific) and RNA Nano 6000 chip (Agilent).	biotin	Illumina TotalPrep鈩?RNA Amplification Kit was used for synthesis of labeled cRNA.	9606	HumanHT-12 v3.0 Expression BeadChip array (Illumina) was used.	Standard Illumina scanning protocol	SAMPLE 133	Genomestudio, quantile normalization	GPL6947	Yong-Min,,Huh	Yonsei University	50 Shinchon-ro	Seoul	120-749	South Korea	ftp://ftp.ncbi.nlm.nih.gov/geo/samples/GSM2235nnn/GSM2235827/suppl/GSM2235827_5356583023_L_Grn.idat.gz	48708
GSM2235828	Public on Mar 20 2018	Jul 14 2016	Mar 20 2018	RNA	1	Human gastric cancer	Homo sapiens	tissue: gastric cancer	age: 55	Sex: male	ptstage: T4	pnstage: N1	death: 0	duration overall survival: 107	total RNA	RecoverAll鈩?total nucleic acid isolation kit (Ambion) or the mirVana RNA Isolation Labeling Kit (Ambion) were used. Quality control was performed with NanoDrop 2000 (Thermo Fischer Scientific) and RNA Nano 6000 chip (Agilent).	biotin	Illumina TotalPrep鈩?RNA Amplification Kit was used for synthesis of labeled cRNA.	9606	HumanHT-12 v3.0 Expression BeadChip array (Illumina) was used.	Standard Illumina scanning protocol	SAMPLE 134	Genomestudio, quantile normalization	GPL6947	Yong-Min,,Huh	Yonsei University	50 Shinchon-ro	Seoul	120-749	South Korea	ftp://ftp.ncbi.nlm.nih.gov/geo/samples/GSM2235nnn/GSM2235828/suppl/GSM2235828_5356583047_A_Grn.idat.gz	48708
GSM2235829	Public on Mar 20 2018	Jul 14 2016	Mar 20 2018	RNA	1	Human gastric cancer	Homo sapiens	tissue: gastric cancer	age: 52	Sex: male	ptstage: T4	pnstage: N0	death: 0	duration overall survival: 109	total RNA	RecoverAll鈩?total nucleic acid isolation kit (Ambion) or the mirVana RNA Isolation Labeling Kit (Ambion) were used. Quality control was performed with NanoDrop 2000 (Thermo Fischer Scientific) and RNA Nano 6000 chip (Agilent).	biotin	Illumina TotalPrep鈩?RNA Amplification Kit was used for synthesis of labeled cRNA.	9606	HumanHT-12 v3.0 Expression BeadChip array (Illumina) was used.	Standard Illumina scanning protocol	SAMPLE 135	Genomestudio, quantile normalization	GPL6947	Yong-Min,,Huh	Yonsei University	50 Shinchon-ro	Seoul	120-749	South Korea	ftp://ftp.ncbi.nlm.nih.gov/geo/samples/GSM2235nnn/GSM2235829/suppl/GSM2235829_5356583047_C_Grn.idat.gz	48708
GSM2235830	Public on Mar 20 2018	Jul 14 2016	Mar 20 2018	RNA	1	Human gastric cancer	Homo sapiens	tissue: gastric cancer	age: 75	Sex: male	ptstage: T4	pnstage: N2	death: 0	duration overall survival: 98	total RNA	RecoverAll鈩?total nucleic acid isolation kit (Ambion) or the mirVana RNA Isolation Labeling Kit (Ambion) were used. Quality control was performed with NanoDrop 2000 (Thermo Fischer Scientific) and RNA Nano 6000 chip (Agilent).	biotin	Illumina TotalPrep鈩?RNA Amplification Kit was used for synthesis of labeled cRNA.	9606	HumanHT-12 v3.0 Expression BeadChip array (Illumina) was used.	Standard Illumina scanning protocol	SAMPLE 136	Genomestudio, quantile normalization	GPL6947	Yong-Min,,Huh	Yonsei University	50 Shinchon-ro	Seoul	120-749	South Korea	ftp://ftp.ncbi.nlm.nih.gov/geo/samples/GSM2235nnn/GSM2235830/suppl/GSM2235830_5356583047_D_Grn.idat.gz	48708
GSM2235831	Public on Mar 20 2018	Jul 14 2016	Mar 20 2018	RNA	1	Human gastric cancer	Homo sapiens	tissue: gastric cancer	age: 81	Sex: male	ptstage: T4	pnstage: N3	death: 1	duration overall survival: 39	total RNA	RecoverAll鈩?total nucleic acid isolation kit (Ambion) or the mirVana RNA Isolation Labeling Kit (Ambion) were used. Quality control was performed with NanoDrop 2000 (Thermo Fischer Scientific) and RNA Nano 6000 chip (Agilent).	biotin	Illumina TotalPrep鈩?RNA Amplification Kit was used for synthesis of labeled cRNA.	9606	HumanHT-12 v3.0 Expression BeadChip array (Illumina) was used.	Standard Illumina scanning protocol	SAMPLE 137	Genomestudio, quantile normalization	GPL6947	Yong-Min,,Huh	Yonsei University	50 Shinchon-ro	Seoul	120-749	South Korea	ftp://ftp.ncbi.nlm.nih.gov/geo/samples/GSM2235nnn/GSM2235831/suppl/GSM2235831_5356583047_E_Grn.idat.gz	48708
GSM2235837	Public on Mar 20 2018	Jul 14 2016	Mar 20 2018	RNA	1	Human gastric cancer	Homo sapiens	tissue: gastric cancer	age: 56	Sex: female	ptstage: T2	pnstage: N0	death: 0	duration overall survival: 113	total RNA	RecoverAll鈩?total nucleic acid isolation kit (Ambion) or the mirVana RNA Isolation Labeling Kit (Ambion) were used. Quality control was performed with NanoDrop 2000 (Thermo Fischer Scientific) and RNA Nano 6000 chip (Agilent).	biotin	Illumina TotalPrep鈩?RNA Amplification Kit was used for synthesis of labeled cRNA.	9606	HumanHT-12 v3.0 Expression BeadChip array (Illumina) was used.	Standard Illumina scanning protocol	SAMPLE 143	Genomestudio, quantile normalization	GPL6947	Yong-Min,,Huh	Yonsei University	50 Shinchon-ro	Seoul	120-749	South Korea	ftp://ftp.ncbi.nlm.nih.gov/geo/samples/GSM2235nnn/GSM2235837/suppl/GSM2235837_5356583052_A_Grn.idat.gz	48708
GSM2235838	Public on Mar 20 2018	Jul 14 2016	Mar 20 2018	RNA	1	Human gastric cancer	Homo sapiens	tissue: gastric cancer	age: 65	Sex: male	ptstage: T4	pnstage: N3	death: 1	duration overall survival: 4	total RNA	RecoverAll鈩?total nucleic acid isolation kit (Ambion) or the mirVana RNA Isolation Labeling Kit (Ambion) were used. Quality control was performed with NanoDrop 2000 (Thermo Fischer Scientific) and RNA Nano 6000 chip (Agilent).	biotin	Illumina TotalPrep鈩?RNA Amplification Kit was used for synthesis of labeled cRNA.	9606	HumanHT-12 v3.0 Expression BeadChip array (Illumina) was used.	Standard Illumina scanning protocol	SAMPLE 144	Genomestudio, quantile normalization	GPL6947	Yong-Min,,Huh	Yonsei University	50 Shinchon-ro	Seoul	120-749	South Korea	ftp://ftp.ncbi.nlm.nih.gov/geo/samples/GSM2235nnn/GSM2235838/suppl/GSM2235838_5356583052_B_Grn.idat.gz	48708
GSM2235839	Public on Mar 20 2018	Jul 14 2016	Mar 20 2018	RNA	1	Human gastric cancer	Homo sapiens	tissue: gastric cancer	age: 63	Sex: male	ptstage: T3	pnstage: N1	death: 1	duration overall survival: 101	total RNA	RecoverAll鈩?total nucleic acid isolation kit (Ambion) or the mirVana RNA Isolation Labeling Kit (Ambion) were used. Quality control was performed with NanoDrop 2000 (Thermo Fischer Scientific) and RNA Nano 6000 chip (Agilent).	biotin	Illumina TotalPrep鈩?RNA Amplification Kit was used for synthesis of labeled cRNA.	9606	HumanHT-12 v3.0 Expression BeadChip array (Illumina) was used.	Standard Illumina scanning protocol	SAMPLE 145	Genomestudio, quantile normalization	GPL6947	Yong-Min,,Huh	Yonsei University	50 Shinchon-ro	Seoul	120-749	South Korea	ftp://ftp.ncbi.nlm.nih.gov/geo/samples/GSM2235nnn/GSM2235839/suppl/GSM2235839_5356583052_C_Grn.idat.gz	48708
GSM2235840	Public on Mar 20 2018	Jul 14 2016	Mar 20 2018	RNA	1	Human gastric cancer	Homo sapiens	tissue: gastric cancer	age: 71	Sex: male	ptstage: T2	pnstage: N0	death: 1	duration overall survival: 92	total RNA	RecoverAll鈩?total nucleic acid isolation kit (Ambion) or the mirVana RNA Isolation Labeling Kit (Ambion) were used. Quality control was performed with NanoDrop 2000 (Thermo Fischer Scientific) and RNA Nano 6000 chip (Agilent).	biotin	Illumina TotalPrep鈩?RNA Amplification Kit was used for synthesis of labeled cRNA.	9606	HumanHT-12 v3.0 Expression BeadChip array (Illumina) was used.	Standard Illumina scanning protocol	SAMPLE 146	Genomestudio, quantile normalization	GPL6947	Yong-Min,,Huh	Yonsei University	50 Shinchon-ro	Seoul	120-749	South Korea	ftp://ftp.ncbi.nlm.nih.gov/geo/samples/GSM2235nnn/GSM2235840/suppl/GSM2235840_5356583052_D_Grn.idat.gz	48708
GSM2235841	Public on Mar 20 2018	Jul 14 2016	Mar 20 2018	RNA	1	Human gastric cancer	Homo sapiens	tissue: gastric cancer	age: 84	Sex: female	ptstage: T4	pnstage: N1	death: 1	duration overall survival: 16	total RNA	RecoverAll鈩?total nucleic acid isolation kit (Ambion) or the mirVana RNA Isolation Labeling Kit (Ambion) were used. Quality control was performed with NanoDrop 2000 (Thermo Fischer Scientific) and RNA Nano 6000 chip (Agilent).	biotin	Illumina TotalPrep鈩?RNA Amplification Kit was used for synthesis of labeled cRNA.	9606	HumanHT-12 v3.0 Expression BeadChip array (Illumina) was used.	Standard Illumina scanning protocol	SAMPLE 147	Genomestudio, quantile normalization	GPL6947	Yong-Min,,Huh	Yonsei University	50 Shinchon-ro	Seoul	120-749	South Korea	ftp://ftp.ncbi.nlm.nih.gov/geo/samples/GSM2235nnn/GSM2235841/suppl/GSM2235841_5356583052_F_Grn.idat.gz	48708
GSM2235842	Public on Mar 20 2018	Jul 14 2016	Mar 20 2018	RNA	1	Human gastric cancer	Homo sapiens	tissue: gastric cancer	age: 72	Sex: male	ptstage: T4	pnstage: N3	death: 1	duration overall survival: 14	total RNA	RecoverAll鈩?total nucleic acid isolation kit (Ambion) or the mirVana RNA Isolation Labeling Kit (Ambion) were used. Quality control was performed with NanoDrop 2000 (Thermo Fischer Scientific) and RNA Nano 6000 chip (Agilent).	biotin	Illumina TotalPrep鈩?RNA Amplification Kit was used for synthesis of labeled cRNA.	9606	HumanHT-12 v3.0 Expression BeadChip array (Illumina) was used.	Standard Illumina scanning protocol	SAMPLE 148	Genomestudio, quantile normalization	GPL6947	Yong-Min,,Huh	Yonsei University	50 Shinchon-ro	Seoul	120-749	South Korea	ftp://ftp.ncbi.nlm.nih.gov/geo/samples/GSM2235nnn/GSM2235842/suppl/GSM2235842_5356583052_G_Grn.idat.gz	48708
GSM2235843	Public on Mar 20 2018	Jul 14 2016	Mar 20 2018	RNA	1	Human gastric cancer	Homo sapiens	tissue: gastric cancer	age: 60	Sex: male	ptstage: T2	pnstage: N1	death: 1	duration overall survival: 13	total RNA	RecoverAll鈩?total nucleic acid isolation kit (Ambion) or the mirVana RNA Isolation Labeling Kit (Ambion) were used. Quality control was performed with NanoDrop 2000 (Thermo Fischer Scientific) and RNA Nano 6000 chip (Agilent).	biotin	Illumina TotalPrep鈩?RNA Amplification Kit was used for synthesis of labeled cRNA.	9606	HumanHT-12 v3.0 Expression BeadChip array (Illumina) was used.	Standard Illumina scanning protocol	SAMPLE 149	Genomestudio, quantile normalization	GPL6947	Yong-Min,,Huh	Yonsei University	50 Shinchon-ro	Seoul	120-749	South Korea	ftp://ftp.ncbi.nlm.nih.gov/geo/samples/GSM2235nnn/GSM2235843/suppl/GSM2235843_5356583052_H_Grn.idat.gz	48708
GSM2235844	Public on Mar 20 2018	Jul 14 2016	Mar 20 2018	RNA	1	Human gastric cancer	Homo sapiens	tissue: gastric cancer	age: 54	Sex: female	ptstage: T4	pnstage: N2	death: 0	duration overall survival: 102	total RNA	RecoverAll鈩?total nucleic acid isolation kit (Ambion) or the mirVana RNA Isolation Labeling Kit (Ambion) were used. Quality control was performed with NanoDrop 2000 (Thermo Fischer Scientific) and RNA Nano 6000 chip (Agilent).	biotin	Illumina TotalPrep鈩?RNA Amplification Kit was used for synthesis of labeled cRNA.	9606	HumanHT-12 v3.0 Expression BeadChip array (Illumina) was used.	Standard Illumina scanning protocol	SAMPLE 150	Genomestudio, quantile normalization	GPL6947	Yong-Min,,Huh	Yonsei University	50 Shinchon-ro	Seoul	120-749	South Korea	ftp://ftp.ncbi.nlm.nih.gov/geo/samples/GSM2235nnn/GSM2235844/suppl/GSM2235844_5356583052_I_Grn.idat.gz	48708
GSM2235845	Public on Mar 20 2018	Jul 14 2016	Mar 20 2018	RNA	1	Human gastric cancer	Homo sapiens	tissue: gastric cancer	age: 51	Sex: male	ptstage: T4	pnstage: N2	death: 1	duration overall survival: 31	total RNA	RecoverAll鈩?total nucleic acid isolation kit (Ambion) or the mirVana RNA Isolation Labeling Kit (Ambion) were used. Quality control was performed with NanoDrop 2000 (Thermo Fischer Scientific) and RNA Nano 6000 chip (Agilent).	biotin	Illumina TotalPrep鈩?RNA Amplification Kit was used for synthesis of labeled cRNA.	9606	HumanHT-12 v3.0 Expression BeadChip array (Illumina) was used.	Standard Illumina scanning protocol	SAMPLE 151	Genomestudio, quantile normalization	GPL6947	Yong-Min,,Huh	Yonsei University	50 Shinchon-ro	Seoul	120-749	South Korea	ftp://ftp.ncbi.nlm.nih.gov/geo/samples/GSM2235nnn/GSM2235845/suppl/GSM2235845_5356583052_J_Grn.idat.gz	48708
GSM2235846	Public on Mar 20 2018	Jul 14 2016	Mar 20 2018	RNA	1	Human gastric cancer	Homo sapiens	tissue: gastric cancer	age: 67	Sex: male	ptstage: T4	pnstage: N2	death: 1	duration overall survival: 92	total RNA	RecoverAll鈩?total nucleic acid isolation kit (Ambion) or the mirVana RNA Isolation Labeling Kit (Ambion) were used. Quality control was performed with NanoDrop 2000 (Thermo Fischer Scientific) and RNA Nano 6000 chip (Agilent).	biotin	Illumina TotalPrep鈩?RNA Amplification Kit was used for synthesis of labeled cRNA.	9606	HumanHT-12 v3.0 Expression BeadChip array (Illumina) was used.	Standard Illumina scanning protocol	SAMPLE 152	Genomestudio, quantile normalization	GPL6947	Yong-Min,,Huh	Yonsei University	50 Shinchon-ro	Seoul	120-749	South Korea	ftp://ftp.ncbi.nlm.nih.gov/geo/samples/GSM2235nnn/GSM2235846/suppl/GSM2235846_5356583052_L_Grn.idat.gz	48708
GSM2235847	Public on Mar 20 2018	Jul 14 2016	Mar 20 2018	RNA	1	Human gastric cancer	Homo sapiens	tissue: gastric cancer	age: 53	Sex: female	ptstage: T4	pnstage: N1	death: 0	duration overall survival: 111	total RNA	RecoverAll鈩?total nucleic acid isolation kit (Ambion) or the mirVana RNA Isolation Labeling Kit (Ambion) were used. Quality control was performed with NanoDrop 2000 (Thermo Fischer Scientific) and RNA Nano 6000 chip (Agilent).	biotin	Illumina TotalPrep鈩?RNA Amplification Kit was used for synthesis of labeled cRNA.	9606	HumanHT-12 v3.0 Expression BeadChip array (Illumina) was used.	Standard Illumina scanning protocol	SAMPLE 153	Genomestudio, quantile normalization	GPL6947	Yong-Min,,Huh	Yonsei University	50 Shinchon-ro	Seoul	120-749	South Korea	ftp://ftp.ncbi.nlm.nih.gov/geo/samples/GSM2235nnn/GSM2235847/suppl/GSM2235847_5356583053_A_Grn.idat.gz	48708
GSM2235848	Public on Mar 20 2018	Jul 14 2016	Mar 20 2018	RNA	1	Human gastric cancer	Homo sapiens	tissue: gastric cancer	age: 52	Sex: male	ptstage: T4	pnstage: N2	death: 1	duration overall survival: 40	total RNA	RecoverAll鈩?total nucleic acid isolation kit (Ambion) or the mirVana RNA Isolation Labeling Kit (Ambion) were used. Quality control was performed with NanoDrop 2000 (Thermo Fischer Scientific) and RNA Nano 6000 chip (Agilent).	biotin	Illumina TotalPrep鈩?RNA Amplification Kit was used for synthesis of labeled cRNA.	9606	HumanHT-12 v3.0 Expression BeadChip array (Illumina) was used.	Standard Illumina scanning protocol	SAMPLE 154	Genomestudio, quantile normalization	GPL6947	Yong-Min,,Huh	Yonsei University	50 Shinchon-ro	Seoul	120-749	South Korea	ftp://ftp.ncbi.nlm.nih.gov/geo/samples/GSM2235nnn/GSM2235848/suppl/GSM2235848_5356583053_B_Grn.idat.gz	48708
GSM2235849	Public on Mar 20 2018	Jul 14 2016	Mar 20 2018	RNA	1	Human gastric cancer	Homo sapiens	tissue: gastric cancer	age: 61	Sex: female	ptstage: T4	pnstage: N2	death: 1	duration overall survival: 1	total RNA	RecoverAll鈩?total nucleic acid isolation kit (Ambion) or the mirVana RNA Isolation Labeling Kit (Ambion) were used. Quality control was performed with NanoDrop 2000 (Thermo Fischer Scientific) and RNA Nano 6000 chip (Agilent).	biotin	Illumina TotalPrep鈩?RNA Amplification Kit was used for synthesis of labeled cRNA.	9606	HumanHT-12 v3.0 Expression BeadChip array (Illumina) was used.	Standard Illumina scanning protocol	SAMPLE 155	Genomestudio, quantile normalization	GPL6947	Yong-Min,,Huh	Yonsei University	50 Shinchon-ro	Seoul	120-749	South Korea	ftp://ftp.ncbi.nlm.nih.gov/geo/samples/GSM2235nnn/GSM2235849/suppl/GSM2235849_5356583053_C_Grn.idat.gz	48708
GSM2235850	Public on Mar 20 2018	Jul 14 2016	Mar 20 2018	RNA	1	Human gastric cancer	Homo sapiens	tissue: gastric cancer	age: 51	Sex: male	ptstage: T2	pnstage: N1	death: 0	duration overall survival: 116	total RNA	RecoverAll鈩?total nucleic acid isolation kit (Ambion) or the mirVana RNA Isolation Labeling Kit (Ambion) were used. Quality control was performed with NanoDrop 2000 (Thermo Fischer Scientific) and RNA Nano 6000 chip (Agilent).	biotin	Illumina TotalPrep鈩?RNA Amplification Kit was used for synthesis of labeled cRNA.	9606	HumanHT-12 v3.0 Expression BeadChip array (Illumina) was used.	Standard Illumina scanning protocol	SAMPLE 156	Genomestudio, quantile normalization	GPL6947	Yong-Min,,Huh	Yonsei University	50 Shinchon-ro	Seoul	120-749	South Korea	ftp://ftp.ncbi.nlm.nih.gov/geo/samples/GSM2235nnn/GSM2235850/suppl/GSM2235850_5356583053_D_Grn.idat.gz	48708
GSM2235851	Public on Mar 20 2018	Jul 14 2016	Mar 20 2018	RNA	1	Human gastric cancer	Homo sapiens	tissue: gastric cancer	age: 81	Sex: male	ptstage: T1	pnstage: N0	death: 1	duration overall survival: 93	total RNA	RecoverAll鈩?total nucleic acid isolation kit (Ambion) or the mirVana RNA Isolation Labeling Kit (Ambion) were used. Quality control was performed with NanoDrop 2000 (Thermo Fischer Scientific) and RNA Nano 6000 chip (Agilent).	biotin	Illumina TotalPrep鈩?RNA Amplification Kit was used for synthesis of labeled cRNA.	9606	HumanHT-12 v3.0 Expression BeadChip array (Illumina) was used.	Standard Illumina scanning protocol	SAMPLE 157	Genomestudio, quantile normalization	GPL6947	Yong-Min,,Huh	Yonsei University	50 Shinchon-ro	Seoul	120-749	South Korea	ftp://ftp.ncbi.nlm.nih.gov/geo/samples/GSM2235nnn/GSM2235851/suppl/GSM2235851_5356583053_E_Grn.idat.gz	48708
GSM2235852	Public on Mar 20 2018	Jul 14 2016	Mar 20 2018	RNA	1	Human gastric cancer	Homo sapiens	tissue: gastric cancer	age: 69	Sex: male	ptstage: T4	pnstage: N3	death: 1	duration overall survival: 48	total RNA	RecoverAll鈩?total nucleic acid isolation kit (Ambion) or the mirVana RNA Isolation Labeling Kit (Ambion) were used. Quality control was performed with NanoDrop 2000 (Thermo Fischer Scientific) and RNA Nano 6000 chip (Agilent).	biotin	Illumina TotalPrep鈩?RNA Amplification Kit was used for synthesis of labeled cRNA.	9606	HumanHT-12 v3.0 Expression BeadChip array (Illumina) was used.	Standard Illumina scanning protocol	SAMPLE 158	Genomestudio, quantile normalization	GPL6947	Yong-Min,,Huh	Yonsei University	50 Shinchon-ro	Seoul	120-749	South Korea	ftp://ftp.ncbi.nlm.nih.gov/geo/samples/GSM2235nnn/GSM2235852/suppl/GSM2235852_5356583053_F_Grn.idat.gz	48708
GSM2235853	Public on Mar 20 2018	Jul 14 2016	Mar 20 2018	RNA	1	Human gastric cancer	Homo sapiens	tissue: gastric cancer	age: 58	Sex: female	ptstage: T2	pnstage: N1	death: 0	duration overall survival: 111	total RNA	RecoverAll鈩?total nucleic acid isolation kit (Ambion) or the mirVana RNA Isolation Labeling Kit (Ambion) were used. Quality control was performed with NanoDrop 2000 (Thermo Fischer Scientific) and RNA Nano 6000 chip (Agilent).	biotin	Illumina TotalPrep鈩?RNA Amplification Kit was used for synthesis of labeled cRNA.	9606	HumanHT-12 v3.0 Expression BeadChip array (Illumina) was used.	Standard Illumina scanning protocol	SAMPLE 159	Genomestudio, quantile normalization	GPL6947	Yong-Min,,Huh	Yonsei University	50 Shinchon-ro	Seoul	120-749	South Korea	ftp://ftp.ncbi.nlm.nih.gov/geo/samples/GSM2235nnn/GSM2235853/suppl/GSM2235853_5356583053_G_Grn.idat.gz	48708
GSM2235854	Public on Mar 20 2018	Jul 14 2016	Mar 20 2018	RNA	1	Human gastric cancer	Homo sapiens	tissue: gastric cancer	age: 66	Sex: female	ptstage: T4	pnstage: N3	death: 0	duration overall survival: 111	total RNA	RecoverAll鈩?total nucleic acid isolation kit (Ambion) or the mirVana RNA Isolation Labeling Kit (Ambion) were used. Quality control was performed with NanoDrop 2000 (Thermo Fischer Scientific) and RNA Nano 6000 chip (Agilent).	biotin	Illumina TotalPrep鈩?RNA Amplification Kit was used for synthesis of labeled cRNA.	9606	HumanHT-12 v3.0 Expression BeadChip array (Illumina) was used.	Standard Illumina scanning protocol	SAMPLE 160	Genomestudio, quantile normalization	GPL6947	Yong-Min,,Huh	Yonsei University	50 Shinchon-ro	Seoul	120-749	South Korea	ftp://ftp.ncbi.nlm.nih.gov/geo/samples/GSM2235nnn/GSM2235854/suppl/GSM2235854_5356583053_H_Grn.idat.gz	48708
GSM2235855	Public on Mar 20 2018	Jul 14 2016	Mar 20 2018	RNA	1	Human gastric cancer	Homo sapiens	tissue: gastric cancer	age: 68	Sex: male	ptstage: T2	pnstage: N1	death: 0	duration overall survival: 110	total RNA	RecoverAll鈩?total nucleic acid isolation kit (Ambion) or the mirVana RNA Isolation Labeling Kit (Ambion) were used. Quality control was performed with NanoDrop 2000 (Thermo Fischer Scientific) and RNA Nano 6000 chip (Agilent).	biotin	Illumina TotalPrep鈩?RNA Amplification Kit was used for synthesis of labeled cRNA.	9606	HumanHT-12 v3.0 Expression BeadChip array (Illumina) was used.	Standard Illumina scanning protocol	SAMPLE 161	Genomestudio, quantile normalization	GPL6947	Yong-Min,,Huh	Yonsei University	50 Shinchon-ro	Seoul	120-749	South Korea	ftp://ftp.ncbi.nlm.nih.gov/geo/samples/GSM2235nnn/GSM2235855/suppl/GSM2235855_5356583053_J_Grn.idat.gz	48708
GSM2235862	Public on Mar 20 2018	Jul 14 2016	Mar 20 2018	RNA	1	Human gastric cancer	Homo sapiens	tissue: gastric cancer	age: 66	Sex: male	ptstage: T4	pnstage: N0	death: 1	duration overall survival: 85	total RNA	RecoverAll鈩?total nucleic acid isolation kit (Ambion) or the mirVana RNA Isolation Labeling Kit (Ambion) were used. Quality control was performed with NanoDrop 2000 (Thermo Fischer Scientific) and RNA Nano 6000 chip (Agilent).	biotin	Illumina TotalPrep鈩?RNA Amplification Kit was used for synthesis of labeled cRNA.	9606	HumanHT-12 v3.0 Expression BeadChip array (Illumina) was used.	Standard Illumina scanning protocol	SAMPLE 168	Genomestudio, quantile normalization	GPL6947	Yong-Min,,Huh	Yonsei University	50 Shinchon-ro	Seoul	120-749	South Korea	ftp://ftp.ncbi.nlm.nih.gov/geo/samples/GSM2235nnn/GSM2235862/suppl/GSM2235862_5370916005_G_Grn.idat.gz	48708
GSM2235863	Public on Mar 20 2018	Jul 14 2016	Mar 20 2018	RNA	1	Human gastric cancer	Homo sapiens	tissue: gastric cancer	age: 67	Sex: male	ptstage: T4	pnstage: N0	death: 0	duration overall survival: 133	total RNA	RecoverAll鈩?total nucleic acid isolation kit (Ambion) or the mirVana RNA Isolation Labeling Kit (Ambion) were used. Quality control was performed with NanoDrop 2000 (Thermo Fischer Scientific) and RNA Nano 6000 chip (Agilent).	biotin	Illumina TotalPrep鈩?RNA Amplification Kit was used for synthesis of labeled cRNA.	9606	HumanHT-12 v3.0 Expression BeadChip array (Illumina) was used.	Standard Illumina scanning protocol	SAMPLE 169	Genomestudio, quantile normalization	GPL6947	Yong-Min,,Huh	Yonsei University	50 Shinchon-ro	Seoul	120-749	South Korea	ftp://ftp.ncbi.nlm.nih.gov/geo/samples/GSM2235nnn/GSM2235863/suppl/GSM2235863_5370916005_H_Grn.idat.gz	48708
GSM2235864	Public on Mar 20 2018	Jul 14 2016	Mar 20 2018	RNA	1	Human gastric cancer	Homo sapiens	tissue: gastric cancer	age: 54	Sex: male	ptstage: T4	pnstage: N1	death: 1	duration overall survival: 12	total RNA	RecoverAll鈩?total nucleic acid isolation kit (Ambion) or the mirVana RNA Isolation Labeling Kit (Ambion) were used. Quality control was performed with NanoDrop 2000 (Thermo Fischer Scientific) and RNA Nano 6000 chip (Agilent).	biotin	Illumina TotalPrep鈩?RNA Amplification Kit was used for synthesis of labeled cRNA.	9606	HumanHT-12 v3.0 Expression BeadChip array (Illumina) was used.	Standard Illumina scanning protocol	SAMPLE 170	Genomestudio, quantile normalization	GPL6947	Yong-Min,,Huh	Yonsei University	50 Shinchon-ro	Seoul	120-749	South Korea	ftp://ftp.ncbi.nlm.nih.gov/geo/samples/GSM2235nnn/GSM2235864/suppl/GSM2235864_5370916005_I_Grn.idat.gz	48708
GSM2235865	Public on Mar 20 2018	Jul 14 2016	Mar 20 2018	RNA	1	Human gastric cancer	Homo sapiens	tissue: gastric cancer	age: 44	Sex: male	ptstage: T4	pnstage: N1	death: 1	duration overall survival: 33	total RNA	RecoverAll鈩?total nucleic acid isolation kit (Ambion) or the mirVana RNA Isolation Labeling Kit (Ambion) were used. Quality control was performed with NanoDrop 2000 (Thermo Fischer Scientific) and RNA Nano 6000 chip (Agilent).	biotin	Illumina TotalPrep鈩?RNA Amplification Kit was used for synthesis of labeled cRNA.	9606	HumanHT-12 v3.0 Expression BeadChip array (Illumina) was used.	Standard Illumina scanning protocol	SAMPLE 171	Genomestudio, quantile normalization	GPL6947	Yong-Min,,Huh	Yonsei University	50 Shinchon-ro	Seoul	120-749	South Korea	ftp://ftp.ncbi.nlm.nih.gov/geo/samples/GSM2235nnn/GSM2235865/suppl/GSM2235865_5370916005_J_Grn.idat.gz	48708
GSM2235866	Public on Mar 20 2018	Jul 14 2016	Mar 20 2018	RNA	1	Human gastric cancer	Homo sapiens	tissue: gastric cancer	age: 79	Sex: female	ptstage: T4	pnstage: N2	death: 0	duration overall survival: 129	total RNA	RecoverAll鈩?total nucleic acid isolation kit (Ambion) or the mirVana RNA Isolation Labeling Kit (Ambion) were used. Quality control was performed with NanoDrop 2000 (Thermo Fischer Scientific) and RNA Nano 6000 chip (Agilent).	biotin	Illumina TotalPrep鈩?RNA Amplification Kit was used for synthesis of labeled cRNA.	9606	HumanHT-12 v3.0 Expression BeadChip array (Illumina) was used.	Standard Illumina scanning protocol	SAMPLE 172	Genomestudio, quantile normalization	GPL6947	Yong-Min,,Huh	Yonsei University	50 Shinchon-ro	Seoul	120-749	South Korea	ftp://ftp.ncbi.nlm.nih.gov/geo/samples/GSM2235nnn/GSM2235866/suppl/GSM2235866_5370916005_K_Grn.idat.gz	48708
GSM2235867	Public on Mar 20 2018	Jul 14 2016	Mar 20 2018	RNA	1	Human gastric cancer	Homo sapiens	tissue: gastric cancer	age: 69	Sex: female	ptstage: T4	pnstage: N2	death: 0	duration overall survival: 125	total RNA	RecoverAll鈩?total nucleic acid isolation kit (Ambion) or the mirVana RNA Isolation Labeling Kit (Ambion) were used. Quality control was performed with NanoDrop 2000 (Thermo Fischer Scientific) and RNA Nano 6000 chip (Agilent).	biotin	Illumina TotalPrep鈩?RNA Amplification Kit was used for synthesis of labeled cRNA.	9606	HumanHT-12 v3.0 Expression BeadChip array (Illumina) was used.	Standard Illumina scanning protocol	SAMPLE 173	Genomestudio, quantile normalization	GPL6947	Yong-Min,,Huh	Yonsei University	50 Shinchon-ro	Seoul	120-749	South Korea	ftp://ftp.ncbi.nlm.nih.gov/geo/samples/GSM2235nnn/GSM2235867/suppl/GSM2235867_5370916005_L_Grn.idat.gz	48708
GSM2235878	Public on Mar 20 2018	Jul 14 2016	Mar 20 2018	RNA	1	Human gastric cancer	Homo sapiens	tissue: gastric cancer	age: 51	Sex: female	ptstage: T4	pnstage: N3	death: 0	duration overall survival: 125	total RNA	RecoverAll鈩?total nucleic acid isolation kit (Ambion) or the mirVana RNA Isolation Labeling Kit (Ambion) were used. Quality control was performed with NanoDrop 2000 (Thermo Fischer Scientific) and RNA Nano 6000 chip (Agilent).	biotin	Illumina TotalPrep鈩?RNA Amplification Kit was used for synthesis of labeled cRNA.	9606	HumanHT-12 v3.0 Expression BeadChip array (Illumina) was used.	Standard Illumina scanning protocol	SAMPLE 184	Genomestudio, quantile normalization	GPL6947	Yong-Min,,Huh	Yonsei University	50 Shinchon-ro	Seoul	120-749	South Korea	ftp://ftp.ncbi.nlm.nih.gov/geo/samples/GSM2235nnn/GSM2235878/suppl/GSM2235878_5370916021_A_Grn.idat.gz	48708
GSM2235879	Public on Mar 20 2018	Jul 14 2016	Mar 20 2018	RNA	1	Human gastric cancer	Homo sapiens	tissue: gastric cancer	age: 68	Sex: female	ptstage: T3	pnstage: N1	death: 1	duration overall survival: 6	total RNA	RecoverAll鈩?total nucleic acid isolation kit (Ambion) or the mirVana RNA Isolation Labeling Kit (Ambion) were used. Quality control was performed with NanoDrop 2000 (Thermo Fischer Scientific) and RNA Nano 6000 chip (Agilent).	biotin	Illumina TotalPrep鈩?RNA Amplification Kit was used for synthesis of labeled cRNA.	9606	HumanHT-12 v3.0 Expression BeadChip array (Illumina) was used.	Standard Illumina scanning protocol	SAMPLE 185	Genomestudio, quantile normalization	GPL6947	Yong-Min,,Huh	Yonsei University	50 Shinchon-ro	Seoul	120-749	South Korea	ftp://ftp.ncbi.nlm.nih.gov/geo/samples/GSM2235nnn/GSM2235879/suppl/GSM2235879_5370916021_B_Grn.idat.gz	48708
GSM2235880	Public on Mar 20 2018	Jul 14 2016	Mar 20 2018	RNA	1	Human gastric cancer	Homo sapiens	tissue: gastric cancer	age: 67	Sex: female	ptstage: T4	pnstage: N2	death: 1	duration overall survival: 17	total RNA	RecoverAll鈩?total nucleic acid isolation kit (Ambion) or the mirVana RNA Isolation Labeling Kit (Ambion) were used. Quality control was performed with NanoDrop 2000 (Thermo Fischer Scientific) and RNA Nano 6000 chip (Agilent).	biotin	Illumina TotalPrep鈩?RNA Amplification Kit was used for synthesis of labeled cRNA.	9606	HumanHT-12 v3.0 Expression BeadChip array (Illumina) was used.	Standard Illumina scanning protocol	SAMPLE 186	Genomestudio, quantile normalization	GPL6947	Yong-Min,,Huh	Yonsei University	50 Shinchon-ro	Seoul	120-749	South Korea	ftp://ftp.ncbi.nlm.nih.gov/geo/samples/GSM2235nnn/GSM2235880/suppl/GSM2235880_5370916021_C_Grn.idat.gz	48708
GSM2235881	Public on Mar 20 2018	Jul 14 2016	Mar 20 2018	RNA	1	Human gastric cancer	Homo sapiens	tissue: gastric cancer	age: 72	Sex: male	ptstage: T4	pnstage: N0	death: 0	duration overall survival: 125	total RNA	RecoverAll鈩?total nucleic acid isolation kit (Ambion) or the mirVana RNA Isolation Labeling Kit (Ambion) were used. Quality control was performed with NanoDrop 2000 (Thermo Fischer Scientific) and RNA Nano 6000 chip (Agilent).	biotin	Illumina TotalPrep鈩?RNA Amplification Kit was used for synthesis of labeled cRNA.	9606	HumanHT-12 v3.0 Expression BeadChip array (Illumina) was used.	Standard Illumina scanning protocol	SAMPLE 187	Genomestudio, quantile normalization	GPL6947	Yong-Min,,Huh	Yonsei University	50 Shinchon-ro	Seoul	120-749	South Korea	ftp://ftp.ncbi.nlm.nih.gov/geo/samples/GSM2235nnn/GSM2235881/suppl/GSM2235881_5370916021_D_Grn.idat.gz	48708
GSM2235882	Public on Mar 20 2018	Jul 14 2016	Mar 20 2018	RNA	1	Human gastric cancer	Homo sapiens	tissue: gastric cancer	age: 55	Sex: male	ptstage: T4	pnstage: N1	death: 1	duration overall survival: 13	total RNA	RecoverAll鈩?total nucleic acid isolation kit (Ambion) or the mirVana RNA Isolation Labeling Kit (Ambion) were used. Quality control was performed with NanoDrop 2000 (Thermo Fischer Scientific) and RNA Nano 6000 chip (Agilent).	biotin	Illumina TotalPrep鈩?RNA Amplification Kit was used for synthesis of labeled cRNA.	9606	HumanHT-12 v3.0 Expression BeadChip array (Illumina) was used.	Standard Illumina scanning protocol	SAMPLE 188	Genomestudio, quantile normalization	GPL6947	Yong-Min,,Huh	Yonsei University	50 Shinchon-ro	Seoul	120-749	South Korea	ftp://ftp.ncbi.nlm.nih.gov/geo/samples/GSM2235nnn/GSM2235882/suppl/GSM2235882_5370916021_E_Grn.idat.gz	48708
GSM2235883	Public on Mar 20 2018	Jul 14 2016	Mar 20 2018	RNA	1	Human gastric cancer	Homo sapiens	tissue: gastric cancer	age: 66	Sex: female	ptstage: T4	pnstage: N2	death: 1	duration overall survival: 19	total RNA	RecoverAll鈩?total nucleic acid isolation kit (Ambion) or the mirVana RNA Isolation Labeling Kit (Ambion) were used. Quality control was performed with NanoDrop 2000 (Thermo Fischer Scientific) and RNA Nano 6000 chip (Agilent).	biotin	Illumina TotalPrep鈩?RNA Amplification Kit was used for synthesis of labeled cRNA.	9606	HumanHT-12 v3.0 Expression BeadChip array (Illumina) was used.	Standard Illumina scanning protocol	SAMPLE 189	Genomestudio, quantile normalization	GPL6947	Yong-Min,,Huh	Yonsei University	50 Shinchon-ro	Seoul	120-749	South Korea	ftp://ftp.ncbi.nlm.nih.gov/geo/samples/GSM2235nnn/GSM2235883/suppl/GSM2235883_5370916021_F_Grn.idat.gz	48708
GSM2235884	Public on Mar 20 2018	Jul 14 2016	Mar 20 2018	RNA	1	Human gastric cancer	Homo sapiens	tissue: gastric cancer	age: 44	Sex: male	ptstage: T4	pnstage: N0	death: 0	duration overall survival: 126	total RNA	RecoverAll鈩?total nucleic acid isolation kit (Ambion) or the mirVana RNA Isolation Labeling Kit (Ambion) were used. Quality control was performed with NanoDrop 2000 (Thermo Fischer Scientific) and RNA Nano 6000 chip (Agilent).	biotin	Illumina TotalPrep鈩?RNA Amplification Kit was used for synthesis of labeled cRNA.	9606	HumanHT-12 v3.0 Expression BeadChip array (Illumina) was used.	Standard Illumina scanning protocol	SAMPLE 190	Genomestudio, quantile normalization	GPL6947	Yong-Min,,Huh	Yonsei University	50 Shinchon-ro	Seoul	120-749	South Korea	ftp://ftp.ncbi.nlm.nih.gov/geo/samples/GSM2235nnn/GSM2235884/suppl/GSM2235884_5370916021_G_Grn.idat.gz	48708
GSM2235885	Public on Mar 20 2018	Jul 14 2016	Mar 20 2018	RNA	1	Human gastric cancer	Homo sapiens	tissue: gastric cancer	age: 73	Sex: female	ptstage: T4	pnstage: N1	death: 0	duration overall survival: 124	total RNA	RecoverAll鈩?total nucleic acid isolation kit (Ambion) or the mirVana RNA Isolation Labeling Kit (Ambion) were used. Quality control was performed with NanoDrop 2000 (Thermo Fischer Scientific) and RNA Nano 6000 chip (Agilent).	biotin	Illumina TotalPrep鈩?RNA Amplification Kit was used for synthesis of labeled cRNA.	9606	HumanHT-12 v3.0 Expression BeadChip array (Illumina) was used.	Standard Illumina scanning protocol	SAMPLE 191	Genomestudio, quantile normalization	GPL6947	Yong-Min,,Huh	Yonsei University	50 Shinchon-ro	Seoul	120-749	South Korea	ftp://ftp.ncbi.nlm.nih.gov/geo/samples/GSM2235nnn/GSM2235885/suppl/GSM2235885_5370916021_H_Grn.idat.gz	48708
GSM2235886	Public on Mar 20 2018	Jul 14 2016	Mar 20 2018	RNA	1	Human gastric cancer	Homo sapiens	tissue: gastric cancer	age: 76	Sex: female	ptstage: T2	pnstage: N1	death: 1	duration overall survival: 51	total RNA	RecoverAll鈩?total nucleic acid isolation kit (Ambion) or the mirVana RNA Isolation Labeling Kit (Ambion) were used. Quality control was performed with NanoDrop 2000 (Thermo Fischer Scientific) and RNA Nano 6000 chip (Agilent).	biotin	Illumina TotalPrep鈩?RNA Amplification Kit was used for synthesis of labeled cRNA.	9606	HumanHT-12 v3.0 Expression BeadChip array (Illumina) was used.	Standard Illumina scanning protocol	SAMPLE 192	Genomestudio, quantile normalization	GPL6947	Yong-Min,,Huh	Yonsei University	50 Shinchon-ro	Seoul	120-749	South Korea	ftp://ftp.ncbi.nlm.nih.gov/geo/samples/GSM2235nnn/GSM2235886/suppl/GSM2235886_5370916021_I_Grn.idat.gz	48708
GSM2235887	Public on Mar 20 2018	Jul 14 2016	Mar 20 2018	RNA	1	Human gastric cancer	Homo sapiens	tissue: gastric cancer	age: 81	Sex: male	ptstage: T3	pnstage: N2	death: 1	duration overall survival: 79	total RNA	RecoverAll鈩?total nucleic acid isolation kit (Ambion) or the mirVana RNA Isolation Labeling Kit (Ambion) were used. Quality control was performed with NanoDrop 2000 (Thermo Fischer Scientific) and RNA Nano 6000 chip (Agilent).	biotin	Illumina TotalPrep鈩?RNA Amplification Kit was used for synthesis of labeled cRNA.	9606	HumanHT-12 v3.0 Expression BeadChip array (Illumina) was used.	Standard Illumina scanning protocol	SAMPLE 193	Genomestudio, quantile normalization	GPL6947	Yong-Min,,Huh	Yonsei University	50 Shinchon-ro	Seoul	120-749	South Korea	ftp://ftp.ncbi.nlm.nih.gov/geo/samples/GSM2235nnn/GSM2235887/suppl/GSM2235887_5370916021_J_Grn.idat.gz	48708
GSM2235888	Public on Mar 20 2018	Jul 14 2016	Mar 20 2018	RNA	1	Human gastric cancer	Homo sapiens	tissue: gastric cancer	age: 36	Sex: female	ptstage: T4	pnstage: N1	death: 1	duration overall survival: 68	total RNA	RecoverAll鈩?total nucleic acid isolation kit (Ambion) or the mirVana RNA Isolation Labeling Kit (Ambion) were used. Quality control was performed with NanoDrop 2000 (Thermo Fischer Scientific) and RNA Nano 6000 chip (Agilent).	biotin	Illumina TotalPrep鈩?RNA Amplification Kit was used for synthesis of labeled cRNA.	9606	HumanHT-12 v3.0 Expression BeadChip array (Illumina) was used.	Standard Illumina scanning protocol	SAMPLE 194	Genomestudio, quantile normalization	GPL6947	Yong-Min,,Huh	Yonsei University	50 Shinchon-ro	Seoul	120-749	South Korea	ftp://ftp.ncbi.nlm.nih.gov/geo/samples/GSM2235nnn/GSM2235888/suppl/GSM2235888_5370916021_K_Grn.idat.gz	48708
GSM2235889	Public on Mar 20 2018	Jul 14 2016	Mar 20 2018	RNA	1	Human gastric cancer	Homo sapiens	tissue: gastric cancer	age: 66	Sex: male	ptstage: T4	pnstage: N1	death: 1	duration overall survival: 93	total RNA	RecoverAll鈩?total nucleic acid isolation kit (Ambion) or the mirVana RNA Isolation Labeling Kit (Ambion) were used. Quality control was performed with NanoDrop 2000 (Thermo Fischer Scientific) and RNA Nano 6000 chip (Agilent).	biotin	Illumina TotalPrep鈩?RNA Amplification Kit was used for synthesis of labeled cRNA.	9606	HumanHT-12 v3.0 Expression BeadChip array (Illumina) was used.	Standard Illumina scanning protocol	SAMPLE 195	Genomestudio, quantile normalization	GPL6947	Yong-Min,,Huh	Yonsei University	50 Shinchon-ro	Seoul	120-749	South Korea	ftp://ftp.ncbi.nlm.nih.gov/geo/samples/GSM2235nnn/GSM2235889/suppl/GSM2235889_5370916021_L_Grn.idat.gz	48708
GSM2235899	Public on Mar 20 2018	Jul 14 2016	Mar 20 2018	RNA	1	Human gastric cancer	Homo sapiens	tissue: gastric cancer	age: 48	Sex: male	ptstage: T4	pnstage: N1	death: 1	duration overall survival: 34	total RNA	RecoverAll鈩?total nucleic acid isolation kit (Ambion) or the mirVana RNA Isolation Labeling Kit (Ambion) were used. Quality control was performed with NanoDrop 2000 (Thermo Fischer Scientific) and RNA Nano 6000 chip (Agilent).	biotin	Illumina TotalPrep鈩?RNA Amplification Kit was used for synthesis of labeled cRNA.	9606	HumanHT-12 v3.0 Expression BeadChip array (Illumina) was used.	Standard Illumina scanning protocol	SAMPLE 205	Genomestudio, quantile normalization	GPL6947	Yong-Min,,Huh	Yonsei University	50 Shinchon-ro	Seoul	120-749	South Korea	ftp://ftp.ncbi.nlm.nih.gov/geo/samples/GSM2235nnn/GSM2235899/suppl/GSM2235899_5370916028_A_Grn.idat.gz	48708
GSM2235900	Public on Mar 20 2018	Jul 14 2016	Mar 20 2018	RNA	1	Human gastric cancer	Homo sapiens	tissue: gastric cancer	age: 46	Sex: male	ptstage: T4	pnstage: N1	death: 0	duration overall survival: 127	total RNA	RecoverAll鈩?total nucleic acid isolation kit (Ambion) or the mirVana RNA Isolation Labeling Kit (Ambion) were used. Quality control was performed with NanoDrop 2000 (Thermo Fischer Scientific) and RNA Nano 6000 chip (Agilent).	biotin	Illumina TotalPrep鈩?RNA Amplification Kit was used for synthesis of labeled cRNA.	9606	HumanHT-12 v3.0 Expression BeadChip array (Illumina) was used.	Standard Illumina scanning protocol	SAMPLE 206	Genomestudio, quantile normalization	GPL6947	Yong-Min,,Huh	Yonsei University	50 Shinchon-ro	Seoul	120-749	South Korea	ftp://ftp.ncbi.nlm.nih.gov/geo/samples/GSM2235nnn/GSM2235900/suppl/GSM2235900_5370916028_B_Grn.idat.gz	48708
GSM2235901	Public on Mar 20 2018	Jul 14 2016	Mar 20 2018	RNA	1	Human gastric cancer	Homo sapiens	tissue: gastric cancer	age: 66	Sex: female	ptstage: T3	pnstage: N1	death: 1	duration overall survival: 58	total RNA	RecoverAll鈩?total nucleic acid isolation kit (Ambion) or the mirVana RNA Isolation Labeling Kit (Ambion) were used. Quality control was performed with NanoDrop 2000 (Thermo Fischer Scientific) and RNA Nano 6000 chip (Agilent).	biotin	Illumina TotalPrep鈩?RNA Amplification Kit was used for synthesis of labeled cRNA.	9606	HumanHT-12 v3.0 Expression BeadChip array (Illumina) was used.	Standard Illumina scanning protocol	SAMPLE 207	Genomestudio, quantile normalization	GPL6947	Yong-Min,,Huh	Yonsei University	50 Shinchon-ro	Seoul	120-749	South Korea	ftp://ftp.ncbi.nlm.nih.gov/geo/samples/GSM2235nnn/GSM2235901/suppl/GSM2235901_5370916028_C_Grn.idat.gz	48708
GSM2235902	Public on Mar 20 2018	Jul 14 2016	Mar 20 2018	RNA	1	Human gastric cancer	Homo sapiens	tissue: gastric cancer	age: 34	Sex: male	ptstage: T4	pnstage: N1	death: 1	duration overall survival: 34	total RNA	RecoverAll鈩?total nucleic acid isolation kit (Ambion) or the mirVana RNA Isolation Labeling Kit (Ambion) were used. Quality control was performed with NanoDrop 2000 (Thermo Fischer Scientific) and RNA Nano 6000 chip (Agilent).	biotin	Illumina TotalPrep鈩?RNA Amplification Kit was used for synthesis of labeled cRNA.	9606	HumanHT-12 v3.0 Expression BeadChip array (Illumina) was used.	Standard Illumina scanning protocol	SAMPLE 208	Genomestudio, quantile normalization	GPL6947	Yong-Min,,Huh	Yonsei University	50 Shinchon-ro	Seoul	120-749	South Korea	ftp://ftp.ncbi.nlm.nih.gov/geo/samples/GSM2235nnn/GSM2235902/suppl/GSM2235902_5370916028_D_Grn.idat.gz	48708
GSM2235903	Public on Mar 20 2018	Jul 14 2016	Mar 20 2018	RNA	1	Human gastric cancer	Homo sapiens	tissue: gastric cancer	age: 50	Sex: male	ptstage: T4	pnstage: N1	death: 0	duration overall survival: 131	total RNA	RecoverAll鈩?total nucleic acid isolation kit (Ambion) or the mirVana RNA Isolation Labeling Kit (Ambion) were used. Quality control was performed with NanoDrop 2000 (Thermo Fischer Scientific) and RNA Nano 6000 chip (Agilent).	biotin	Illumina TotalPrep鈩?RNA Amplification Kit was used for synthesis of labeled cRNA.	9606	HumanHT-12 v3.0 Expression BeadChip array (Illumina) was used.	Standard Illumina scanning protocol	SAMPLE 209	Genomestudio, quantile normalization	GPL6947	Yong-Min,,Huh	Yonsei University	50 Shinchon-ro	Seoul	120-749	South Korea	ftp://ftp.ncbi.nlm.nih.gov/geo/samples/GSM2235nnn/GSM2235903/suppl/GSM2235903_5370916028_E_Grn.idat.gz	48708
GSM2235904	Public on Mar 20 2018	Jul 14 2016	Mar 20 2018	RNA	1	Human gastric cancer	Homo sapiens	tissue: gastric cancer	age: 62	Sex: male	ptstage: T4	pnstage: N1	death: 1	duration overall survival: 21	total RNA	RecoverAll鈩?total nucleic acid isolation kit (Ambion) or the mirVana RNA Isolation Labeling Kit (Ambion) were used. Quality control was performed with NanoDrop 2000 (Thermo Fischer Scientific) and RNA Nano 6000 chip (Agilent).	biotin	Illumina TotalPrep鈩?RNA Amplification Kit was used for synthesis of labeled cRNA.	9606	HumanHT-12 v3.0 Expression BeadChip array (Illumina) was used.	Standard Illumina scanning protocol	SAMPLE 210	Genomestudio, quantile normalization	GPL6947	Yong-Min,,Huh	Yonsei University	50 Shinchon-ro	Seoul	120-749	South Korea	ftp://ftp.ncbi.nlm.nih.gov/geo/samples/GSM2235nnn/GSM2235904/suppl/GSM2235904_5370916028_F_Grn.idat.gz	48708
GSM2235905	Public on Mar 20 2018	Jul 14 2016	Mar 20 2018	RNA	1	Human gastric cancer	Homo sapiens	tissue: gastric cancer	age: 63	Sex: male	ptstage: T4	pnstage: N1	death: 1	duration overall survival: 2	total RNA	RecoverAll鈩?total nucleic acid isolation kit (Ambion) or the mirVana RNA Isolation Labeling Kit (Ambion) were used. Quality control was performed with NanoDrop 2000 (Thermo Fischer Scientific) and RNA Nano 6000 chip (Agilent).	biotin	Illumina TotalPrep鈩?RNA Amplification Kit was used for synthesis of labeled cRNA.	9606	HumanHT-12 v3.0 Expression BeadChip array (Illumina) was used.	Standard Illumina scanning protocol	SAMPLE 211	Genomestudio, quantile normalization	GPL6947	Yong-Min,,Huh	Yonsei University	50 Shinchon-ro	Seoul	120-749	South Korea	ftp://ftp.ncbi.nlm.nih.gov/geo/samples/GSM2235nnn/GSM2235905/suppl/GSM2235905_5370916028_G_Grn.idat.gz	48708
GSM2235906	Public on Mar 20 2018	Jul 14 2016	Mar 20 2018	RNA	1	Human gastric cancer	Homo sapiens	tissue: gastric cancer	age: 70	Sex: female	ptstage: T4	pnstage: N1	death: 1	duration overall survival: 120	total RNA	RecoverAll鈩?total nucleic acid isolation kit (Ambion) or the mirVana RNA Isolation Labeling Kit (Ambion) were used. Quality control was performed with NanoDrop 2000 (Thermo Fischer Scientific) and RNA Nano 6000 chip (Agilent).	biotin	Illumina TotalPrep鈩?RNA Amplification Kit was used for synthesis of labeled cRNA.	9606	HumanHT-12 v3.0 Expression BeadChip array (Illumina) was used.	Standard Illumina scanning protocol	SAMPLE 212	Genomestudio, quantile normalization	GPL6947	Yong-Min,,Huh	Yonsei University	50 Shinchon-ro	Seoul	120-749	South Korea	ftp://ftp.ncbi.nlm.nih.gov/geo/samples/GSM2235nnn/GSM2235906/suppl/GSM2235906_5370916028_H_Grn.idat.gz	48708
GSM2235907	Public on Mar 20 2018	Jul 14 2016	Mar 20 2018	RNA	1	Human gastric cancer	Homo sapiens	tissue: gastric cancer	age: 77	Sex: female	ptstage: T4	pnstage: N0	death: 0	duration overall survival: 123	total RNA	RecoverAll鈩?total nucleic acid isolation kit (Ambion) or the mirVana RNA Isolation Labeling Kit (Ambion) were used. Quality control was performed with NanoDrop 2000 (Thermo Fischer Scientific) and RNA Nano 6000 chip (Agilent).	biotin	Illumina TotalPrep鈩?RNA Amplification Kit was used for synthesis of labeled cRNA.	9606	HumanHT-12 v3.0 Expression BeadChip array (Illumina) was used.	Standard Illumina scanning protocol	SAMPLE 213	Genomestudio, quantile normalization	GPL6947	Yong-Min,,Huh	Yonsei University	50 Shinchon-ro	Seoul	120-749	South Korea	ftp://ftp.ncbi.nlm.nih.gov/geo/samples/GSM2235nnn/GSM2235907/suppl/GSM2235907_5370916028_I_Grn.idat.gz	48708
GSM2235908	Public on Mar 20 2018	Jul 14 2016	Mar 20 2018	RNA	1	Human gastric cancer	Homo sapiens	tissue: gastric cancer	age: 32	Sex: female	ptstage: T3	pnstage: N0	death: 0	duration overall survival: 123	total RNA	RecoverAll鈩?total nucleic acid isolation kit (Ambion) or the mirVana RNA Isolation Labeling Kit (Ambion) were used. Quality control was performed with NanoDrop 2000 (Thermo Fischer Scientific) and RNA Nano 6000 chip (Agilent).	biotin	Illumina TotalPrep鈩?RNA Amplification Kit was used for synthesis of labeled cRNA.	9606	HumanHT-12 v3.0 Expression BeadChip array (Illumina) was used.	Standard Illumina scanning protocol	SAMPLE 214	Genomestudio, quantile normalization	GPL6947	Yong-Min,,Huh	Yonsei University	50 Shinchon-ro	Seoul	120-749	South Korea	ftp://ftp.ncbi.nlm.nih.gov/geo/samples/GSM2235nnn/GSM2235908/suppl/GSM2235908_5370916028_J_Grn.idat.gz	48708
GSM2235909	Public on Mar 20 2018	Jul 14 2016	Mar 20 2018	RNA	1	Human gastric cancer	Homo sapiens	tissue: gastric cancer	age: 63	Sex: male	ptstage: T4	pnstage: N2	death: 1	duration overall survival: 18	total RNA	RecoverAll鈩?total nucleic acid isolation kit (Ambion) or the mirVana RNA Isolation Labeling Kit (Ambion) were used. Quality control was performed with NanoDrop 2000 (Thermo Fischer Scientific) and RNA Nano 6000 chip (Agilent).	biotin	Illumina TotalPrep鈩?RNA Amplification Kit was used for synthesis of labeled cRNA.	9606	HumanHT-12 v3.0 Expression BeadChip array (Illumina) was used.	Standard Illumina scanning protocol	SAMPLE 215	Genomestudio, quantile normalization	GPL6947	Yong-Min,,Huh	Yonsei University	50 Shinchon-ro	Seoul	120-749	South Korea	ftp://ftp.ncbi.nlm.nih.gov/geo/samples/GSM2235nnn/GSM2235909/suppl/GSM2235909_5370916028_K_Grn.idat.gz	48708
GSM2235910	Public on Mar 20 2018	Jul 14 2016	Mar 20 2018	RNA	1	Human gastric cancer	Homo sapiens	tissue: gastric cancer	age: 56	Sex: male	ptstage: T4	pnstage: N1	death: 0	duration overall survival: 139	total RNA	RecoverAll鈩?total nucleic acid isolation kit (Ambion) or the mirVana RNA Isolation Labeling Kit (Ambion) were used. Quality control was performed with NanoDrop 2000 (Thermo Fischer Scientific) and RNA Nano 6000 chip (Agilent).	biotin	Illumina TotalPrep鈩?RNA Amplification Kit was used for synthesis of labeled cRNA.	9606	HumanHT-12 v3.0 Expression BeadChip array (Illumina) was used.	Standard Illumina scanning protocol	SAMPLE 216	Genomestudio, quantile normalization	GPL6947	Yong-Min,,Huh	Yonsei University	50 Shinchon-ro	Seoul	120-749	South Korea	ftp://ftp.ncbi.nlm.nih.gov/geo/samples/GSM2235nnn/GSM2235910/suppl/GSM2235910_5370916028_L_Grn.idat.gz	48708
GSM2235921	Public on Mar 20 2018	Jul 14 2016	Mar 20 2018	RNA	1	Human gastric cancer	Homo sapiens	tissue: gastric cancer	age: 57	Sex: male	ptstage: T2	pnstage: N2	death: 0	duration overall survival: 139	total RNA	RecoverAll鈩?total nucleic acid isolation kit (Ambion) or the mirVana RNA Isolation Labeling Kit (Ambion) were used. Quality control was performed with NanoDrop 2000 (Thermo Fischer Scientific) and RNA Nano 6000 chip (Agilent).	biotin	Illumina TotalPrep鈩?RNA Amplification Kit was used for synthesis of labeled cRNA.	9606	HumanHT-12 v3.0 Expression BeadChip array (Illumina) was used.	Standard Illumina scanning protocol	SAMPLE 227	Genomestudio, quantile normalization	GPL6947	Yong-Min,,Huh	Yonsei University	50 Shinchon-ro	Seoul	120-749	South Korea	ftp://ftp.ncbi.nlm.nih.gov/geo/samples/GSM2235nnn/GSM2235921/suppl/GSM2235921_5370916030_A_Grn.idat.gz	48708
GSM2235922	Public on Mar 20 2018	Jul 14 2016	Mar 20 2018	RNA	1	Human gastric cancer	Homo sapiens	tissue: gastric cancer	age: 68	Sex: male	ptstage: T4	pnstage: N1	death: 0	duration overall survival: 138	total RNA	RecoverAll鈩?total nucleic acid isolation kit (Ambion) or the mirVana RNA Isolation Labeling Kit (Ambion) were used. Quality control was performed with NanoDrop 2000 (Thermo Fischer Scientific) and RNA Nano 6000 chip (Agilent).	biotin	Illumina TotalPrep鈩?RNA Amplification Kit was used for synthesis of labeled cRNA.	9606	HumanHT-12 v3.0 Expression BeadChip array (Illumina) was used.	Standard Illumina scanning protocol	SAMPLE 228	Genomestudio, quantile normalization	GPL6947	Yong-Min,,Huh	Yonsei University	50 Shinchon-ro	Seoul	120-749	South Korea	ftp://ftp.ncbi.nlm.nih.gov/geo/samples/GSM2235nnn/GSM2235922/suppl/GSM2235922_5370916030_B_Grn.idat.gz	48708
GSM2235923	Public on Mar 20 2018	Jul 14 2016	Mar 20 2018	RNA	1	Human gastric cancer	Homo sapiens	tissue: gastric cancer	age: 77	Sex: female	ptstage: T4	pnstage: N1	death: 1	duration overall survival: 14	total RNA	RecoverAll鈩?total nucleic acid isolation kit (Ambion) or the mirVana RNA Isolation Labeling Kit (Ambion) were used. Quality control was performed with NanoDrop 2000 (Thermo Fischer Scientific) and RNA Nano 6000 chip (Agilent).	biotin	Illumina TotalPrep鈩?RNA Amplification Kit was used for synthesis of labeled cRNA.	9606	HumanHT-12 v3.0 Expression BeadChip array (Illumina) was used.	Standard Illumina scanning protocol	SAMPLE 229	Genomestudio, quantile normalization	GPL6947	Yong-Min,,Huh	Yonsei University	50 Shinchon-ro	Seoul	120-749	South Korea	ftp://ftp.ncbi.nlm.nih.gov/geo/samples/GSM2235nnn/GSM2235923/suppl/GSM2235923_5370916030_C_Grn.idat.gz	48708
GSM2235924	Public on Mar 20 2018	Jul 14 2016	Mar 20 2018	RNA	1	Human gastric cancer	Homo sapiens	tissue: gastric cancer	age: 54	Sex: male	ptstage: T4	pnstage: N2	death: 0	duration overall survival: 135	total RNA	RecoverAll鈩?total nucleic acid isolation kit (Ambion) or the mirVana RNA Isolation Labeling Kit (Ambion) were used. Quality control was performed with NanoDrop 2000 (Thermo Fischer Scientific) and RNA Nano 6000 chip (Agilent).	biotin	Illumina TotalPrep鈩?RNA Amplification Kit was used for synthesis of labeled cRNA.	9606	HumanHT-12 v3.0 Expression BeadChip array (Illumina) was used.	Standard Illumina scanning protocol	SAMPLE 230	Genomestudio, quantile normalization	GPL6947	Yong-Min,,Huh	Yonsei University	50 Shinchon-ro	Seoul	120-749	South Korea	ftp://ftp.ncbi.nlm.nih.gov/geo/samples/GSM2235nnn/GSM2235924/suppl/GSM2235924_5370916030_D_Grn.idat.gz	48708
GSM2235925	Public on Mar 20 2018	Jul 14 2016	Mar 20 2018	RNA	1	Human gastric cancer	Homo sapiens	tissue: gastric cancer	age: 64	Sex: male	ptstage: T4	pnstage: N1	death: 0	duration overall survival: 134	total RNA	RecoverAll鈩?total nucleic acid isolation kit (Ambion) or the mirVana RNA Isolation Labeling Kit (Ambion) were used. Quality control was performed with NanoDrop 2000 (Thermo Fischer Scientific) and RNA Nano 6000 chip (Agilent).	biotin	Illumina TotalPrep鈩?RNA Amplification Kit was used for synthesis of labeled cRNA.	9606	HumanHT-12 v3.0 Expression BeadChip array (Illumina) was used.	Standard Illumina scanning protocol	SAMPLE 231	Genomestudio, quantile normalization	GPL6947	Yong-Min,,Huh	Yonsei University	50 Shinchon-ro	Seoul	120-749	South Korea	ftp://ftp.ncbi.nlm.nih.gov/geo/samples/GSM2235nnn/GSM2235925/suppl/GSM2235925_5370916030_E_Grn.idat.gz	48708
GSM2235926	Public on Mar 20 2018	Jul 14 2016	Mar 20 2018	RNA	1	Human gastric cancer	Homo sapiens	tissue: gastric cancer	age: 47	Sex: male	ptstage: T4	pnstage: N2	death: 0	duration overall survival: 140	total RNA	RecoverAll鈩?total nucleic acid isolation kit (Ambion) or the mirVana RNA Isolation Labeling Kit (Ambion) were used. Quality control was performed with NanoDrop 2000 (Thermo Fischer Scientific) and RNA Nano 6000 chip (Agilent).	biotin	Illumina TotalPrep鈩?RNA Amplification Kit was used for synthesis of labeled cRNA.	9606	HumanHT-12 v3.0 Expression BeadChip array (Illumina) was used.	Standard Illumina scanning protocol	SAMPLE 232	Genomestudio, quantile normalization	GPL6947	Yong-Min,,Huh	Yonsei University	50 Shinchon-ro	Seoul	120-749	South Korea	ftp://ftp.ncbi.nlm.nih.gov/geo/samples/GSM2235nnn/GSM2235926/suppl/GSM2235926_5370916030_F_Grn.idat.gz	48708
GSM2235927	Public on Mar 20 2018	Jul 14 2016	Mar 20 2018	RNA	1	Human gastric cancer	Homo sapiens	tissue: gastric cancer	age: 65	Sex: male	ptstage: T4	pnstage: N1	death: 1	duration overall survival: 0	total RNA	RecoverAll鈩?total nucleic acid isolation kit (Ambion) or the mirVana RNA Isolation Labeling Kit (Ambion) were used. Quality control was performed with NanoDrop 2000 (Thermo Fischer Scientific) and RNA Nano 6000 chip (Agilent).	biotin	Illumina TotalPrep鈩?RNA Amplification Kit was used for synthesis of labeled cRNA.	9606	HumanHT-12 v3.0 Expression BeadChip array (Illumina) was used.	Standard Illumina scanning protocol	SAMPLE 233	Genomestudio, quantile normalization	GPL6947	Yong-Min,,Huh	Yonsei University	50 Shinchon-ro	Seoul	120-749	South Korea	ftp://ftp.ncbi.nlm.nih.gov/geo/samples/GSM2235nnn/GSM2235927/suppl/GSM2235927_5370916030_G_Grn.idat.gz	48708
GSM2235928	Public on Mar 20 2018	Jul 14 2016	Mar 20 2018	RNA	1	Human gastric cancer	Homo sapiens	tissue: gastric cancer	age: 56	Sex: female	ptstage: T4	pnstage: N1	death: 0	duration overall survival: 132	total RNA	RecoverAll鈩?total nucleic acid isolation kit (Ambion) or the mirVana RNA Isolation Labeling Kit (Ambion) were used. Quality control was performed with NanoDrop 2000 (Thermo Fischer Scientific) and RNA Nano 6000 chip (Agilent).	biotin	Illumina TotalPrep鈩?RNA Amplification Kit was used for synthesis of labeled cRNA.	9606	HumanHT-12 v3.0 Expression BeadChip array (Illumina) was used.	Standard Illumina scanning protocol	SAMPLE 234	Genomestudio, quantile normalization	GPL6947	Yong-Min,,Huh	Yonsei University	50 Shinchon-ro	Seoul	120-749	South Korea	ftp://ftp.ncbi.nlm.nih.gov/geo/samples/GSM2235nnn/GSM2235928/suppl/GSM2235928_5370916030_H_Grn.idat.gz	48708
GSM2235929	Public on Mar 20 2018	Jul 14 2016	Mar 20 2018	RNA	1	Human gastric cancer	Homo sapiens	tissue: gastric cancer	age: 74	Sex: male	ptstage: T4	pnstage: N2	death: 1	duration overall survival: 60	total RNA	RecoverAll鈩?total nucleic acid isolation kit (Ambion) or the mirVana RNA Isolation Labeling Kit (Ambion) were used. Quality control was performed with NanoDrop 2000 (Thermo Fischer Scientific) and RNA Nano 6000 chip (Agilent).	biotin	Illumina TotalPrep鈩?RNA Amplification Kit was used for synthesis of labeled cRNA.	9606	HumanHT-12 v3.0 Expression BeadChip array (Illumina) was used.	Standard Illumina scanning protocol	SAMPLE 235	Genomestudio, quantile normalization	GPL6947	Yong-Min,,Huh	Yonsei University	50 Shinchon-ro	Seoul	120-749	South Korea	ftp://ftp.ncbi.nlm.nih.gov/geo/samples/GSM2235nnn/GSM2235929/suppl/GSM2235929_5370916030_J_Grn.idat.gz	48708
GSM2235930	Public on Mar 20 2018	Jul 14 2016	Mar 20 2018	RNA	1	Human gastric cancer	Homo sapiens	tissue: gastric cancer	age: 63	Sex: male	ptstage: T4	pnstage: N2	death: 1	duration overall survival: 74	total RNA	RecoverAll鈩?total nucleic acid isolation kit (Ambion) or the mirVana RNA Isolation Labeling Kit (Ambion) were used. Quality control was performed with NanoDrop 2000 (Thermo Fischer Scientific) and RNA Nano 6000 chip (Agilent).	biotin	Illumina TotalPrep鈩?RNA Amplification Kit was used for synthesis of labeled cRNA.	9606	HumanHT-12 v3.0 Expression BeadChip array (Illumina) was used.	Standard Illumina scanning protocol	SAMPLE 236	Genomestudio, quantile normalization	GPL6947	Yong-Min,,Huh	Yonsei University	50 Shinchon-ro	Seoul	120-749	South Korea	ftp://ftp.ncbi.nlm.nih.gov/geo/samples/GSM2235nnn/GSM2235930/suppl/GSM2235930_5370916030_K_Grn.idat.gz	48708
GSM2235931	Public on Mar 20 2018	Jul 14 2016	Mar 20 2018	RNA	1	Human gastric cancer	Homo sapiens	tissue: gastric cancer	age: 34	Sex: male	ptstage: T4	pnstage: N1	death: 0	duration overall survival: 132	total RNA	RecoverAll鈩?total nucleic acid isolation kit (Ambion) or the mirVana RNA Isolation Labeling Kit (Ambion) were used. Quality control was performed with NanoDrop 2000 (Thermo Fischer Scientific) and RNA Nano 6000 chip (Agilent).	biotin	Illumina TotalPrep鈩?RNA Amplification Kit was used for synthesis of labeled cRNA.	9606	HumanHT-12 v3.0 Expression BeadChip array (Illumina) was used.	Standard Illumina scanning protocol	SAMPLE 237	Genomestudio, quantile normalization	GPL6947	Yong-Min,,Huh	Yonsei University	50 Shinchon-ro	Seoul	120-749	South Korea	ftp://ftp.ncbi.nlm.nih.gov/geo/samples/GSM2235nnn/GSM2235931/suppl/GSM2235931_5370916030_L_Grn.idat.gz	48708
GSM2235932	Public on Mar 20 2018	Jul 14 2016	Mar 20 2018	RNA	1	Human gastric cancer	Homo sapiens	tissue: gastric cancer	age: 71	Sex: female	ptstage: T4	pnstage: N2	death: 0	duration overall survival: 59	total RNA	RecoverAll鈩?total nucleic acid isolation kit (Ambion) or the mirVana RNA Isolation Labeling Kit (Ambion) were used. Quality control was performed with NanoDrop 2000 (Thermo Fischer Scientific) and RNA Nano 6000 chip (Agilent).	biotin	Illumina TotalPrep鈩?RNA Amplification Kit was used for synthesis of labeled cRNA.	9606	HumanHT-12 v3.0 Expression BeadChip array (Illumina) was used.	Standard Illumina scanning protocol	SAMPLE 238	Genomestudio, quantile normalization	GPL6947	Yong-Min,,Huh	Yonsei University	50 Shinchon-ro	Seoul	120-749	South Korea	ftp://ftp.ncbi.nlm.nih.gov/geo/samples/GSM2235nnn/GSM2235932/suppl/GSM2235932_5445359003_A_Grn.idat.gz	48708
GSM2235933	Public on Mar 20 2018	Jul 14 2016	Mar 20 2018	RNA	1	Human gastric cancer	Homo sapiens	tissue: gastric cancer	age: 57	Sex: female	ptstage: T4	pnstage: N0	death: 0	duration overall survival: 41	total RNA	RecoverAll鈩?total nucleic acid isolation kit (Ambion) or the mirVana RNA Isolation Labeling Kit (Ambion) were used. Quality control was performed with NanoDrop 2000 (Thermo Fischer Scientific) and RNA Nano 6000 chip (Agilent).	biotin	Illumina TotalPrep鈩?RNA Amplification Kit was used for synthesis of labeled cRNA.	9606	HumanHT-12 v3.0 Expression BeadChip array (Illumina) was used.	Standard Illumina scanning protocol	SAMPLE 239	Genomestudio, quantile normalization	GPL6947	Yong-Min,,Huh	Yonsei University	50 Shinchon-ro	Seoul	120-749	South Korea	ftp://ftp.ncbi.nlm.nih.gov/geo/samples/GSM2235nnn/GSM2235933/suppl/GSM2235933_5445359003_B_Grn.idat.gz	48708
GSM2235934	Public on Mar 20 2018	Jul 14 2016	Mar 20 2018	RNA	1	Human gastric cancer	Homo sapiens	tissue: gastric cancer	age: 63	Sex: male	ptstage: T4	pnstage: N2	death: 0	duration overall survival: 47	total RNA	RecoverAll鈩?total nucleic acid isolation kit (Ambion) or the mirVana RNA Isolation Labeling Kit (Ambion) were used. Quality control was performed with NanoDrop 2000 (Thermo Fischer Scientific) and RNA Nano 6000 chip (Agilent).	biotin	Illumina TotalPrep鈩?RNA Amplification Kit was used for synthesis of labeled cRNA.	9606	HumanHT-12 v3.0 Expression BeadChip array (Illumina) was used.	Standard Illumina scanning protocol	SAMPLE 240	Genomestudio, quantile normalization	GPL6947	Yong-Min,,Huh	Yonsei University	50 Shinchon-ro	Seoul	120-749	South Korea	ftp://ftp.ncbi.nlm.nih.gov/geo/samples/GSM2235nnn/GSM2235934/suppl/GSM2235934_5445359003_C_Grn.idat.gz	48708
GSM2235935	Public on Mar 20 2018	Jul 14 2016	Mar 20 2018	RNA	1	Human gastric cancer	Homo sapiens	tissue: gastric cancer	age: 65	Sex: male	ptstage: T4	pnstage: N2	death: 1	duration overall survival: 19	total RNA	RecoverAll鈩?total nucleic acid isolation kit (Ambion) or the mirVana RNA Isolation Labeling Kit (Ambion) were used. Quality control was performed with NanoDrop 2000 (Thermo Fischer Scientific) and RNA Nano 6000 chip (Agilent).	biotin	Illumina TotalPrep鈩?RNA Amplification Kit was used for synthesis of labeled cRNA.	9606	HumanHT-12 v3.0 Expression BeadChip array (Illumina) was used.	Standard Illumina scanning protocol	SAMPLE 241	Genomestudio, quantile normalization	GPL6947	Yong-Min,,Huh	Yonsei University	50 Shinchon-ro	Seoul	120-749	South Korea	ftp://ftp.ncbi.nlm.nih.gov/geo/samples/GSM2235nnn/GSM2235935/suppl/GSM2235935_5445359003_D_Grn.idat.gz	48708
GSM2235936	Public on Mar 20 2018	Jul 14 2016	Mar 20 2018	RNA	1	Human gastric cancer	Homo sapiens	tissue: gastric cancer	age: 63	Sex: female	ptstage: T1	pnstage: N0	death: 0	duration overall survival: 42	total RNA	RecoverAll鈩?total nucleic acid isolation kit (Ambion) or the mirVana RNA Isolation Labeling Kit (Ambion) were used. Quality control was performed with NanoDrop 2000 (Thermo Fischer Scientific) and RNA Nano 6000 chip (Agilent).	biotin	Illumina TotalPrep鈩?RNA Amplification Kit was used for synthesis of labeled cRNA.	9606	HumanHT-12 v3.0 Expression BeadChip array (Illumina) was used.	Standard Illumina scanning protocol	SAMPLE 242	Genomestudio, quantile normalization	GPL6947	Yong-Min,,Huh	Yonsei University	50 Shinchon-ro	Seoul	120-749	South Korea	ftp://ftp.ncbi.nlm.nih.gov/geo/samples/GSM2235nnn/GSM2235936/suppl/GSM2235936_5445359003_E_Grn.idat.gz	48708
GSM2235937	Public on Mar 20 2018	Jul 14 2016	Mar 20 2018	RNA	1	Human gastric cancer	Homo sapiens	tissue: gastric cancer	age: 54	Sex: female	ptstage: T4	pnstage: N2	death: 0	duration overall survival: 37	total RNA	RecoverAll鈩?total nucleic acid isolation kit (Ambion) or the mirVana RNA Isolation Labeling Kit (Ambion) were used. Quality control was performed with NanoDrop 2000 (Thermo Fischer Scientific) and RNA Nano 6000 chip (Agilent).	biotin	Illumina TotalPrep鈩?RNA Amplification Kit was used for synthesis of labeled cRNA.	9606	HumanHT-12 v3.0 Expression BeadChip array (Illumina) was used.	Standard Illumina scanning protocol	SAMPLE 243	Genomestudio, quantile normalization	GPL6947	Yong-Min,,Huh	Yonsei University	50 Shinchon-ro	Seoul	120-749	South Korea	ftp://ftp.ncbi.nlm.nih.gov/geo/samples/GSM2235nnn/GSM2235937/suppl/GSM2235937_5445359003_F_Grn.idat.gz	48708
GSM2235938	Public on Mar 20 2018	Jul 14 2016	Mar 20 2018	RNA	1	Human gastric cancer	Homo sapiens	tissue: gastric cancer	age: 62	Sex: female	ptstage: T1	pnstage: N0	death: 0	duration overall survival: 92	total RNA	RecoverAll鈩?total nucleic acid isolation kit (Ambion) or the mirVana RNA Isolation Labeling Kit (Ambion) were used. Quality control was performed with NanoDrop 2000 (Thermo Fischer Scientific) and RNA Nano 6000 chip (Agilent).	biotin	Illumina TotalPrep鈩?RNA Amplification Kit was used for synthesis of labeled cRNA.	9606	HumanHT-12 v3.0 Expression BeadChip array (Illumina) was used.	Standard Illumina scanning protocol	SAMPLE 244	Genomestudio, quantile normalization	GPL6947	Yong-Min,,Huh	Yonsei University	50 Shinchon-ro	Seoul	120-749	South Korea	ftp://ftp.ncbi.nlm.nih.gov/geo/samples/GSM2235nnn/GSM2235938/suppl/GSM2235938_5445359003_G_Grn.idat.gz	48708
GSM2235939	Public on Mar 20 2018	Jul 14 2016	Mar 20 2018	RNA	1	Human gastric cancer	Homo sapiens	tissue: gastric cancer	age: 42	Sex: female	ptstage: T2	pnstage: N0	death: 0	duration overall survival: 45	total RNA	RecoverAll鈩?total nucleic acid isolation kit (Ambion) or the mirVana RNA Isolation Labeling Kit (Ambion) were used. Quality control was performed with NanoDrop 2000 (Thermo Fischer Scientific) and RNA Nano 6000 chip (Agilent).	biotin	Illumina TotalPrep鈩?RNA Amplification Kit was used for synthesis of labeled cRNA.	9606	HumanHT-12 v3.0 Expression BeadChip array (Illumina) was used.	Standard Illumina scanning protocol	SAMPLE 245	Genomestudio, quantile normalization	GPL6947	Yong-Min,,Huh	Yonsei University	50 Shinchon-ro	Seoul	120-749	South Korea	ftp://ftp.ncbi.nlm.nih.gov/geo/samples/GSM2235nnn/GSM2235939/suppl/GSM2235939_5445359003_H_Grn.idat.gz	48708
GSM2235940	Public on Mar 20 2018	Jul 14 2016	Mar 20 2018	RNA	1	Human gastric cancer	Homo sapiens	tissue: gastric cancer	age: 63	Sex: male	ptstage: T4	pnstage: N2	death: 1	duration overall survival: 33	total RNA	RecoverAll鈩?total nucleic acid isolation kit (Ambion) or the mirVana RNA Isolation Labeling Kit (Ambion) were used. Quality control was performed with NanoDrop 2000 (Thermo Fischer Scientific) and RNA Nano 6000 chip (Agilent).	biotin	Illumina TotalPrep鈩?RNA Amplification Kit was used for synthesis of labeled cRNA.	9606	HumanHT-12 v3.0 Expression BeadChip array (Illumina) was used.	Standard Illumina scanning protocol	SAMPLE 246	Genomestudio, quantile normalization	GPL6947	Yong-Min,,Huh	Yonsei University	50 Shinchon-ro	Seoul	120-749	South Korea	ftp://ftp.ncbi.nlm.nih.gov/geo/samples/GSM2235nnn/GSM2235940/suppl/GSM2235940_5445359003_I_Grn.idat.gz	48708
GSM2235941	Public on Mar 20 2018	Jul 14 2016	Mar 20 2018	RNA	1	Human gastric cancer	Homo sapiens	tissue: gastric cancer	age: 36	Sex: female	ptstage: T2	pnstage: N1	death: 0	duration overall survival: 41	total RNA	RecoverAll鈩?total nucleic acid isolation kit (Ambion) or the mirVana RNA Isolation Labeling Kit (Ambion) were used. Quality control was performed with NanoDrop 2000 (Thermo Fischer Scientific) and RNA Nano 6000 chip (Agilent).	biotin	Illumina TotalPrep鈩?RNA Amplification Kit was used for synthesis of labeled cRNA.	9606	HumanHT-12 v3.0 Expression BeadChip array (Illumina) was used.	Standard Illumina scanning protocol	SAMPLE 247	Genomestudio, quantile normalization	GPL6947	Yong-Min,,Huh	Yonsei University	50 Shinchon-ro	Seoul	120-749	South Korea	ftp://ftp.ncbi.nlm.nih.gov/geo/samples/GSM2235nnn/GSM2235941/suppl/GSM2235941_5445359003_J_Grn.idat.gz	48708
GSM2235942	Public on Mar 20 2018	Jul 14 2016	Mar 20 2018	RNA	1	Human gastric cancer	Homo sapiens	tissue: gastric cancer	age: 67	Sex: male	ptstage: T1	pnstage: N0	death: 0	duration overall survival: 42	total RNA	RecoverAll鈩?total nucleic acid isolation kit (Ambion) or the mirVana RNA Isolation Labeling Kit (Ambion) were used. Quality control was performed with NanoDrop 2000 (Thermo Fischer Scientific) and RNA Nano 6000 chip (Agilent).	biotin	Illumina TotalPrep鈩?RNA Amplification Kit was used for synthesis of labeled cRNA.	9606	HumanHT-12 v3.0 Expression BeadChip array (Illumina) was used.	Standard Illumina scanning protocol	SAMPLE 248	Genomestudio, quantile normalization	GPL6947	Yong-Min,,Huh	Yonsei University	50 Shinchon-ro	Seoul	120-749	South Korea	ftp://ftp.ncbi.nlm.nih.gov/geo/samples/GSM2235nnn/GSM2235942/suppl/GSM2235942_5445359003_K_Grn.idat.gz	48708
GSM2235943	Public on Mar 20 2018	Jul 14 2016	Mar 20 2018	RNA	1	Human gastric cancer	Homo sapiens	tissue: gastric cancer	age: 65	Sex: male	ptstage: T4	pnstage: N1	death: 0	duration overall survival: 127	total RNA	RecoverAll鈩?total nucleic acid isolation kit (Ambion) or the mirVana RNA Isolation Labeling Kit (Ambion) were used. Quality control was performed with NanoDrop 2000 (Thermo Fischer Scientific) and RNA Nano 6000 chip (Agilent).	biotin	Illumina TotalPrep鈩?RNA Amplification Kit was used for synthesis of labeled cRNA.	9606	HumanHT-12 v3.0 Expression BeadChip array (Illumina) was used.	Standard Illumina scanning protocol	SAMPLE 249	Genomestudio, quantile normalization	GPL6947	Yong-Min,,Huh	Yonsei University	50 Shinchon-ro	Seoul	120-749	South Korea	ftp://ftp.ncbi.nlm.nih.gov/geo/samples/GSM2235nnn/GSM2235943/suppl/GSM2235943_5445359011_A_Grn.idat.gz	48708
GSM2235944	Public on Mar 20 2018	Jul 14 2016	Mar 20 2018	RNA	1	Human gastric cancer	Homo sapiens	tissue: gastric cancer	age: 47	Sex: male	ptstage: T3	pnstage: N0	death: 0	duration overall survival: 126	total RNA	RecoverAll鈩?total nucleic acid isolation kit (Ambion) or the mirVana RNA Isolation Labeling Kit (Ambion) were used. Quality control was performed with NanoDrop 2000 (Thermo Fischer Scientific) and RNA Nano 6000 chip (Agilent).	biotin	Illumina TotalPrep鈩?RNA Amplification Kit was used for synthesis of labeled cRNA.	9606	HumanHT-12 v3.0 Expression BeadChip array (Illumina) was used.	Standard Illumina scanning protocol	SAMPLE 250	Genomestudio, quantile normalization	GPL6947	Yong-Min,,Huh	Yonsei University	50 Shinchon-ro	Seoul	120-749	South Korea	ftp://ftp.ncbi.nlm.nih.gov/geo/samples/GSM2235nnn/GSM2235944/suppl/GSM2235944_5445359011_B_Grn.idat.gz	48708
GSM2235945	Public on Mar 20 2018	Jul 14 2016	Mar 20 2018	RNA	1	Human gastric cancer	Homo sapiens	tissue: gastric cancer	age: 59	Sex: female	ptstage: T4	pnstage: N1	death: 1	duration overall survival: 37	total RNA	RecoverAll鈩?total nucleic acid isolation kit (Ambion) or the mirVana RNA Isolation Labeling Kit (Ambion) were used. Quality control was performed with NanoDrop 2000 (Thermo Fischer Scientific) and RNA Nano 6000 chip (Agilent).	biotin	Illumina TotalPrep鈩?RNA Amplification Kit was used for synthesis of labeled cRNA.	9606	HumanHT-12 v3.0 Expression BeadChip array (Illumina) was used.	Standard Illumina scanning protocol	SAMPLE 251	Genomestudio, quantile normalization	GPL6947	Yong-Min,,Huh	Yonsei University	50 Shinchon-ro	Seoul	120-749	South Korea	ftp://ftp.ncbi.nlm.nih.gov/geo/samples/GSM2235nnn/GSM2235945/suppl/GSM2235945_5445359011_D_Grn.idat.gz	48708
GSM2235946	Public on Mar 20 2018	Jul 14 2016	Mar 20 2018	RNA	1	Human gastric cancer	Homo sapiens	tissue: gastric cancer	age: 55	Sex: male	ptstage: T4	pnstage: N2	death: 0	duration overall survival: 131	total RNA	RecoverAll鈩?total nucleic acid isolation kit (Ambion) or the mirVana RNA Isolation Labeling Kit (Ambion) were used. Quality control was performed with NanoDrop 2000 (Thermo Fischer Scientific) and RNA Nano 6000 chip (Agilent).	biotin	Illumina TotalPrep鈩?RNA Amplification Kit was used for synthesis of labeled cRNA.	9606	HumanHT-12 v3.0 Expression BeadChip array (Illumina) was used.	Standard Illumina scanning protocol	SAMPLE 252	Genomestudio, quantile normalization	GPL6947	Yong-Min,,Huh	Yonsei University	50 Shinchon-ro	Seoul	120-749	South Korea	ftp://ftp.ncbi.nlm.nih.gov/geo/samples/GSM2235nnn/GSM2235946/suppl/GSM2235946_5445359011_E_Grn.idat.gz	48708
GSM2235947	Public on Mar 20 2018	Jul 14 2016	Mar 20 2018	RNA	1	Human gastric cancer	Homo sapiens	tissue: gastric cancer	age: 62	Sex: male	ptstage: T4	pnstage: N1	death: 0	duration overall survival: 129	total RNA	RecoverAll鈩?total nucleic acid isolation kit (Ambion) or the mirVana RNA Isolation Labeling Kit (Ambion) were used. Quality control was performed with NanoDrop 2000 (Thermo Fischer Scientific) and RNA Nano 6000 chip (Agilent).	biotin	Illumina TotalPrep鈩?RNA Amplification Kit was used for synthesis of labeled cRNA.	9606	HumanHT-12 v3.0 Expression BeadChip array (Illumina) was used.	Standard Illumina scanning protocol	SAMPLE 253	Genomestudio, quantile normalization	GPL6947	Yong-Min,,Huh	Yonsei University	50 Shinchon-ro	Seoul	120-749	South Korea	ftp://ftp.ncbi.nlm.nih.gov/geo/samples/GSM2235nnn/GSM2235947/suppl/GSM2235947_5445359011_F_Grn.idat.gz	48708
GSM2235948	Public on Mar 20 2018	Jul 14 2016	Mar 20 2018	RNA	1	Human gastric cancer	Homo sapiens	tissue: gastric cancer	age: 36	Sex: male	ptstage: T4	pnstage: N1	death: 0	duration overall survival: 132	total RNA	RecoverAll鈩?total nucleic acid isolation kit (Ambion) or the mirVana RNA Isolation Labeling Kit (Ambion) were used. Quality control was performed with NanoDrop 2000 (Thermo Fischer Scientific) and RNA Nano 6000 chip (Agilent).	biotin	Illumina TotalPrep鈩?RNA Amplification Kit was used for synthesis of labeled cRNA.	9606	HumanHT-12 v3.0 Expression BeadChip array (Illumina) was used.	Standard Illumina scanning protocol	SAMPLE 254	Genomestudio, quantile normalization	GPL6947	Yong-Min,,Huh	Yonsei University	50 Shinchon-ro	Seoul	120-749	South Korea	ftp://ftp.ncbi.nlm.nih.gov/geo/samples/GSM2235nnn/GSM2235948/suppl/GSM2235948_5445359011_H_Grn.idat.gz	48708
GSM2235949	Public on Mar 20 2018	Jul 14 2016	Mar 20 2018	RNA	1	Human gastric cancer	Homo sapiens	tissue: gastric cancer	age: 43	Sex: male	ptstage: T4	pnstage: N1	death: 0	duration overall survival: 132	total RNA	RecoverAll鈩?total nucleic acid isolation kit (Ambion) or the mirVana RNA Isolation Labeling Kit (Ambion) were used. Quality control was performed with NanoDrop 2000 (Thermo Fischer Scientific) and RNA Nano 6000 chip (Agilent).	biotin	Illumina TotalPrep鈩?RNA Amplification Kit was used for synthesis of labeled cRNA.	9606	HumanHT-12 v3.0 Expression BeadChip array (Illumina) was used.	Standard Illumina scanning protocol	SAMPLE 255	Genomestudio, quantile normalization	GPL6947	Yong-Min,,Huh	Yonsei University	50 Shinchon-ro	Seoul	120-749	South Korea	ftp://ftp.ncbi.nlm.nih.gov/geo/samples/GSM2235nnn/GSM2235949/suppl/GSM2235949_5445359011_I_Grn.idat.gz	48708
GSM2235950	Public on Mar 20 2018	Jul 14 2016	Mar 20 2018	RNA	1	Human gastric cancer	Homo sapiens	tissue: gastric cancer	age: 45	Sex: male	ptstage: T4	pnstage: N1	death: 0	duration overall survival: 128	total RNA	RecoverAll鈩?total nucleic acid isolation kit (Ambion) or the mirVana RNA Isolation Labeling Kit (Ambion) were used. Quality control was performed with NanoDrop 2000 (Thermo Fischer Scientific) and RNA Nano 6000 chip (Agilent).	biotin	Illumina TotalPrep鈩?RNA Amplification Kit was used for synthesis of labeled cRNA.	9606	HumanHT-12 v3.0 Expression BeadChip array (Illumina) was used.	Standard Illumina scanning protocol	SAMPLE 256	Genomestudio, quantile normalization	GPL6947	Yong-Min,,Huh	Yonsei University	50 Shinchon-ro	Seoul	120-749	South Korea	ftp://ftp.ncbi.nlm.nih.gov/geo/samples/GSM2235nnn/GSM2235950/suppl/GSM2235950_5445359011_J_Grn.idat.gz	48708
GSM2235951	Public on Mar 20 2018	Jul 14 2016	Mar 20 2018	RNA	1	Human gastric cancer	Homo sapiens	tissue: gastric cancer	age: 61	Sex: female	ptstage: T4	pnstage: N1	death: 1	duration overall survival: 5	total RNA	RecoverAll鈩?total nucleic acid isolation kit (Ambion) or the mirVana RNA Isolation Labeling Kit (Ambion) were used. Quality control was performed with NanoDrop 2000 (Thermo Fischer Scientific) and RNA Nano 6000 chip (Agilent).	biotin	Illumina TotalPrep鈩?RNA Amplification Kit was used for synthesis of labeled cRNA.	9606	HumanHT-12 v3.0 Expression BeadChip array (Illumina) was used.	Standard Illumina scanning protocol	SAMPLE 257	Genomestudio, quantile normalization	GPL6947	Yong-Min,,Huh	Yonsei University	50 Shinchon-ro	Seoul	120-749	South Korea	ftp://ftp.ncbi.nlm.nih.gov/geo/samples/GSM2235nnn/GSM2235951/suppl/GSM2235951_5445359011_K_Grn.idat.gz	48708
GSM2235952	Public on Mar 20 2018	Jul 14 2016	Mar 20 2018	RNA	1	Human gastric cancer	Homo sapiens	tissue: gastric cancer	age: 56	Sex: female	ptstage: T4	pnstage: N1	death: 1	duration overall survival: 1	total RNA	RecoverAll鈩?total nucleic acid isolation kit (Ambion) or the mirVana RNA Isolation Labeling Kit (Ambion) were used. Quality control was performed with NanoDrop 2000 (Thermo Fischer Scientific) and RNA Nano 6000 chip (Agilent).	biotin	Illumina TotalPrep鈩?RNA Amplification Kit was used for synthesis of labeled cRNA.	9606	HumanHT-12 v3.0 Expression BeadChip array (Illumina) was used.	Standard Illumina scanning protocol	SAMPLE 258	Genomestudio, quantile normalization	GPL6947	Yong-Min,,Huh	Yonsei University	50 Shinchon-ro	Seoul	120-749	South Korea	ftp://ftp.ncbi.nlm.nih.gov/geo/samples/GSM2235nnn/GSM2235952/suppl/GSM2235952_5445359011_L_Grn.idat.gz	48708
GSM2235953	Public on Mar 20 2018	Jul 14 2016	Mar 20 2018	RNA	1	Human gastric cancer	Homo sapiens	tissue: gastric cancer	age: 58	Sex: female	ptstage: T4	pnstage: N1	death: 1	duration overall survival: 10	total RNA	RecoverAll鈩?total nucleic acid isolation kit (Ambion) or the mirVana RNA Isolation Labeling Kit (Ambion) were used. Quality control was performed with NanoDrop 2000 (Thermo Fischer Scientific) and RNA Nano 6000 chip (Agilent).	biotin	Illumina TotalPrep鈩?RNA Amplification Kit was used for synthesis of labeled cRNA.	9606	HumanHT-12 v3.0 Expression BeadChip array (Illumina) was used.	Standard Illumina scanning protocol	SAMPLE 259	Genomestudio, quantile normalization	GPL6947	Yong-Min,,Huh	Yonsei University	50 Shinchon-ro	Seoul	120-749	South Korea	ftp://ftp.ncbi.nlm.nih.gov/geo/samples/GSM2235nnn/GSM2235953/suppl/GSM2235953_5445359022_A_Grn.idat.gz	48708
GSM2235954	Public on Mar 20 2018	Jul 14 2016	Mar 20 2018	RNA	1	Human gastric cancer	Homo sapiens	tissue: gastric cancer	age: 39	Sex: female	ptstage: T3	pnstage: N1	death: 0	duration overall survival: 149	total RNA	RecoverAll鈩?total nucleic acid isolation kit (Ambion) or the mirVana RNA Isolation Labeling Kit (Ambion) were used. Quality control was performed with NanoDrop 2000 (Thermo Fischer Scientific) and RNA Nano 6000 chip (Agilent).	biotin	Illumina TotalPrep鈩?RNA Amplification Kit was used for synthesis of labeled cRNA.	9606	HumanHT-12 v3.0 Expression BeadChip array (Illumina) was used.	Standard Illumina scanning protocol	SAMPLE 260	Genomestudio, quantile normalization	GPL6947	Yong-Min,,Huh	Yonsei University	50 Shinchon-ro	Seoul	120-749	South Korea	ftp://ftp.ncbi.nlm.nih.gov/geo/samples/GSM2235nnn/GSM2235954/suppl/GSM2235954_5445359022_B_Grn.idat.gz	48708
GSM2235955	Public on Mar 20 2018	Jul 14 2016	Mar 20 2018	RNA	1	Human gastric cancer	Homo sapiens	tissue: gastric cancer	age: 48	Sex: male	ptstage: T4	pnstage: N2	death: 0	duration overall survival: 149	total RNA	RecoverAll鈩?total nucleic acid isolation kit (Ambion) or the mirVana RNA Isolation Labeling Kit (Ambion) were used. Quality control was performed with NanoDrop 2000 (Thermo Fischer Scientific) and RNA Nano 6000 chip (Agilent).	biotin	Illumina TotalPrep鈩?RNA Amplification Kit was used for synthesis of labeled cRNA.	9606	HumanHT-12 v3.0 Expression BeadChip array (Illumina) was used.	Standard Illumina scanning protocol	SAMPLE 261	Genomestudio, quantile normalization	GPL6947	Yong-Min,,Huh	Yonsei University	50 Shinchon-ro	Seoul	120-749	South Korea	ftp://ftp.ncbi.nlm.nih.gov/geo/samples/GSM2235nnn/GSM2235955/suppl/GSM2235955_5445359022_C_Grn.idat.gz	48708
GSM2235956	Public on Mar 20 2018	Jul 14 2016	Mar 20 2018	RNA	1	Human gastric cancer	Homo sapiens	tissue: gastric cancer	age: 68	Sex: female	ptstage: T4	pnstage: N2	death: 1	duration overall survival: 135	total RNA	RecoverAll鈩?total nucleic acid isolation kit (Ambion) or the mirVana RNA Isolation Labeling Kit (Ambion) were used. Quality control was performed with NanoDrop 2000 (Thermo Fischer Scientific) and RNA Nano 6000 chip (Agilent).	biotin	Illumina TotalPrep鈩?RNA Amplification Kit was used for synthesis of labeled cRNA.	9606	HumanHT-12 v3.0 Expression BeadChip array (Illumina) was used.	Standard Illumina scanning protocol	SAMPLE 262	Genomestudio, quantile normalization	GPL6947	Yong-Min,,Huh	Yonsei University	50 Shinchon-ro	Seoul	120-749	South Korea	ftp://ftp.ncbi.nlm.nih.gov/geo/samples/GSM2235nnn/GSM2235956/suppl/GSM2235956_5445359022_D_Grn.idat.gz	48708
GSM2235957	Public on Mar 20 2018	Jul 14 2016	Mar 20 2018	RNA	1	Human gastric cancer	Homo sapiens	tissue: gastric cancer	age: 69	Sex: female	ptstage: T3	pnstage: N2	death: 0	duration overall survival: 148	total RNA	RecoverAll鈩?total nucleic acid isolation kit (Ambion) or the mirVana RNA Isolation Labeling Kit (Ambion) were used. Quality control was performed with NanoDrop 2000 (Thermo Fischer Scientific) and RNA Nano 6000 chip (Agilent).	biotin	Illumina TotalPrep鈩?RNA Amplification Kit was used for synthesis of labeled cRNA.	9606	HumanHT-12 v3.0 Expression BeadChip array (Illumina) was used.	Standard Illumina scanning protocol	SAMPLE 263	Genomestudio, quantile normalization	GPL6947	Yong-Min,,Huh	Yonsei University	50 Shinchon-ro	Seoul	120-749	South Korea	ftp://ftp.ncbi.nlm.nih.gov/geo/samples/GSM2235nnn/GSM2235957/suppl/GSM2235957_5445359022_E_Grn.idat.gz	48708
GSM2235958	Public on Mar 20 2018	Jul 14 2016	Mar 20 2018	RNA	1	Human gastric cancer	Homo sapiens	tissue: gastric cancer	age: 55	Sex: male	ptstage: T4	pnstage: N2	death: 0	duration overall survival: 152	total RNA	RecoverAll鈩?total nucleic acid isolation kit (Ambion) or the mirVana RNA Isolation Labeling Kit (Ambion) were used. Quality control was performed with NanoDrop 2000 (Thermo Fischer Scientific) and RNA Nano 6000 chip (Agilent).	biotin	Illumina TotalPrep鈩?RNA Amplification Kit was used for synthesis of labeled cRNA.	9606	HumanHT-12 v3.0 Expression BeadChip array (Illumina) was used.	Standard Illumina scanning protocol	SAMPLE 264	Genomestudio, quantile normalization	GPL6947	Yong-Min,,Huh	Yonsei University	50 Shinchon-ro	Seoul	120-749	South Korea	ftp://ftp.ncbi.nlm.nih.gov/geo/samples/GSM2235nnn/GSM2235958/suppl/GSM2235958_5445359022_F_Grn.idat.gz	48708
GSM2235959	Public on Mar 20 2018	Jul 14 2016	Mar 20 2018	RNA	1	Human gastric cancer	Homo sapiens	tissue: gastric cancer	age: 61	Sex: male	ptstage: T3	pnstage: N2	death: 0	duration overall survival: 144	total RNA	RecoverAll鈩?total nucleic acid isolation kit (Ambion) or the mirVana RNA Isolation Labeling Kit (Ambion) were used. Quality control was performed with NanoDrop 2000 (Thermo Fischer Scientific) and RNA Nano 6000 chip (Agilent).	biotin	Illumina TotalPrep鈩?RNA Amplification Kit was used for synthesis of labeled cRNA.	9606	HumanHT-12 v3.0 Expression BeadChip array (Illumina) was used.	Standard Illumina scanning protocol	SAMPLE 265	Genomestudio, quantile normalization	GPL6947	Yong-Min,,Huh	Yonsei University	50 Shinchon-ro	Seoul	120-749	South Korea	ftp://ftp.ncbi.nlm.nih.gov/geo/samples/GSM2235nnn/GSM2235959/suppl/GSM2235959_5445359022_G_Grn.idat.gz	48708
GSM2235960	Public on Mar 20 2018	Jul 14 2016	Mar 20 2018	RNA	1	Human gastric cancer	Homo sapiens	tissue: gastric cancer	age: 66	Sex: male	ptstage: T4	pnstage: N1	death: 0	duration overall survival: 142	total RNA	RecoverAll鈩?total nucleic acid isolation kit (Ambion) or the mirVana RNA Isolation Labeling Kit (Ambion) were used. Quality control was performed with NanoDrop 2000 (Thermo Fischer Scientific) and RNA Nano 6000 chip (Agilent).	biotin	Illumina TotalPrep鈩?RNA Amplification Kit was used for synthesis of labeled cRNA.	9606	HumanHT-12 v3.0 Expression BeadChip array (Illumina) was used.	Standard Illumina scanning protocol	SAMPLE 266	Genomestudio, quantile normalization	GPL6947	Yong-Min,,Huh	Yonsei University	50 Shinchon-ro	Seoul	120-749	South Korea	ftp://ftp.ncbi.nlm.nih.gov/geo/samples/GSM2235nnn/GSM2235960/suppl/GSM2235960_5445359022_H_Grn.idat.gz	48708
GSM2235961	Public on Mar 20 2018	Jul 14 2016	Mar 20 2018	RNA	1	Human gastric cancer	Homo sapiens	tissue: gastric cancer	age: 55	Sex: male	ptstage: T4	pnstage: N1	death: 0	duration overall survival: 141	total RNA	RecoverAll鈩?total nucleic acid isolation kit (Ambion) or the mirVana RNA Isolation Labeling Kit (Ambion) were used. Quality control was performed with NanoDrop 2000 (Thermo Fischer Scientific) and RNA Nano 6000 chip (Agilent).	biotin	Illumina TotalPrep鈩?RNA Amplification Kit was used for synthesis of labeled cRNA.	9606	HumanHT-12 v3.0 Expression BeadChip array (Illumina) was used.	Standard Illumina scanning protocol	SAMPLE 267	Genomestudio, quantile normalization	GPL6947	Yong-Min,,Huh	Yonsei University	50 Shinchon-ro	Seoul	120-749	South Korea	ftp://ftp.ncbi.nlm.nih.gov/geo/samples/GSM2235nnn/GSM2235961/suppl/GSM2235961_5445359022_I_Grn.idat.gz	48708
GSM2235962	Public on Mar 20 2018	Jul 14 2016	Mar 20 2018	RNA	1	Human gastric cancer	Homo sapiens	tissue: gastric cancer	age: 64	Sex: male	ptstage: T4	pnstage: N1	death: 1	duration overall survival: 27	total RNA	RecoverAll鈩?total nucleic acid isolation kit (Ambion) or the mirVana RNA Isolation Labeling Kit (Ambion) were used. Quality control was performed with NanoDrop 2000 (Thermo Fischer Scientific) and RNA Nano 6000 chip (Agilent).	biotin	Illumina TotalPrep鈩?RNA Amplification Kit was used for synthesis of labeled cRNA.	9606	HumanHT-12 v3.0 Expression BeadChip array (Illumina) was used.	Standard Illumina scanning protocol	SAMPLE 268	Genomestudio, quantile normalization	GPL6947	Yong-Min,,Huh	Yonsei University	50 Shinchon-ro	Seoul	120-749	South Korea	ftp://ftp.ncbi.nlm.nih.gov/geo/samples/GSM2235nnn/GSM2235962/suppl/GSM2235962_5445359022_J_Grn.idat.gz	48708
GSM2235963	Public on Mar 20 2018	Jul 14 2016	Mar 20 2018	RNA	1	Human gastric cancer	Homo sapiens	tissue: gastric cancer	age: 58	Sex: female	ptstage: T4	pnstage: N2	death: 1	duration overall survival: 27	total RNA	RecoverAll鈩?total nucleic acid isolation kit (Ambion) or the mirVana RNA Isolation Labeling Kit (Ambion) were used. Quality control was performed with NanoDrop 2000 (Thermo Fischer Scientific) and RNA Nano 6000 chip (Agilent).	biotin	Illumina TotalPrep鈩?RNA Amplification Kit was used for synthesis of labeled cRNA.	9606	HumanHT-12 v3.0 Expression BeadChip array (Illumina) was used.	Standard Illumina scanning protocol	SAMPLE 269	Genomestudio, quantile normalization	GPL6947	Yong-Min,,Huh	Yonsei University	50 Shinchon-ro	Seoul	120-749	South Korea	ftp://ftp.ncbi.nlm.nih.gov/geo/samples/GSM2235nnn/GSM2235963/suppl/GSM2235963_5445359022_K_Grn.idat.gz	48708
GSM2235964	Public on Mar 20 2018	Jul 14 2016	Mar 20 2018	RNA	1	Human gastric cancer	Homo sapiens	tissue: gastric cancer	age: 64	Sex: male	ptstage: T4	pnstage: N2	death: 1	duration overall survival: 22	total RNA	RecoverAll鈩?total nucleic acid isolation kit (Ambion) or the mirVana RNA Isolation Labeling Kit (Ambion) were used. Quality control was performed with NanoDrop 2000 (Thermo Fischer Scientific) and RNA Nano 6000 chip (Agilent).	biotin	Illumina TotalPrep鈩?RNA Amplification Kit was used for synthesis of labeled cRNA.	9606	HumanHT-12 v3.0 Expression BeadChip array (Illumina) was used.	Standard Illumina scanning protocol	SAMPLE 270	Genomestudio, quantile normalization	GPL6947	Yong-Min,,Huh	Yonsei University	50 Shinchon-ro	Seoul	120-749	South Korea	ftp://ftp.ncbi.nlm.nih.gov/geo/samples/GSM2235nnn/GSM2235964/suppl/GSM2235964_5445359022_L_Grn.idat.gz	48708
GSM2235965	Public on Mar 20 2018	Jul 14 2016	Mar 20 2018	RNA	1	Human gastric cancer	Homo sapiens	tissue: gastric cancer	age: 58	Sex: male	ptstage: T3	pnstage: N1	death: 1	duration overall survival: 63	total RNA	RecoverAll鈩?total nucleic acid isolation kit (Ambion) or the mirVana RNA Isolation Labeling Kit (Ambion) were used. Quality control was performed with NanoDrop 2000 (Thermo Fischer Scientific) and RNA Nano 6000 chip (Agilent).	biotin	Illumina TotalPrep鈩?RNA Amplification Kit was used for synthesis of labeled cRNA.	9606	HumanHT-12 v3.0 Expression BeadChip array (Illumina) was used.	Standard Illumina scanning protocol	SAMPLE 271	Genomestudio, quantile normalization	GPL6947	Yong-Min,,Huh	Yonsei University	50 Shinchon-ro	Seoul	120-749	South Korea	ftp://ftp.ncbi.nlm.nih.gov/geo/samples/GSM2235nnn/GSM2235965/suppl/GSM2235965_5445359023_A_Grn.idat.gz	48708
GSM2235966	Public on Mar 20 2018	Jul 14 2016	Mar 20 2018	RNA	1	Human gastric cancer	Homo sapiens	tissue: gastric cancer	age: 40	Sex: male	ptstage: T4	pnstage: N3	death: 0	duration overall survival: 33	total RNA	RecoverAll鈩?total nucleic acid isolation kit (Ambion) or the mirVana RNA Isolation Labeling Kit (Ambion) were used. Quality control was performed with NanoDrop 2000 (Thermo Fischer Scientific) and RNA Nano 6000 chip (Agilent).	biotin	Illumina TotalPrep鈩?RNA Amplification Kit was used for synthesis of labeled cRNA.	9606	HumanHT-12 v3.0 Expression BeadChip array (Illumina) was used.	Standard Illumina scanning protocol	SAMPLE 272	Genomestudio, quantile normalization	GPL6947	Yong-Min,,Huh	Yonsei University	50 Shinchon-ro	Seoul	120-749	South Korea	ftp://ftp.ncbi.nlm.nih.gov/geo/samples/GSM2235nnn/GSM2235966/suppl/GSM2235966_5445359023_B_Grn.idat.gz	48708
GSM2235967	Public on Mar 20 2018	Jul 14 2016	Mar 20 2018	RNA	1	Human gastric cancer	Homo sapiens	tissue: gastric cancer	age: 61	Sex: male	ptstage: T4	pnstage: N2	death: 1	duration overall survival: 10	total RNA	RecoverAll鈩?total nucleic acid isolation kit (Ambion) or the mirVana RNA Isolation Labeling Kit (Ambion) were used. Quality control was performed with NanoDrop 2000 (Thermo Fischer Scientific) and RNA Nano 6000 chip (Agilent).	biotin	Illumina TotalPrep鈩?RNA Amplification Kit was used for synthesis of labeled cRNA.	9606	HumanHT-12 v3.0 Expression BeadChip array (Illumina) was used.	Standard Illumina scanning protocol	SAMPLE 273	Genomestudio, quantile normalization	GPL6947	Yong-Min,,Huh	Yonsei University	50 Shinchon-ro	Seoul	120-749	South Korea	ftp://ftp.ncbi.nlm.nih.gov/geo/samples/GSM2235nnn/GSM2235967/suppl/GSM2235967_5445359023_C_Grn.idat.gz	48708
GSM2235968	Public on Mar 20 2018	Jul 14 2016	Mar 20 2018	RNA	1	Human gastric cancer	Homo sapiens	tissue: gastric cancer	age: 52	Sex: male	ptstage: T2	pnstage: N0	death: 0	duration overall survival: 59	total RNA	RecoverAll鈩?total nucleic acid isolation kit (Ambion) or the mirVana RNA Isolation Labeling Kit (Ambion) were used. Quality control was performed with NanoDrop 2000 (Thermo Fischer Scientific) and RNA Nano 6000 chip (Agilent).	biotin	Illumina TotalPrep鈩?RNA Amplification Kit was used for synthesis of labeled cRNA.	9606	HumanHT-12 v3.0 Expression BeadChip array (Illumina) was used.	Standard Illumina scanning protocol	SAMPLE 274	Genomestudio, quantile normalization	GPL6947	Yong-Min,,Huh	Yonsei University	50 Shinchon-ro	Seoul	120-749	South Korea	ftp://ftp.ncbi.nlm.nih.gov/geo/samples/GSM2235nnn/GSM2235968/suppl/GSM2235968_5445359023_D_Grn.idat.gz	48708
GSM2235969	Public on Mar 20 2018	Jul 14 2016	Mar 20 2018	RNA	1	Human gastric cancer	Homo sapiens	tissue: gastric cancer	age: 72	Sex: female	ptstage: T2	pnstage: N1	death: 0	duration overall survival: 64	total RNA	RecoverAll鈩?total nucleic acid isolation kit (Ambion) or the mirVana RNA Isolation Labeling Kit (Ambion) were used. Quality control was performed with NanoDrop 2000 (Thermo Fischer Scientific) and RNA Nano 6000 chip (Agilent).	biotin	Illumina TotalPrep鈩?RNA Amplification Kit was used for synthesis of labeled cRNA.	9606	HumanHT-12 v3.0 Expression BeadChip array (Illumina) was used.	Standard Illumina scanning protocol	SAMPLE 275	Genomestudio, quantile normalization	GPL6947	Yong-Min,,Huh	Yonsei University	50 Shinchon-ro	Seoul	120-749	South Korea	ftp://ftp.ncbi.nlm.nih.gov/geo/samples/GSM2235nnn/GSM2235969/suppl/GSM2235969_5445359023_E_Grn.idat.gz	48708
GSM2235970	Public on Mar 20 2018	Jul 14 2016	Mar 20 2018	RNA	1	Human gastric cancer	Homo sapiens	tissue: gastric cancer	age: 66	Sex: female	ptstage: T4	pnstage: N2	death: 1	duration overall survival: 18	total RNA	RecoverAll鈩?total nucleic acid isolation kit (Ambion) or the mirVana RNA Isolation Labeling Kit (Ambion) were used. Quality control was performed with NanoDrop 2000 (Thermo Fischer Scientific) and RNA Nano 6000 chip (Agilent).	biotin	Illumina TotalPrep鈩?RNA Amplification Kit was used for synthesis of labeled cRNA.	9606	HumanHT-12 v3.0 Expression BeadChip array (Illumina) was used.	Standard Illumina scanning protocol	SAMPLE 276	Genomestudio, quantile normalization	GPL6947	Yong-Min,,Huh	Yonsei University	50 Shinchon-ro	Seoul	120-749	South Korea	ftp://ftp.ncbi.nlm.nih.gov/geo/samples/GSM2235nnn/GSM2235970/suppl/GSM2235970_5445359023_F_Grn.idat.gz	48708
GSM2235971	Public on Mar 20 2018	Jul 14 2016	Mar 20 2018	RNA	1	Human gastric cancer	Homo sapiens	tissue: gastric cancer	age: 45	Sex: male	ptstage: T3	pnstage: N2	death: 0	duration overall survival: 63	total RNA	RecoverAll鈩?total nucleic acid isolation kit (Ambion) or the mirVana RNA Isolation Labeling Kit (Ambion) were used. Quality control was performed with NanoDrop 2000 (Thermo Fischer Scientific) and RNA Nano 6000 chip (Agilent).	biotin	Illumina TotalPrep鈩?RNA Amplification Kit was used for synthesis of labeled cRNA.	9606	HumanHT-12 v3.0 Expression BeadChip array (Illumina) was used.	Standard Illumina scanning protocol	SAMPLE 277	Genomestudio, quantile normalization	GPL6947	Yong-Min,,Huh	Yonsei University	50 Shinchon-ro	Seoul	120-749	South Korea	ftp://ftp.ncbi.nlm.nih.gov/geo/samples/GSM2235nnn/GSM2235971/suppl/GSM2235971_5445359023_G_Grn.idat.gz	48708
GSM2235972	Public on Mar 20 2018	Jul 14 2016	Mar 20 2018	RNA	1	Human gastric cancer	Homo sapiens	tissue: gastric cancer	age: 67	Sex: male	ptstage: T4	pnstage: N3	death: 0	duration overall survival: 57	total RNA	RecoverAll鈩?total nucleic acid isolation kit (Ambion) or the mirVana RNA Isolation Labeling Kit (Ambion) were used. Quality control was performed with NanoDrop 2000 (Thermo Fischer Scientific) and RNA Nano 6000 chip (Agilent).	biotin	Illumina TotalPrep鈩?RNA Amplification Kit was used for synthesis of labeled cRNA.	9606	HumanHT-12 v3.0 Expression BeadChip array (Illumina) was used.	Standard Illumina scanning protocol	SAMPLE 278	Genomestudio, quantile normalization	GPL6947	Yong-Min,,Huh	Yonsei University	50 Shinchon-ro	Seoul	120-749	South Korea	ftp://ftp.ncbi.nlm.nih.gov/geo/samples/GSM2235nnn/GSM2235972/suppl/GSM2235972_5445359023_H_Grn.idat.gz	48708
GSM2235973	Public on Mar 20 2018	Jul 14 2016	Mar 20 2018	RNA	1	Human gastric cancer	Homo sapiens	tissue: gastric cancer	age: 59	Sex: female	ptstage: T3	pnstage: N0	death: 0	duration overall survival: 62	total RNA	RecoverAll鈩?total nucleic acid isolation kit (Ambion) or the mirVana RNA Isolation Labeling Kit (Ambion) were used. Quality control was performed with NanoDrop 2000 (Thermo Fischer Scientific) and RNA Nano 6000 chip (Agilent).	biotin	Illumina TotalPrep鈩?RNA Amplification Kit was used for synthesis of labeled cRNA.	9606	HumanHT-12 v3.0 Expression BeadChip array (Illumina) was used.	Standard Illumina scanning protocol	SAMPLE 279	Genomestudio, quantile normalization	GPL6947	Yong-Min,,Huh	Yonsei University	50 Shinchon-ro	Seoul	120-749	South Korea	ftp://ftp.ncbi.nlm.nih.gov/geo/samples/GSM2235nnn/GSM2235973/suppl/GSM2235973_5445359023_I_Grn.idat.gz	48708
GSM2235974	Public on Mar 20 2018	Jul 14 2016	Mar 20 2018	RNA	1	Human gastric cancer	Homo sapiens	tissue: gastric cancer	age: 63	Sex: male	ptstage: T4	pnstage: N2	death: 1	duration overall survival: 12	total RNA	RecoverAll鈩?total nucleic acid isolation kit (Ambion) or the mirVana RNA Isolation Labeling Kit (Ambion) were used. Quality control was performed with NanoDrop 2000 (Thermo Fischer Scientific) and RNA Nano 6000 chip (Agilent).	biotin	Illumina TotalPrep鈩?RNA Amplification Kit was used for synthesis of labeled cRNA.	9606	HumanHT-12 v3.0 Expression BeadChip array (Illumina) was used.	Standard Illumina scanning protocol	SAMPLE 280	Genomestudio, quantile normalization	GPL6947	Yong-Min,,Huh	Yonsei University	50 Shinchon-ro	Seoul	120-749	South Korea	ftp://ftp.ncbi.nlm.nih.gov/geo/samples/GSM2235nnn/GSM2235974/suppl/GSM2235974_5445359023_J_Grn.idat.gz	48708
GSM2235975	Public on Mar 20 2018	Jul 14 2016	Mar 20 2018	RNA	1	Human gastric cancer	Homo sapiens	tissue: gastric cancer	age: 59	Sex: male	ptstage: T3	pnstage: N3	death: 0	duration overall survival: 61	total RNA	RecoverAll鈩?total nucleic acid isolation kit (Ambion) or the mirVana RNA Isolation Labeling Kit (Ambion) were used. Quality control was performed with NanoDrop 2000 (Thermo Fischer Scientific) and RNA Nano 6000 chip (Agilent).	biotin	Illumina TotalPrep鈩?RNA Amplification Kit was used for synthesis of labeled cRNA.	9606	HumanHT-12 v3.0 Expression BeadChip array (Illumina) was used.	Standard Illumina scanning protocol	SAMPLE 281	Genomestudio, quantile normalization	GPL6947	Yong-Min,,Huh	Yonsei University	50 Shinchon-ro	Seoul	120-749	South Korea	ftp://ftp.ncbi.nlm.nih.gov/geo/samples/GSM2235nnn/GSM2235975/suppl/GSM2235975_5445359023_K_Grn.idat.gz	48708
GSM2235976	Public on Mar 20 2018	Jul 14 2016	Mar 20 2018	RNA	1	Human gastric cancer	Homo sapiens	tissue: gastric cancer	age: 67	Sex: female	ptstage: T3	pnstage: N1	death: 0	duration overall survival: 55	total RNA	RecoverAll鈩?total nucleic acid isolation kit (Ambion) or the mirVana RNA Isolation Labeling Kit (Ambion) were used. Quality control was performed with NanoDrop 2000 (Thermo Fischer Scientific) and RNA Nano 6000 chip (Agilent).	biotin	Illumina TotalPrep鈩?RNA Amplification Kit was used for synthesis of labeled cRNA.	9606	HumanHT-12 v3.0 Expression BeadChip array (Illumina) was used.	Standard Illumina scanning protocol	SAMPLE 282	Genomestudio, quantile normalization	GPL6947	Yong-Min,,Huh	Yonsei University	50 Shinchon-ro	Seoul	120-749	South Korea	ftp://ftp.ncbi.nlm.nih.gov/geo/samples/GSM2235nnn/GSM2235976/suppl/GSM2235976_5445359023_L_Grn.idat.gz	48708
GSM2235977	Public on Mar 20 2018	Jul 14 2016	Mar 20 2018	RNA	1	Human gastric cancer	Homo sapiens	tissue: gastric cancer	age: 72	Sex: male	ptstage: T4	pnstage: N2	death: 1	duration overall survival: 7	total RNA	RecoverAll鈩?total nucleic acid isolation kit (Ambion) or the mirVana RNA Isolation Labeling Kit (Ambion) were used. Quality control was performed with NanoDrop 2000 (Thermo Fischer Scientific) and RNA Nano 6000 chip (Agilent).	biotin	Illumina TotalPrep鈩?RNA Amplification Kit was used for synthesis of labeled cRNA.	9606	HumanHT-12 v3.0 Expression BeadChip array (Illumina) was used.	Standard Illumina scanning protocol	SAMPLE 283	Genomestudio, quantile normalization	GPL6947	Yong-Min,,Huh	Yonsei University	50 Shinchon-ro	Seoul	120-749	South Korea	ftp://ftp.ncbi.nlm.nih.gov/geo/samples/GSM2235nnn/GSM2235977/suppl/GSM2235977_5445359024_A_Grn.idat.gz	48708
GSM2235978	Public on Mar 20 2018	Jul 14 2016	Mar 20 2018	RNA	1	Human gastric cancer	Homo sapiens	tissue: gastric cancer	age: 65	Sex: male	ptstage: T4	pnstage: N2	death: 0	duration overall survival: 34	total RNA	RecoverAll鈩?total nucleic acid isolation kit (Ambion) or the mirVana RNA Isolation Labeling Kit (Ambion) were used. Quality control was performed with NanoDrop 2000 (Thermo Fischer Scientific) and RNA Nano 6000 chip (Agilent).	biotin	Illumina TotalPrep鈩?RNA Amplification Kit was used for synthesis of labeled cRNA.	9606	HumanHT-12 v3.0 Expression BeadChip array (Illumina) was used.	Standard Illumina scanning protocol	SAMPLE 284	Genomestudio, quantile normalization	GPL6947	Yong-Min,,Huh	Yonsei University	50 Shinchon-ro	Seoul	120-749	South Korea	ftp://ftp.ncbi.nlm.nih.gov/geo/samples/GSM2235nnn/GSM2235978/suppl/GSM2235978_5445359024_B_Grn.idat.gz	48708
GSM2235979	Public on Mar 20 2018	Jul 14 2016	Mar 20 2018	RNA	1	Human gastric cancer	Homo sapiens	tissue: gastric cancer	age: 54	Sex: female	ptstage: T2	pnstage: N1	death: 0	duration overall survival: 42	total RNA	RecoverAll鈩?total nucleic acid isolation kit (Ambion) or the mirVana RNA Isolation Labeling Kit (Ambion) were used. Quality control was performed with NanoDrop 2000 (Thermo Fischer Scientific) and RNA Nano 6000 chip (Agilent).	biotin	Illumina TotalPrep鈩?RNA Amplification Kit was used for synthesis of labeled cRNA.	9606	HumanHT-12 v3.0 Expression BeadChip array (Illumina) was used.	Standard Illumina scanning protocol	SAMPLE 285	Genomestudio, quantile normalization	GPL6947	Yong-Min,,Huh	Yonsei University	50 Shinchon-ro	Seoul	120-749	South Korea	ftp://ftp.ncbi.nlm.nih.gov/geo/samples/GSM2235nnn/GSM2235979/suppl/GSM2235979_5445359024_C_Grn.idat.gz	48708
GSM2235980	Public on Mar 20 2018	Jul 14 2016	Mar 20 2018	RNA	1	Human gastric cancer	Homo sapiens	tissue: gastric cancer	age: 66	Sex: male	ptstage: T4	pnstage: N1	death: 1	duration overall survival: 6	total RNA	RecoverAll鈩?total nucleic acid isolation kit (Ambion) or the mirVana RNA Isolation Labeling Kit (Ambion) were used. Quality control was performed with NanoDrop 2000 (Thermo Fischer Scientific) and RNA Nano 6000 chip (Agilent).	biotin	Illumina TotalPrep鈩?RNA Amplification Kit was used for synthesis of labeled cRNA.	9606	HumanHT-12 v3.0 Expression BeadChip array (Illumina) was used.	Standard Illumina scanning protocol	SAMPLE 286	Genomestudio, quantile normalization	GPL6947	Yong-Min,,Huh	Yonsei University	50 Shinchon-ro	Seoul	120-749	South Korea	ftp://ftp.ncbi.nlm.nih.gov/geo/samples/GSM2235nnn/GSM2235980/suppl/GSM2235980_5445359024_D_Grn.idat.gz	48708
GSM2235981	Public on Mar 20 2018	Jul 14 2016	Mar 20 2018	RNA	1	Human gastric cancer	Homo sapiens	tissue: gastric cancer	age: 69	Sex: male	ptstage: T4	pnstage: N1	death: 0	duration overall survival: 36	total RNA	RecoverAll鈩?total nucleic acid isolation kit (Ambion) or the mirVana RNA Isolation Labeling Kit (Ambion) were used. Quality control was performed with NanoDrop 2000 (Thermo Fischer Scientific) and RNA Nano 6000 chip (Agilent).	biotin	Illumina TotalPrep鈩?RNA Amplification Kit was used for synthesis of labeled cRNA.	9606	HumanHT-12 v3.0 Expression BeadChip array (Illumina) was used.	Standard Illumina scanning protocol	SAMPLE 287	Genomestudio, quantile normalization	GPL6947	Yong-Min,,Huh	Yonsei University	50 Shinchon-ro	Seoul	120-749	South Korea	ftp://ftp.ncbi.nlm.nih.gov/geo/samples/GSM2235nnn/GSM2235981/suppl/GSM2235981_5445359024_E_Grn.idat.gz	48708
GSM2235982	Public on Mar 20 2018	Jul 14 2016	Mar 20 2018	RNA	1	Human gastric cancer	Homo sapiens	tissue: gastric cancer	age: 51	Sex: male	ptstage: T3	pnstage: N2	death: 0	duration overall survival: 37	total RNA	RecoverAll鈩?total nucleic acid isolation kit (Ambion) or the mirVana RNA Isolation Labeling Kit (Ambion) were used. Quality control was performed with NanoDrop 2000 (Thermo Fischer Scientific) and RNA Nano 6000 chip (Agilent).	biotin	Illumina TotalPrep鈩?RNA Amplification Kit was used for synthesis of labeled cRNA.	9606	HumanHT-12 v3.0 Expression BeadChip array (Illumina) was used.	Standard Illumina scanning protocol	SAMPLE 288	Genomestudio, quantile normalization	GPL6947	Yong-Min,,Huh	Yonsei University	50 Shinchon-ro	Seoul	120-749	South Korea	ftp://ftp.ncbi.nlm.nih.gov/geo/samples/GSM2235nnn/GSM2235982/suppl/GSM2235982_5445359024_F_Grn.idat.gz	48708
GSM2235983	Public on Mar 20 2018	Jul 14 2016	Mar 20 2018	RNA	1	Human gastric cancer	Homo sapiens	tissue: gastric cancer	age: 46	Sex: male	ptstage: T3	pnstage: N1	death: 0	duration overall survival: 38	total RNA	RecoverAll鈩?total nucleic acid isolation kit (Ambion) or the mirVana RNA Isolation Labeling Kit (Ambion) were used. Quality control was performed with NanoDrop 2000 (Thermo Fischer Scientific) and RNA Nano 6000 chip (Agilent).	biotin	Illumina TotalPrep鈩?RNA Amplification Kit was used for synthesis of labeled cRNA.	9606	HumanHT-12 v3.0 Expression BeadChip array (Illumina) was used.	Standard Illumina scanning protocol	SAMPLE 289	Genomestudio, quantile normalization	GPL6947	Yong-Min,,Huh	Yonsei University	50 Shinchon-ro	Seoul	120-749	South Korea	ftp://ftp.ncbi.nlm.nih.gov/geo/samples/GSM2235nnn/GSM2235983/suppl/GSM2235983_5445359024_G_Grn.idat.gz	48708
GSM2235984	Public on Mar 20 2018	Jul 14 2016	Mar 20 2018	RNA	1	Human gastric cancer	Homo sapiens	tissue: gastric cancer	age: 69	Sex: male	ptstage: T4	pnstage: N3	death: 1	duration overall survival: 8	total RNA	RecoverAll鈩?total nucleic acid isolation kit (Ambion) or the mirVana RNA Isolation Labeling Kit (Ambion) were used. Quality control was performed with NanoDrop 2000 (Thermo Fischer Scientific) and RNA Nano 6000 chip (Agilent).	biotin	Illumina TotalPrep鈩?RNA Amplification Kit was used for synthesis of labeled cRNA.	9606	HumanHT-12 v3.0 Expression BeadChip array (Illumina) was used.	Standard Illumina scanning protocol	SAMPLE 290	Genomestudio, quantile normalization	GPL6947	Yong-Min,,Huh	Yonsei University	50 Shinchon-ro	Seoul	120-749	South Korea	ftp://ftp.ncbi.nlm.nih.gov/geo/samples/GSM2235nnn/GSM2235984/suppl/GSM2235984_5445359024_H_Grn.idat.gz	48708
GSM2235985	Public on Mar 20 2018	Jul 14 2016	Mar 20 2018	RNA	1	Human gastric cancer	Homo sapiens	tissue: gastric cancer	age: 69	Sex: female	ptstage: T4	pnstage: N3	death: 0	duration overall survival: 35	total RNA	RecoverAll鈩?total nucleic acid isolation kit (Ambion) or the mirVana RNA Isolation Labeling Kit (Ambion) were used. Quality control was performed with NanoDrop 2000 (Thermo Fischer Scientific) and RNA Nano 6000 chip (Agilent).	biotin	Illumina TotalPrep鈩?RNA Amplification Kit was used for synthesis of labeled cRNA.	9606	HumanHT-12 v3.0 Expression BeadChip array (Illumina) was used.	Standard Illumina scanning protocol	SAMPLE 291	Genomestudio, quantile normalization	GPL6947	Yong-Min,,Huh	Yonsei University	50 Shinchon-ro	Seoul	120-749	South Korea	ftp://ftp.ncbi.nlm.nih.gov/geo/samples/GSM2235nnn/GSM2235985/suppl/GSM2235985_5445359024_I_Grn.idat.gz	48708
GSM2235986	Public on Mar 20 2018	Jul 14 2016	Mar 20 2018	RNA	1	Human gastric cancer	Homo sapiens	tissue: gastric cancer	age: 53	Sex: female	ptstage: T3	pnstage: N3	death: 0	duration overall survival: 35	total RNA	RecoverAll鈩?total nucleic acid isolation kit (Ambion) or the mirVana RNA Isolation Labeling Kit (Ambion) were used. Quality control was performed with NanoDrop 2000 (Thermo Fischer Scientific) and RNA Nano 6000 chip (Agilent).	biotin	Illumina TotalPrep鈩?RNA Amplification Kit was used for synthesis of labeled cRNA.	9606	HumanHT-12 v3.0 Expression BeadChip array (Illumina) was used.	Standard Illumina scanning protocol	SAMPLE 292	Genomestudio, quantile normalization	GPL6947	Yong-Min,,Huh	Yonsei University	50 Shinchon-ro	Seoul	120-749	South Korea	ftp://ftp.ncbi.nlm.nih.gov/geo/samples/GSM2235nnn/GSM2235986/suppl/GSM2235986_5445359024_J_Grn.idat.gz	48708
GSM2235987	Public on Mar 20 2018	Jul 14 2016	Mar 20 2018	RNA	1	Human gastric cancer	Homo sapiens	tissue: gastric cancer	age: 69	Sex: male	ptstage: T4	pnstage: N1	death: 0	duration overall survival: 35	total RNA	RecoverAll鈩?total nucleic acid isolation kit (Ambion) or the mirVana RNA Isolation Labeling Kit (Ambion) were used. Quality control was performed with NanoDrop 2000 (Thermo Fischer Scientific) and RNA Nano 6000 chip (Agilent).	biotin	Illumina TotalPrep鈩?RNA Amplification Kit was used for synthesis of labeled cRNA.	9606	HumanHT-12 v3.0 Expression BeadChip array (Illumina) was used.	Standard Illumina scanning protocol	SAMPLE 293	Genomestudio, quantile normalization	GPL6947	Yong-Min,,Huh	Yonsei University	50 Shinchon-ro	Seoul	120-749	South Korea	ftp://ftp.ncbi.nlm.nih.gov/geo/samples/GSM2235nnn/GSM2235987/suppl/GSM2235987_5445359024_K_Grn.idat.gz	48708
GSM2235988	Public on Mar 20 2018	Jul 14 2016	Mar 20 2018	RNA	1	Human gastric cancer	Homo sapiens	tissue: gastric cancer	age: 54	Sex: female	ptstage: T1	pnstage: N0	death: 0	duration overall survival: 70	total RNA	RecoverAll鈩?total nucleic acid isolation kit (Ambion) or the mirVana RNA Isolation Labeling Kit (Ambion) were used. Quality control was performed with NanoDrop 2000 (Thermo Fischer Scientific) and RNA Nano 6000 chip (Agilent).	biotin	Illumina TotalPrep鈩?RNA Amplification Kit was used for synthesis of labeled cRNA.	9606	HumanHT-12 v3.0 Expression BeadChip array (Illumina) was used.	Standard Illumina scanning protocol	SAMPLE 294	Genomestudio, quantile normalization	GPL6947	Yong-Min,,Huh	Yonsei University	50 Shinchon-ro	Seoul	120-749	South Korea	ftp://ftp.ncbi.nlm.nih.gov/geo/samples/GSM2235nnn/GSM2235988/suppl/GSM2235988_5445359024_L_Grn.idat.gz	48708
GSM2235991	Public on Mar 20 2018	Jul 14 2016	Mar 20 2018	RNA	1	Human gastric cancer	Homo sapiens	tissue: gastric cancer	age: 77	Sex: male	ptstage: T3	pnstage: N2	death: 1	duration overall survival: 32	total RNA	RecoverAll鈩?total nucleic acid isolation kit (Ambion) or the mirVana RNA Isolation Labeling Kit (Ambion) were used. Quality control was performed with NanoDrop 2000 (Thermo Fischer Scientific) and RNA Nano 6000 chip (Agilent).	biotin	Illumina TotalPrep鈩?RNA Amplification Kit was used for synthesis of labeled cRNA.	9606	HumanHT-12 v3.0 Expression BeadChip array (Illumina) was used.	Standard Illumina scanning protocol	SAMPLE 297	Genomestudio, quantile normalization	GPL6947	Yong-Min,,Huh	Yonsei University	50 Shinchon-ro	Seoul	120-749	South Korea	ftp://ftp.ncbi.nlm.nih.gov/geo/samples/GSM2235nnn/GSM2235991/suppl/GSM2235991_5445359026_C_Grn.idat.gz	48708
GSM2235992	Public on Mar 20 2018	Jul 14 2016	Mar 20 2018	RNA	1	Human gastric cancer	Homo sapiens	tissue: gastric cancer	age: 59	Sex: male	ptstage: T4	pnstage: N1	death: 0	duration overall survival: 128	total RNA	RecoverAll鈩?total nucleic acid isolation kit (Ambion) or the mirVana RNA Isolation Labeling Kit (Ambion) were used. Quality control was performed with NanoDrop 2000 (Thermo Fischer Scientific) and RNA Nano 6000 chip (Agilent).	biotin	Illumina TotalPrep鈩?RNA Amplification Kit was used for synthesis of labeled cRNA.	9606	HumanHT-12 v3.0 Expression BeadChip array (Illumina) was used.	Standard Illumina scanning protocol	SAMPLE 298	Genomestudio, quantile normalization	GPL6947	Yong-Min,,Huh	Yonsei University	50 Shinchon-ro	Seoul	120-749	South Korea	ftp://ftp.ncbi.nlm.nih.gov/geo/samples/GSM2235nnn/GSM2235992/suppl/GSM2235992_5445359026_D_Grn.idat.gz	48708
GSM2235993	Public on Mar 20 2018	Jul 14 2016	Mar 20 2018	RNA	1	Human gastric cancer	Homo sapiens	tissue: gastric cancer	age: 27	Sex: male	ptstage: T3	pnstage: N1	death: 0	duration overall survival: 126	total RNA	RecoverAll鈩?total nucleic acid isolation kit (Ambion) or the mirVana RNA Isolation Labeling Kit (Ambion) were used. Quality control was performed with NanoDrop 2000 (Thermo Fischer Scientific) and RNA Nano 6000 chip (Agilent).	biotin	Illumina TotalPrep鈩?RNA Amplification Kit was used for synthesis of labeled cRNA.	9606	HumanHT-12 v3.0 Expression BeadChip array (Illumina) was used.	Standard Illumina scanning protocol	SAMPLE 299	Genomestudio, quantile normalization	GPL6947	Yong-Min,,Huh	Yonsei University	50 Shinchon-ro	Seoul	120-749	South Korea	ftp://ftp.ncbi.nlm.nih.gov/geo/samples/GSM2235nnn/GSM2235993/suppl/GSM2235993_5445359026_E_Grn.idat.gz	48708
GSM2235994	Public on Mar 20 2018	Jul 14 2016	Mar 20 2018	RNA	1	Human gastric cancer	Homo sapiens	tissue: gastric cancer	age: 42	Sex: female	ptstage: T3	pnstage: N1	death: 0	duration overall survival: 123	total RNA	RecoverAll鈩?total nucleic acid isolation kit (Ambion) or the mirVana RNA Isolation Labeling Kit (Ambion) were used. Quality control was performed with NanoDrop 2000 (Thermo Fischer Scientific) and RNA Nano 6000 chip (Agilent).	biotin	Illumina TotalPrep鈩?RNA Amplification Kit was used for synthesis of labeled cRNA.	9606	HumanHT-12 v3.0 Expression BeadChip array (Illumina) was used.	Standard Illumina scanning protocol	SAMPLE 300	Genomestudio, quantile normalization	GPL6947	Yong-Min,,Huh	Yonsei University	50 Shinchon-ro	Seoul	120-749	South Korea	ftp://ftp.ncbi.nlm.nih.gov/geo/samples/GSM2235nnn/GSM2235994/suppl/GSM2235994_5445359026_F_Grn.idat.gz	48708
GSM2235995	Public on Mar 20 2018	Jul 14 2016	Mar 20 2018	RNA	1	Human gastric cancer	Homo sapiens	tissue: gastric cancer	age: 57	Sex: female	ptstage: T3	pnstage: N2	death: 1	duration overall survival: 10	total RNA	RecoverAll鈩?total nucleic acid isolation kit (Ambion) or the mirVana RNA Isolation Labeling Kit (Ambion) were used. Quality control was performed with NanoDrop 2000 (Thermo Fischer Scientific) and RNA Nano 6000 chip (Agilent).	biotin	Illumina TotalPrep鈩?RNA Amplification Kit was used for synthesis of labeled cRNA.	9606	HumanHT-12 v3.0 Expression BeadChip array (Illumina) was used.	Standard Illumina scanning protocol	SAMPLE 301	Genomestudio, quantile normalization	GPL6947	Yong-Min,,Huh	Yonsei University	50 Shinchon-ro	Seoul	120-749	South Korea	ftp://ftp.ncbi.nlm.nih.gov/geo/samples/GSM2235nnn/GSM2235995/suppl/GSM2235995_5445359026_G_Grn.idat.gz	48708
GSM2235996	Public on Mar 20 2018	Jul 14 2016	Mar 20 2018	RNA	1	Human gastric cancer	Homo sapiens	tissue: gastric cancer	age: 53	Sex: female	ptstage: T4	pnstage: N1	death: 1	duration overall survival: 6	total RNA	RecoverAll鈩?total nucleic acid isolation kit (Ambion) or the mirVana RNA Isolation Labeling Kit (Ambion) were used. Quality control was performed with NanoDrop 2000 (Thermo Fischer Scientific) and RNA Nano 6000 chip (Agilent).	biotin	Illumina TotalPrep鈩?RNA Amplification Kit was used for synthesis of labeled cRNA.	9606	HumanHT-12 v3.0 Expression BeadChip array (Illumina) was used.	Standard Illumina scanning protocol	SAMPLE 302	Genomestudio, quantile normalization	GPL6947	Yong-Min,,Huh	Yonsei University	50 Shinchon-ro	Seoul	120-749	South Korea	ftp://ftp.ncbi.nlm.nih.gov/geo/samples/GSM2235nnn/GSM2235996/suppl/GSM2235996_5445359026_I_Grn.idat.gz	48708
GSM2235997	Public on Mar 20 2018	Jul 14 2016	Mar 20 2018	RNA	1	Human gastric cancer	Homo sapiens	tissue: gastric cancer	age: 74	Sex: male	ptstage: T4	pnstage: N1	death: 0	duration overall survival: 128	total RNA	RecoverAll鈩?total nucleic acid isolation kit (Ambion) or the mirVana RNA Isolation Labeling Kit (Ambion) were used. Quality control was performed with NanoDrop 2000 (Thermo Fischer Scientific) and RNA Nano 6000 chip (Agilent).	biotin	Illumina TotalPrep鈩?RNA Amplification Kit was used for synthesis of labeled cRNA.	9606	HumanHT-12 v3.0 Expression BeadChip array (Illumina) was used.	Standard Illumina scanning protocol	SAMPLE 303	Genomestudio, quantile normalization	GPL6947	Yong-Min,,Huh	Yonsei University	50 Shinchon-ro	Seoul	120-749	South Korea	ftp://ftp.ncbi.nlm.nih.gov/geo/samples/GSM2235nnn/GSM2235997/suppl/GSM2235997_5445359026_J_Grn.idat.gz	48708
GSM2235998	Public on Mar 20 2018	Jul 14 2016	Mar 20 2018	RNA	1	Human gastric cancer	Homo sapiens	tissue: gastric cancer	age: 68	Sex: male	ptstage: T4	pnstage: N1	death: 0	duration overall survival: 122	total RNA	RecoverAll鈩?total nucleic acid isolation kit (Ambion) or the mirVana RNA Isolation Labeling Kit (Ambion) were used. Quality control was performed with NanoDrop 2000 (Thermo Fischer Scientific) and RNA Nano 6000 chip (Agilent).	biotin	Illumina TotalPrep鈩?RNA Amplification Kit was used for synthesis of labeled cRNA.	9606	HumanHT-12 v3.0 Expression BeadChip array (Illumina) was used.	Standard Illumina scanning protocol	SAMPLE 304	Genomestudio, quantile normalization	GPL6947	Yong-Min,,Huh	Yonsei University	50 Shinchon-ro	Seoul	120-749	South Korea	ftp://ftp.ncbi.nlm.nih.gov/geo/samples/GSM2235nnn/GSM2235998/suppl/GSM2235998_5445359026_K_Grn.idat.gz	48708
GSM2235999	Public on Mar 20 2018	Jul 14 2016	Mar 20 2018	RNA	1	Human gastric cancer	Homo sapiens	tissue: gastric cancer	age: 60	Sex: male	ptstage: T4	pnstage: N1	death: 1	duration overall survival: 95	total RNA	RecoverAll鈩?total nucleic acid isolation kit (Ambion) or the mirVana RNA Isolation Labeling Kit (Ambion) were used. Quality control was performed with NanoDrop 2000 (Thermo Fischer Scientific) and RNA Nano 6000 chip (Agilent).	biotin	Illumina TotalPrep鈩?RNA Amplification Kit was used for synthesis of labeled cRNA.	9606	HumanHT-12 v3.0 Expression BeadChip array (Illumina) was used.	Standard Illumina scanning protocol	SAMPLE 305	Genomestudio, quantile normalization	GPL6947	Yong-Min,,Huh	Yonsei University	50 Shinchon-ro	Seoul	120-749	South Korea	ftp://ftp.ncbi.nlm.nih.gov/geo/samples/GSM2235nnn/GSM2235999/suppl/GSM2235999_5445359026_L_Grn.idat.gz	48708
GSM2236000	Public on Mar 20 2018	Jul 14 2016	Mar 20 2018	RNA	1	Human gastric cancer	Homo sapiens	tissue: gastric cancer	age: 64	Sex: female	ptstage: T3	pnstage: N1	death: 0	duration overall survival: 122	total RNA	RecoverAll鈩?total nucleic acid isolation kit (Ambion) or the mirVana RNA Isolation Labeling Kit (Ambion) were used. Quality control was performed with NanoDrop 2000 (Thermo Fischer Scientific) and RNA Nano 6000 chip (Agilent).	biotin	Illumina TotalPrep鈩?RNA Amplification Kit was used for synthesis of labeled cRNA.	9606	HumanHT-12 v3.0 Expression BeadChip array (Illumina) was used.	Standard Illumina scanning protocol	SAMPLE 306	Genomestudio, quantile normalization	GPL6947	Yong-Min,,Huh	Yonsei University	50 Shinchon-ro	Seoul	120-749	South Korea	ftp://ftp.ncbi.nlm.nih.gov/geo/samples/GSM2236nnn/GSM2236000/suppl/GSM2236000_5445359027_A_Grn.idat.gz	48708
GSM2236001	Public on Mar 20 2018	Jul 14 2016	Mar 20 2018	RNA	1	Human gastric cancer	Homo sapiens	tissue: gastric cancer	age: 48	Sex: female	ptstage: T4	pnstage: N2	death: 0	duration overall survival: 124	total RNA	RecoverAll鈩?total nucleic acid isolation kit (Ambion) or the mirVana RNA Isolation Labeling Kit (Ambion) were used. Quality control was performed with NanoDrop 2000 (Thermo Fischer Scientific) and RNA Nano 6000 chip (Agilent).	biotin	Illumina TotalPrep鈩?RNA Amplification Kit was used for synthesis of labeled cRNA.	9606	HumanHT-12 v3.0 Expression BeadChip array (Illumina) was used.	Standard Illumina scanning protocol	SAMPLE 307	Genomestudio, quantile normalization	GPL6947	Yong-Min,,Huh	Yonsei University	50 Shinchon-ro	Seoul	120-749	South Korea	ftp://ftp.ncbi.nlm.nih.gov/geo/samples/GSM2236nnn/GSM2236001/suppl/GSM2236001_5445359027_B_Grn.idat.gz	48708
GSM2236002	Public on Mar 20 2018	Jul 14 2016	Mar 20 2018	RNA	1	Human gastric cancer	Homo sapiens	tissue: gastric cancer	age: 68	Sex: female	ptstage: T4	pnstage: N1	death: 0	duration overall survival: 129	total RNA	RecoverAll鈩?total nucleic acid isolation kit (Ambion) or the mirVana RNA Isolation Labeling Kit (Ambion) were used. Quality control was performed with NanoDrop 2000 (Thermo Fischer Scientific) and RNA Nano 6000 chip (Agilent).	biotin	Illumina TotalPrep鈩?RNA Amplification Kit was used for synthesis of labeled cRNA.	9606	HumanHT-12 v3.0 Expression BeadChip array (Illumina) was used.	Standard Illumina scanning protocol	SAMPLE 308	Genomestudio, quantile normalization	GPL6947	Yong-Min,,Huh	Yonsei University	50 Shinchon-ro	Seoul	120-749	South Korea	ftp://ftp.ncbi.nlm.nih.gov/geo/samples/GSM2236nnn/GSM2236002/suppl/GSM2236002_5445359027_C_Grn.idat.gz	48708
GSM2236003	Public on Mar 20 2018	Jul 14 2016	Mar 20 2018	RNA	1	Human gastric cancer	Homo sapiens	tissue: gastric cancer	age: 55	Sex: male	ptstage: T4	pnstage: N1	death: 0	duration overall survival: 126	total RNA	RecoverAll鈩?total nucleic acid isolation kit (Ambion) or the mirVana RNA Isolation Labeling Kit (Ambion) were used. Quality control was performed with NanoDrop 2000 (Thermo Fischer Scientific) and RNA Nano 6000 chip (Agilent).	biotin	Illumina TotalPrep鈩?RNA Amplification Kit was used for synthesis of labeled cRNA.	9606	HumanHT-12 v3.0 Expression BeadChip array (Illumina) was used.	Standard Illumina scanning protocol	SAMPLE 309	Genomestudio, quantile normalization	GPL6947	Yong-Min,,Huh	Yonsei University	50 Shinchon-ro	Seoul	120-749	South Korea	ftp://ftp.ncbi.nlm.nih.gov/geo/samples/GSM2236nnn/GSM2236003/suppl/GSM2236003_5445359027_D_Grn.idat.gz	48708
GSM2236004	Public on Mar 20 2018	Jul 14 2016	Mar 20 2018	RNA	1	Human gastric cancer	Homo sapiens	tissue: gastric cancer	age: 66	Sex: male	ptstage: T4	pnstage: N1	death: 1	duration overall survival: 46	total RNA	RecoverAll鈩?total nucleic acid isolation kit (Ambion) or the mirVana RNA Isolation Labeling Kit (Ambion) were used. Quality control was performed with NanoDrop 2000 (Thermo Fischer Scientific) and RNA Nano 6000 chip (Agilent).	biotin	Illumina TotalPrep鈩?RNA Amplification Kit was used for synthesis of labeled cRNA.	9606	HumanHT-12 v3.0 Expression BeadChip array (Illumina) was used.	Standard Illumina scanning protocol	SAMPLE 310	Genomestudio, quantile normalization	GPL6947	Yong-Min,,Huh	Yonsei University	50 Shinchon-ro	Seoul	120-749	South Korea	ftp://ftp.ncbi.nlm.nih.gov/geo/samples/GSM2236nnn/GSM2236004/suppl/GSM2236004_5445359027_E_Grn.idat.gz	48708
GSM2236005	Public on Mar 20 2018	Jul 14 2016	Mar 20 2018	RNA	1	Human gastric cancer	Homo sapiens	tissue: gastric cancer	age: 72	Sex: female	ptstage: T4	pnstage: N2	death: 1	duration overall survival: 9	total RNA	RecoverAll鈩?total nucleic acid isolation kit (Ambion) or the mirVana RNA Isolation Labeling Kit (Ambion) were used. Quality control was performed with NanoDrop 2000 (Thermo Fischer Scientific) and RNA Nano 6000 chip (Agilent).	biotin	Illumina TotalPrep鈩?RNA Amplification Kit was used for synthesis of labeled cRNA.	9606	HumanHT-12 v3.0 Expression BeadChip array (Illumina) was used.	Standard Illumina scanning protocol	SAMPLE 311	Genomestudio, quantile normalization	GPL6947	Yong-Min,,Huh	Yonsei University	50 Shinchon-ro	Seoul	120-749	South Korea	ftp://ftp.ncbi.nlm.nih.gov/geo/samples/GSM2236nnn/GSM2236005/suppl/GSM2236005_5445359027_F_Grn.idat.gz	48708
GSM2236006	Public on Mar 20 2018	Jul 14 2016	Mar 20 2018	RNA	1	Human gastric cancer	Homo sapiens	tissue: gastric cancer	age: 42	Sex: male	ptstage: T4	pnstage: N1	death: 1	duration overall survival: 24	total RNA	RecoverAll鈩?total nucleic acid isolation kit (Ambion) or the mirVana RNA Isolation Labeling Kit (Ambion) were used. Quality control was performed with NanoDrop 2000 (Thermo Fischer Scientific) and RNA Nano 6000 chip (Agilent).	biotin	Illumina TotalPrep鈩?RNA Amplification Kit was used for synthesis of labeled cRNA.	9606	HumanHT-12 v3.0 Expression BeadChip array (Illumina) was used.	Standard Illumina scanning protocol	SAMPLE 312	Genomestudio, quantile normalization	GPL6947	Yong-Min,,Huh	Yonsei University	50 Shinchon-ro	Seoul	120-749	South Korea	ftp://ftp.ncbi.nlm.nih.gov/geo/samples/GSM2236nnn/GSM2236006/suppl/GSM2236006_5445359027_G_Grn.idat.gz	48708
GSM2236007	Public on Mar 20 2018	Jul 14 2016	Mar 20 2018	RNA	1	Human gastric cancer	Homo sapiens	tissue: gastric cancer	age: 76	Sex: female	ptstage: T4	pnstage: N1	death: 1	duration overall survival: 21	total RNA	RecoverAll鈩?total nucleic acid isolation kit (Ambion) or the mirVana RNA Isolation Labeling Kit (Ambion) were used. Quality control was performed with NanoDrop 2000 (Thermo Fischer Scientific) and RNA Nano 6000 chip (Agilent).	biotin	Illumina TotalPrep鈩?RNA Amplification Kit was used for synthesis of labeled cRNA.	9606	HumanHT-12 v3.0 Expression BeadChip array (Illumina) was used.	Standard Illumina scanning protocol	SAMPLE 313	Genomestudio, quantile normalization	GPL6947	Yong-Min,,Huh	Yonsei University	50 Shinchon-ro	Seoul	120-749	South Korea	ftp://ftp.ncbi.nlm.nih.gov/geo/samples/GSM2236nnn/GSM2236007/suppl/GSM2236007_5445359027_H_Grn.idat.gz	48708
GSM2236008	Public on Mar 20 2018	Jul 14 2016	Mar 20 2018	RNA	1	Human gastric cancer	Homo sapiens	tissue: gastric cancer	age: 64	Sex: female	ptstage: T3	pnstage: N1	death: 1	duration overall survival: 30	total RNA	RecoverAll鈩?total nucleic acid isolation kit (Ambion) or the mirVana RNA Isolation Labeling Kit (Ambion) were used. Quality control was performed with NanoDrop 2000 (Thermo Fischer Scientific) and RNA Nano 6000 chip (Agilent).	biotin	Illumina TotalPrep鈩?RNA Amplification Kit was used for synthesis of labeled cRNA.	9606	HumanHT-12 v3.0 Expression BeadChip array (Illumina) was used.	Standard Illumina scanning protocol	SAMPLE 314	Genomestudio, quantile normalization	GPL6947	Yong-Min,,Huh	Yonsei University	50 Shinchon-ro	Seoul	120-749	South Korea	ftp://ftp.ncbi.nlm.nih.gov/geo/samples/GSM2236nnn/GSM2236008/suppl/GSM2236008_5445359027_I_Grn.idat.gz	48708
GSM2236009	Public on Mar 20 2018	Jul 14 2016	Mar 20 2018	RNA	1	Human gastric cancer	Homo sapiens	tissue: gastric cancer	age: 66	Sex: male	ptstage: T4	pnstage: N1	death: 1	duration overall survival: 27	total RNA	RecoverAll鈩?total nucleic acid isolation kit (Ambion) or the mirVana RNA Isolation Labeling Kit (Ambion) were used. Quality control was performed with NanoDrop 2000 (Thermo Fischer Scientific) and RNA Nano 6000 chip (Agilent).	biotin	Illumina TotalPrep鈩?RNA Amplification Kit was used for synthesis of labeled cRNA.	9606	HumanHT-12 v3.0 Expression BeadChip array (Illumina) was used.	Standard Illumina scanning protocol	SAMPLE 315	Genomestudio, quantile normalization	GPL6947	Yong-Min,,Huh	Yonsei University	50 Shinchon-ro	Seoul	120-749	South Korea	ftp://ftp.ncbi.nlm.nih.gov/geo/samples/GSM2236nnn/GSM2236009/suppl/GSM2236009_5445359027_J_Grn.idat.gz	48708
GSM2236010	Public on Mar 20 2018	Jul 14 2016	Mar 20 2018	RNA	1	Human gastric cancer	Homo sapiens	tissue: gastric cancer	age: 61	Sex: male	ptstage: T4	pnstage: N1	death: 1	duration overall survival: 38	total RNA	RecoverAll鈩?total nucleic acid isolation kit (Ambion) or the mirVana RNA Isolation Labeling Kit (Ambion) were used. Quality control was performed with NanoDrop 2000 (Thermo Fischer Scientific) and RNA Nano 6000 chip (Agilent).	biotin	Illumina TotalPrep鈩?RNA Amplification Kit was used for synthesis of labeled cRNA.	9606	HumanHT-12 v3.0 Expression BeadChip array (Illumina) was used.	Standard Illumina scanning protocol	SAMPLE 316	Genomestudio, quantile normalization	GPL6947	Yong-Min,,Huh	Yonsei University	50 Shinchon-ro	Seoul	120-749	South Korea	ftp://ftp.ncbi.nlm.nih.gov/geo/samples/GSM2236nnn/GSM2236010/suppl/GSM2236010_5445359027_K_Grn.idat.gz	48708
GSM2236011	Public on Mar 20 2018	Jul 14 2016	Mar 20 2018	RNA	1	Human gastric cancer	Homo sapiens	tissue: gastric cancer	age: 64	Sex: male	ptstage: T3	pnstage: N2	death: 1	duration overall survival: 26	total RNA	RecoverAll鈩?total nucleic acid isolation kit (Ambion) or the mirVana RNA Isolation Labeling Kit (Ambion) were used. Quality control was performed with NanoDrop 2000 (Thermo Fischer Scientific) and RNA Nano 6000 chip (Agilent).	biotin	Illumina TotalPrep鈩?RNA Amplification Kit was used for synthesis of labeled cRNA.	9606	HumanHT-12 v3.0 Expression BeadChip array (Illumina) was used.	Standard Illumina scanning protocol	SAMPLE 317	Genomestudio, quantile normalization	GPL6947	Yong-Min,,Huh	Yonsei University	50 Shinchon-ro	Seoul	120-749	South Korea	ftp://ftp.ncbi.nlm.nih.gov/geo/samples/GSM2236nnn/GSM2236011/suppl/GSM2236011_5445359027_L_Grn.idat.gz	48708
GSM2236012	Public on Mar 20 2018	Jul 14 2016	Mar 20 2018	RNA	1	Human gastric cancer	Homo sapiens	tissue: gastric cancer	age: 33	Sex: male	ptstage: T4	pnstage: N3	death: 1	duration overall survival: 3	total RNA	RecoverAll鈩?total nucleic acid isolation kit (Ambion) or the mirVana RNA Isolation Labeling Kit (Ambion) were used. Quality control was performed with NanoDrop 2000 (Thermo Fischer Scientific) and RNA Nano 6000 chip (Agilent).	biotin	Illumina TotalPrep鈩?RNA Amplification Kit was used for synthesis of labeled cRNA.	9606	HumanHT-12 v3.0 Expression BeadChip array (Illumina) was used.	Standard Illumina scanning protocol	SAMPLE 318	Genomestudio, quantile normalization	GPL6947	Yong-Min,,Huh	Yonsei University	50 Shinchon-ro	Seoul	120-749	South Korea	ftp://ftp.ncbi.nlm.nih.gov/geo/samples/GSM2236nnn/GSM2236012/suppl/GSM2236012_5445359031_C_Grn.idat.gz	48708
GSM2236013	Public on Mar 20 2018	Jul 14 2016	Mar 20 2018	RNA	1	Human gastric cancer	Homo sapiens	tissue: gastric cancer	age: 67	Sex: female	ptstage: T2	pnstage: N1	death: 1	duration overall survival: 53	total RNA	RecoverAll鈩?total nucleic acid isolation kit (Ambion) or the mirVana RNA Isolation Labeling Kit (Ambion) were used. Quality control was performed with NanoDrop 2000 (Thermo Fischer Scientific) and RNA Nano 6000 chip (Agilent).	biotin	Illumina TotalPrep鈩?RNA Amplification Kit was used for synthesis of labeled cRNA.	9606	HumanHT-12 v3.0 Expression BeadChip array (Illumina) was used.	Standard Illumina scanning protocol	SAMPLE 319	Genomestudio, quantile normalization	GPL6947	Yong-Min,,Huh	Yonsei University	50 Shinchon-ro	Seoul	120-749	South Korea	ftp://ftp.ncbi.nlm.nih.gov/geo/samples/GSM2236nnn/GSM2236013/suppl/GSM2236013_5445359031_D_Grn.idat.gz	48708
GSM2236014	Public on Mar 20 2018	Jul 14 2016	Mar 20 2018	RNA	1	Human gastric cancer	Homo sapiens	tissue: gastric cancer	age: 68	Sex: male	ptstage: T3	pnstage: N0	death: 1	duration overall survival: 105	total RNA	RecoverAll鈩?total nucleic acid isolation kit (Ambion) or the mirVana RNA Isolation Labeling Kit (Ambion) were used. Quality control was performed with NanoDrop 2000 (Thermo Fischer Scientific) and RNA Nano 6000 chip (Agilent).	biotin	Illumina TotalPrep鈩?RNA Amplification Kit was used for synthesis of labeled cRNA.	9606	HumanHT-12 v3.0 Expression BeadChip array (Illumina) was used.	Standard Illumina scanning protocol	SAMPLE 320	Genomestudio, quantile normalization	GPL6947	Yong-Min,,Huh	Yonsei University	50 Shinchon-ro	Seoul	120-749	South Korea	ftp://ftp.ncbi.nlm.nih.gov/geo/samples/GSM2236nnn/GSM2236014/suppl/GSM2236014_5445359031_E_Grn.idat.gz	48708
GSM2236015	Public on Mar 20 2018	Jul 14 2016	Mar 20 2018	RNA	1	Human gastric cancer	Homo sapiens	tissue: gastric cancer	age: 66	Sex: male	ptstage: T4	pnstage: N2	death: 0	duration overall survival: 110	total RNA	RecoverAll鈩?total nucleic acid isolation kit (Ambion) or the mirVana RNA Isolation Labeling Kit (Ambion) were used. Quality control was performed with NanoDrop 2000 (Thermo Fischer Scientific) and RNA Nano 6000 chip (Agilent).	biotin	Illumina TotalPrep鈩?RNA Amplification Kit was used for synthesis of labeled cRNA.	9606	HumanHT-12 v3.0 Expression BeadChip array (Illumina) was used.	Standard Illumina scanning protocol	SAMPLE 321	Genomestudio, quantile normalization	GPL6947	Yong-Min,,Huh	Yonsei University	50 Shinchon-ro	Seoul	120-749	South Korea	ftp://ftp.ncbi.nlm.nih.gov/geo/samples/GSM2236nnn/GSM2236015/suppl/GSM2236015_5445359031_G_Grn.idat.gz	48708
GSM2236016	Public on Mar 20 2018	Jul 14 2016	Mar 20 2018	RNA	1	Human gastric cancer	Homo sapiens	tissue: gastric cancer	age: 53	Sex: male	ptstage: T4	pnstage: N2	death: 1	duration overall survival: 20	total RNA	RecoverAll鈩?total nucleic acid isolation kit (Ambion) or the mirVana RNA Isolation Labeling Kit (Ambion) were used. Quality control was performed with NanoDrop 2000 (Thermo Fischer Scientific) and RNA Nano 6000 chip (Agilent).	biotin	Illumina TotalPrep鈩?RNA Amplification Kit was used for synthesis of labeled cRNA.	9606	HumanHT-12 v3.0 Expression BeadChip array (Illumina) was used.	Standard Illumina scanning protocol	SAMPLE 322	Genomestudio, quantile normalization	GPL6947	Yong-Min,,Huh	Yonsei University	50 Shinchon-ro	Seoul	120-749	South Korea	ftp://ftp.ncbi.nlm.nih.gov/geo/samples/GSM2236nnn/GSM2236016/suppl/GSM2236016_5445359031_H_Grn.idat.gz	48708
GSM2236017	Public on Mar 20 2018	Jul 14 2016	Mar 20 2018	RNA	1	Human gastric cancer	Homo sapiens	tissue: gastric cancer	age: 61	Sex: male	ptstage: T4	pnstage: N2	death: 1	duration overall survival: 17	total RNA	RecoverAll鈩?total nucleic acid isolation kit (Ambion) or the mirVana RNA Isolation Labeling Kit (Ambion) were used. Quality control was performed with NanoDrop 2000 (Thermo Fischer Scientific) and RNA Nano 6000 chip (Agilent).	biotin	Illumina TotalPrep鈩?RNA Amplification Kit was used for synthesis of labeled cRNA.	9606	HumanHT-12 v3.0 Expression BeadChip array (Illumina) was used.	Standard Illumina scanning protocol	SAMPLE 323	Genomestudio, quantile normalization	GPL6947	Yong-Min,,Huh	Yonsei University	50 Shinchon-ro	Seoul	120-749	South Korea	ftp://ftp.ncbi.nlm.nih.gov/geo/samples/GSM2236nnn/GSM2236017/suppl/GSM2236017_5445359031_J_Grn.idat.gz	48708
GSM2236018	Public on Mar 20 2018	Jul 14 2016	Mar 20 2018	RNA	1	Human gastric cancer	Homo sapiens	tissue: gastric cancer	age: 36	Sex: male	ptstage: T4	pnstage: N2	death: 0	duration overall survival: 116	total RNA	RecoverAll鈩?total nucleic acid isolation kit (Ambion) or the mirVana RNA Isolation Labeling Kit (Ambion) were used. Quality control was performed with NanoDrop 2000 (Thermo Fischer Scientific) and RNA Nano 6000 chip (Agilent).	biotin	Illumina TotalPrep鈩?RNA Amplification Kit was used for synthesis of labeled cRNA.	9606	HumanHT-12 v3.0 Expression BeadChip array (Illumina) was used.	Standard Illumina scanning protocol	SAMPLE 324	Genomestudio, quantile normalization	GPL6947	Yong-Min,,Huh	Yonsei University	50 Shinchon-ro	Seoul	120-749	South Korea	ftp://ftp.ncbi.nlm.nih.gov/geo/samples/GSM2236nnn/GSM2236018/suppl/GSM2236018_5445359031_K_Grn.idat.gz	48708
GSM2236019	Public on Mar 20 2018	Jul 14 2016	Mar 20 2018	RNA	1	Human gastric cancer	Homo sapiens	tissue: gastric cancer	age: 77	Sex: male	ptstage: T3	pnstage: N2	death: 1	duration overall survival: 92	total RNA	RecoverAll鈩?total nucleic acid isolation kit (Ambion) or the mirVana RNA Isolation Labeling Kit (Ambion) were used. Quality control was performed with NanoDrop 2000 (Thermo Fischer Scientific) and RNA Nano 6000 chip (Agilent).	biotin	Illumina TotalPrep鈩?RNA Amplification Kit was used for synthesis of labeled cRNA.	9606	HumanHT-12 v3.0 Expression BeadChip array (Illumina) was used.	Standard Illumina scanning protocol	SAMPLE 325	Genomestudio, quantile normalization	GPL6947	Yong-Min,,Huh	Yonsei University	50 Shinchon-ro	Seoul	120-749	South Korea	ftp://ftp.ncbi.nlm.nih.gov/geo/samples/GSM2236nnn/GSM2236019/suppl/GSM2236019_5445359032_A_Grn.idat.gz	48708
GSM2236020	Public on Mar 20 2018	Jul 14 2016	Mar 20 2018	RNA	1	Human gastric cancer	Homo sapiens	tissue: gastric cancer	age: 70	Sex: female	ptstage: T4	pnstage: N0	death: 0	duration overall survival: 109	total RNA	RecoverAll鈩?total nucleic acid isolation kit (Ambion) or the mirVana RNA Isolation Labeling Kit (Ambion) were used. Quality control was performed with NanoDrop 2000 (Thermo Fischer Scientific) and RNA Nano 6000 chip (Agilent).	biotin	Illumina TotalPrep鈩?RNA Amplification Kit was used for synthesis of labeled cRNA.	9606	HumanHT-12 v3.0 Expression BeadChip array (Illumina) was used.	Standard Illumina scanning protocol	SAMPLE 326	Genomestudio, quantile normalization	GPL6947	Yong-Min,,Huh	Yonsei University	50 Shinchon-ro	Seoul	120-749	South Korea	ftp://ftp.ncbi.nlm.nih.gov/geo/samples/GSM2236nnn/GSM2236020/suppl/GSM2236020_5445359032_D_Grn.idat.gz	48708
GSM2236021	Public on Mar 20 2018	Jul 14 2016	Mar 20 2018	RNA	1	Human gastric cancer	Homo sapiens	tissue: gastric cancer	age: 32	Sex: male	ptstage: T4	pnstage: N3	death: 1	duration overall survival: 51	total RNA	RecoverAll鈩?total nucleic acid isolation kit (Ambion) or the mirVana RNA Isolation Labeling Kit (Ambion) were used. Quality control was performed with NanoDrop 2000 (Thermo Fischer Scientific) and RNA Nano 6000 chip (Agilent).	biotin	Illumina TotalPrep鈩?RNA Amplification Kit was used for synthesis of labeled cRNA.	9606	HumanHT-12 v3.0 Expression BeadChip array (Illumina) was used.	Standard Illumina scanning protocol	SAMPLE 327	Genomestudio, quantile normalization	GPL6947	Yong-Min,,Huh	Yonsei University	50 Shinchon-ro	Seoul	120-749	South Korea	ftp://ftp.ncbi.nlm.nih.gov/geo/samples/GSM2236nnn/GSM2236021/suppl/GSM2236021_5445359032_G_Grn.idat.gz	48708
GSM2236022	Public on Mar 20 2018	Jul 14 2016	Mar 20 2018	RNA	1	Human gastric cancer	Homo sapiens	tissue: gastric cancer	age: 53	Sex: male	ptstage: T4	pnstage: N3	death: 0	duration overall survival: 104	total RNA	RecoverAll鈩?total nucleic acid isolation kit (Ambion) or the mirVana RNA Isolation Labeling Kit (Ambion) were used. Quality control was performed with NanoDrop 2000 (Thermo Fischer Scientific) and RNA Nano 6000 chip (Agilent).	biotin	Illumina TotalPrep鈩?RNA Amplification Kit was used for synthesis of labeled cRNA.	9606	HumanHT-12 v3.0 Expression BeadChip array (Illumina) was used.	Standard Illumina scanning protocol	SAMPLE 328	Genomestudio, quantile normalization	GPL6947	Yong-Min,,Huh	Yonsei University	50 Shinchon-ro	Seoul	120-749	South Korea	ftp://ftp.ncbi.nlm.nih.gov/geo/samples/GSM2236nnn/GSM2236022/suppl/GSM2236022_5445359032_H_Grn.idat.gz	48708
GSM2236023	Public on Mar 20 2018	Jul 14 2016	Mar 20 2018	RNA	1	Human gastric cancer	Homo sapiens	tissue: gastric cancer	age: 61	Sex: female	ptstage: T2	pnstage: N0	death: 0	duration overall survival: 108	total RNA	RecoverAll鈩?total nucleic acid isolation kit (Ambion) or the mirVana RNA Isolation Labeling Kit (Ambion) were used. Quality control was performed with NanoDrop 2000 (Thermo Fischer Scientific) and RNA Nano 6000 chip (Agilent).	biotin	Illumina TotalPrep鈩?RNA Amplification Kit was used for synthesis of labeled cRNA.	9606	HumanHT-12 v3.0 Expression BeadChip array (Illumina) was used.	Standard Illumina scanning protocol	SAMPLE 329	Genomestudio, quantile normalization	GPL6947	Yong-Min,,Huh	Yonsei University	50 Shinchon-ro	Seoul	120-749	South Korea	ftp://ftp.ncbi.nlm.nih.gov/geo/samples/GSM2236nnn/GSM2236023/suppl/GSM2236023_5445359032_K_Grn.idat.gz	48708
GSM2236024	Public on Mar 20 2018	Jul 14 2016	Mar 20 2018	RNA	1	Human gastric cancer	Homo sapiens	tissue: gastric cancer	age: 54	Sex: male	ptstage: T3	pnstage: N1	death: 0	duration overall survival: 103	total RNA	RecoverAll鈩?total nucleic acid isolation kit (Ambion) or the mirVana RNA Isolation Labeling Kit (Ambion) were used. Quality control was performed with NanoDrop 2000 (Thermo Fischer Scientific) and RNA Nano 6000 chip (Agilent).	biotin	Illumina TotalPrep鈩?RNA Amplification Kit was used for synthesis of labeled cRNA.	9606	HumanHT-12 v3.0 Expression BeadChip array (Illumina) was used.	Standard Illumina scanning protocol	SAMPLE 330	Genomestudio, quantile normalization	GPL6947	Yong-Min,,Huh	Yonsei University	50 Shinchon-ro	Seoul	120-749	South Korea	ftp://ftp.ncbi.nlm.nih.gov/geo/samples/GSM2236nnn/GSM2236024/suppl/GSM2236024_5445359032_L_Grn.idat.gz	48708
GSM2236025	Public on Mar 20 2018	Jul 14 2016	Mar 20 2018	RNA	1	Human gastric cancer	Homo sapiens	tissue: gastric cancer	age: 68	Sex: female	ptstage: T3	pnstage: N1	death: 1	duration overall survival: 39	total RNA	RecoverAll鈩?total nucleic acid isolation kit (Ambion) or the mirVana RNA Isolation Labeling Kit (Ambion) were used. Quality control was performed with NanoDrop 2000 (Thermo Fischer Scientific) and RNA Nano 6000 chip (Agilent).	biotin	Illumina TotalPrep鈩?RNA Amplification Kit was used for synthesis of labeled cRNA.	9606	HumanHT-12 v3.0 Expression BeadChip array (Illumina) was used.	Standard Illumina scanning protocol	SAMPLE 331	Genomestudio, quantile normalization	GPL6947	Yong-Min,,Huh	Yonsei University	50 Shinchon-ro	Seoul	120-749	South Korea	ftp://ftp.ncbi.nlm.nih.gov/geo/samples/GSM2236nnn/GSM2236025/suppl/GSM2236025_5445359035_A_Grn.idat.gz	48708
GSM2236026	Public on Mar 20 2018	Jul 14 2016	Mar 20 2018	RNA	1	Human gastric cancer	Homo sapiens	tissue: gastric cancer	age: 65	Sex: male	ptstage: T3	pnstage: N1	death: 1	duration overall survival: 64	total RNA	RecoverAll鈩?total nucleic acid isolation kit (Ambion) or the mirVana RNA Isolation Labeling Kit (Ambion) were used. Quality control was performed with NanoDrop 2000 (Thermo Fischer Scientific) and RNA Nano 6000 chip (Agilent).	biotin	Illumina TotalPrep鈩?RNA Amplification Kit was used for synthesis of labeled cRNA.	9606	HumanHT-12 v3.0 Expression BeadChip array (Illumina) was used.	Standard Illumina scanning protocol	SAMPLE 332	Genomestudio, quantile normalization	GPL6947	Yong-Min,,Huh	Yonsei University	50 Shinchon-ro	Seoul	120-749	South Korea	ftp://ftp.ncbi.nlm.nih.gov/geo/samples/GSM2236nnn/GSM2236026/suppl/GSM2236026_5445359035_B_Grn.idat.gz	48708
GSM2236027	Public on Mar 20 2018	Jul 14 2016	Mar 20 2018	RNA	1	Human gastric cancer	Homo sapiens	tissue: gastric cancer	age: 80	Sex: female	ptstage: T4	pnstage: N1	death: 0	duration overall survival: 124	total RNA	RecoverAll鈩?total nucleic acid isolation kit (Ambion) or the mirVana RNA Isolation Labeling Kit (Ambion) were used. Quality control was performed with NanoDrop 2000 (Thermo Fischer Scientific) and RNA Nano 6000 chip (Agilent).	biotin	Illumina TotalPrep鈩?RNA Amplification Kit was used for synthesis of labeled cRNA.	9606	HumanHT-12 v3.0 Expression BeadChip array (Illumina) was used.	Standard Illumina scanning protocol	SAMPLE 333	Genomestudio, quantile normalization	GPL6947	Yong-Min,,Huh	Yonsei University	50 Shinchon-ro	Seoul	120-749	South Korea	ftp://ftp.ncbi.nlm.nih.gov/geo/samples/GSM2236nnn/GSM2236027/suppl/GSM2236027_5445359035_C_Grn.idat.gz	48708
GSM2236028	Public on Mar 20 2018	Jul 14 2016	Mar 20 2018	RNA	1	Human gastric cancer	Homo sapiens	tissue: gastric cancer	age: 68	Sex: male	ptstage: T3	pnstage: N0	death: 1	duration overall survival: 95	total RNA	RecoverAll鈩?total nucleic acid isolation kit (Ambion) or the mirVana RNA Isolation Labeling Kit (Ambion) were used. Quality control was performed with NanoDrop 2000 (Thermo Fischer Scientific) and RNA Nano 6000 chip (Agilent).	biotin	Illumina TotalPrep鈩?RNA Amplification Kit was used for synthesis of labeled cRNA.	9606	HumanHT-12 v3.0 Expression BeadChip array (Illumina) was used.	Standard Illumina scanning protocol	SAMPLE 334	Genomestudio, quantile normalization	GPL6947	Yong-Min,,Huh	Yonsei University	50 Shinchon-ro	Seoul	120-749	South Korea	ftp://ftp.ncbi.nlm.nih.gov/geo/samples/GSM2236nnn/GSM2236028/suppl/GSM2236028_5445359035_D_Grn.idat.gz	48708
GSM2236029	Public on Mar 20 2018	Jul 14 2016	Mar 20 2018	RNA	1	Human gastric cancer	Homo sapiens	tissue: gastric cancer	age: 44	Sex: male	ptstage: T2	pnstage: N1	death: 0	duration overall survival: 138	total RNA	RecoverAll鈩?total nucleic acid isolation kit (Ambion) or the mirVana RNA Isolation Labeling Kit (Ambion) were used. Quality control was performed with NanoDrop 2000 (Thermo Fischer Scientific) and RNA Nano 6000 chip (Agilent).	biotin	Illumina TotalPrep鈩?RNA Amplification Kit was used for synthesis of labeled cRNA.	9606	HumanHT-12 v3.0 Expression BeadChip array (Illumina) was used.	Standard Illumina scanning protocol	SAMPLE 335	Genomestudio, quantile normalization	GPL6947	Yong-Min,,Huh	Yonsei University	50 Shinchon-ro	Seoul	120-749	South Korea	ftp://ftp.ncbi.nlm.nih.gov/geo/samples/GSM2236nnn/GSM2236029/suppl/GSM2236029_5445359039_C_Grn.idat.gz	48708
GSM2236030	Public on Mar 20 2018	Jul 14 2016	Mar 20 2018	RNA	1	Human gastric cancer	Homo sapiens	tissue: gastric cancer	age: 63	Sex: male	ptstage: T4	pnstage: N0	death: 0	duration overall survival: 138	total RNA	RecoverAll鈩?total nucleic acid isolation kit (Ambion) or the mirVana RNA Isolation Labeling Kit (Ambion) were used. Quality control was performed with NanoDrop 2000 (Thermo Fischer Scientific) and RNA Nano 6000 chip (Agilent).	biotin	Illumina TotalPrep鈩?RNA Amplification Kit was used for synthesis of labeled cRNA.	9606	HumanHT-12 v3.0 Expression BeadChip array (Illumina) was used.	Standard Illumina scanning protocol	SAMPLE 336	Genomestudio, quantile normalization	GPL6947	Yong-Min,,Huh	Yonsei University	50 Shinchon-ro	Seoul	120-749	South Korea	ftp://ftp.ncbi.nlm.nih.gov/geo/samples/GSM2236nnn/GSM2236030/suppl/GSM2236030_5445359039_E_Grn.idat.gz	48708
GSM2236031	Public on Mar 20 2018	Jul 14 2016	Mar 20 2018	RNA	1	Human gastric cancer	Homo sapiens	tissue: gastric cancer	age: 52	Sex: female	ptstage: T4	pnstage: N0	death: 0	duration overall survival: 134	total RNA	RecoverAll鈩?total nucleic acid isolation kit (Ambion) or the mirVana RNA Isolation Labeling Kit (Ambion) were used. Quality control was performed with NanoDrop 2000 (Thermo Fischer Scientific) and RNA Nano 6000 chip (Agilent).	biotin	Illumina TotalPrep鈩?RNA Amplification Kit was used for synthesis of labeled cRNA.	9606	HumanHT-12 v3.0 Expression BeadChip array (Illumina) was used.	Standard Illumina scanning protocol	SAMPLE 337	Genomestudio, quantile normalization	GPL6947	Yong-Min,,Huh	Yonsei University	50 Shinchon-ro	Seoul	120-749	South Korea	ftp://ftp.ncbi.nlm.nih.gov/geo/samples/GSM2236nnn/GSM2236031/suppl/GSM2236031_5445359039_F_Grn.idat.gz	48708
GSM2236032	Public on Mar 20 2018	Jul 14 2016	Mar 20 2018	RNA	1	Human gastric cancer	Homo sapiens	tissue: gastric cancer	age: 44	Sex: male	ptstage: T4	pnstage: N0	death: 0	duration overall survival: 134	total RNA	RecoverAll鈩?total nucleic acid isolation kit (Ambion) or the mirVana RNA Isolation Labeling Kit (Ambion) were used. Quality control was performed with NanoDrop 2000 (Thermo Fischer Scientific) and RNA Nano 6000 chip (Agilent).	biotin	Illumina TotalPrep鈩?RNA Amplification Kit was used for synthesis of labeled cRNA.	9606	HumanHT-12 v3.0 Expression BeadChip array (Illumina) was used.	Standard Illumina scanning protocol	SAMPLE 338	Genomestudio, quantile normalization	GPL6947	Yong-Min,,Huh	Yonsei University	50 Shinchon-ro	Seoul	120-749	South Korea	ftp://ftp.ncbi.nlm.nih.gov/geo/samples/GSM2236nnn/GSM2236032/suppl/GSM2236032_5445359039_G_Grn.idat.gz	48708
GSM2236033	Public on Mar 20 2018	Jul 14 2016	Mar 20 2018	RNA	1	Human gastric cancer	Homo sapiens	tissue: gastric cancer	age: 69	Sex: male	ptstage: T3	pnstage: N0	death: 0	duration overall survival: 120	total RNA	RecoverAll鈩?total nucleic acid isolation kit (Ambion) or the mirVana RNA Isolation Labeling Kit (Ambion) were used. Quality control was performed with NanoDrop 2000 (Thermo Fischer Scientific) and RNA Nano 6000 chip (Agilent).	biotin	Illumina TotalPrep鈩?RNA Amplification Kit was used for synthesis of labeled cRNA.	9606	HumanHT-12 v3.0 Expression BeadChip array (Illumina) was used.	Standard Illumina scanning protocol	SAMPLE 339	Genomestudio, quantile normalization	GPL6947	Yong-Min,,Huh	Yonsei University	50 Shinchon-ro	Seoul	120-749	South Korea	ftp://ftp.ncbi.nlm.nih.gov/geo/samples/GSM2236nnn/GSM2236033/suppl/GSM2236033_5445359039_H_Grn.idat.gz	48708
GSM2236034	Public on Mar 20 2018	Jul 14 2016	Mar 20 2018	RNA	1	Human gastric cancer	Homo sapiens	tissue: gastric cancer	age: 55	Sex: male	ptstage: T4	pnstage: N0	death: 0	duration overall survival: 122	total RNA	RecoverAll鈩?total nucleic acid isolation kit (Ambion) or the mirVana RNA Isolation Labeling Kit (Ambion) were used. Quality control was performed with NanoDrop 2000 (Thermo Fischer Scientific) and RNA Nano 6000 chip (Agilent).	biotin	Illumina TotalPrep鈩?RNA Amplification Kit was used for synthesis of labeled cRNA.	9606	HumanHT-12 v3.0 Expression BeadChip array (Illumina) was used.	Standard Illumina scanning protocol	SAMPLE 340	Genomestudio, quantile normalization	GPL6947	Yong-Min,,Huh	Yonsei University	50 Shinchon-ro	Seoul	120-749	South Korea	ftp://ftp.ncbi.nlm.nih.gov/geo/samples/GSM2236nnn/GSM2236034/suppl/GSM2236034_5445359039_J_Grn.idat.gz	48708
GSM2236036	Public on Mar 20 2018	Jul 14 2016	Mar 20 2018	RNA	1	Human gastric cancer	Homo sapiens	tissue: gastric cancer	age: 62	Sex: male	ptstage: T1	pnstage: N1	death: 0	duration overall survival: 41	total RNA	RecoverAll鈩?total nucleic acid isolation kit (Ambion) or the mirVana RNA Isolation Labeling Kit (Ambion) were used. Quality control was performed with NanoDrop 2000 (Thermo Fischer Scientific) and RNA Nano 6000 chip (Agilent).	biotin	Illumina TotalPrep鈩?RNA Amplification Kit was used for synthesis of labeled cRNA.	9606	HumanHT-12 v3.0 Expression BeadChip array (Illumina) was used.	Standard Illumina scanning protocol	SAMPLE 342	Genomestudio, quantile normalization	GPL6947	Yong-Min,,Huh	Yonsei University	50 Shinchon-ro	Seoul	120-749	South Korea	ftp://ftp.ncbi.nlm.nih.gov/geo/samples/GSM2236nnn/GSM2236036/suppl/GSM2236036_5445359042_B_Grn.idat.gz	48708
GSM2236037	Public on Mar 20 2018	Jul 14 2016	Mar 20 2018	RNA	1	Human gastric cancer	Homo sapiens	tissue: gastric cancer	age: 64	Sex: female	ptstage: T4	pnstage: N1	death: 0	duration overall survival: 41	total RNA	RecoverAll鈩?total nucleic acid isolation kit (Ambion) or the mirVana RNA Isolation Labeling Kit (Ambion) were used. Quality control was performed with NanoDrop 2000 (Thermo Fischer Scientific) and RNA Nano 6000 chip (Agilent).	biotin	Illumina TotalPrep鈩?RNA Amplification Kit was used for synthesis of labeled cRNA.	9606	HumanHT-12 v3.0 Expression BeadChip array (Illumina) was used.	Standard Illumina scanning protocol	SAMPLE 343	Genomestudio, quantile normalization	GPL6947	Yong-Min,,Huh	Yonsei University	50 Shinchon-ro	Seoul	120-749	South Korea	ftp://ftp.ncbi.nlm.nih.gov/geo/samples/GSM2236nnn/GSM2236037/suppl/GSM2236037_5445359042_C_Grn.idat.gz	48708
GSM2236038	Public on Mar 20 2018	Jul 14 2016	Mar 20 2018	RNA	1	Human gastric cancer	Homo sapiens	tissue: gastric cancer	age: 65	Sex: male	ptstage: T4	pnstage: N2	death: 0	duration overall survival: 40	total RNA	RecoverAll鈩?total nucleic acid isolation kit (Ambion) or the mirVana RNA Isolation Labeling Kit (Ambion) were used. Quality control was performed with NanoDrop 2000 (Thermo Fischer Scientific) and RNA Nano 6000 chip (Agilent).	biotin	Illumina TotalPrep鈩?RNA Amplification Kit was used for synthesis of labeled cRNA.	9606	HumanHT-12 v3.0 Expression BeadChip array (Illumina) was used.	Standard Illumina scanning protocol	SAMPLE 344	Genomestudio, quantile normalization	GPL6947	Yong-Min,,Huh	Yonsei University	50 Shinchon-ro	Seoul	120-749	South Korea	ftp://ftp.ncbi.nlm.nih.gov/geo/samples/GSM2236nnn/GSM2236038/suppl/GSM2236038_5445359042_D_Grn.idat.gz	48708
GSM2236039	Public on Mar 20 2018	Jul 14 2016	Mar 20 2018	RNA	1	Human gastric cancer	Homo sapiens	tissue: gastric cancer	age: 56	Sex: male	ptstage: T2	pnstage: N0	death: 0	duration overall survival: 42	total RNA	RecoverAll鈩?total nucleic acid isolation kit (Ambion) or the mirVana RNA Isolation Labeling Kit (Ambion) were used. Quality control was performed with NanoDrop 2000 (Thermo Fischer Scientific) and RNA Nano 6000 chip (Agilent).	biotin	Illumina TotalPrep鈩?RNA Amplification Kit was used for synthesis of labeled cRNA.	9606	HumanHT-12 v3.0 Expression BeadChip array (Illumina) was used.	Standard Illumina scanning protocol	SAMPLE 345	Genomestudio, quantile normalization	GPL6947	Yong-Min,,Huh	Yonsei University	50 Shinchon-ro	Seoul	120-749	South Korea	ftp://ftp.ncbi.nlm.nih.gov/geo/samples/GSM2236nnn/GSM2236039/suppl/GSM2236039_5445359042_E_Grn.idat.gz	48708
GSM2236040	Public on Mar 20 2018	Jul 14 2016	Mar 20 2018	RNA	1	Human gastric cancer	Homo sapiens	tissue: gastric cancer	age: 71	Sex: female	ptstage: T3	pnstage: N1	death: 0	duration overall survival: 37	total RNA	RecoverAll鈩?total nucleic acid isolation kit (Ambion) or the mirVana RNA Isolation Labeling Kit (Ambion) were used. Quality control was performed with NanoDrop 2000 (Thermo Fischer Scientific) and RNA Nano 6000 chip (Agilent).	biotin	Illumina TotalPrep鈩?RNA Amplification Kit was used for synthesis of labeled cRNA.	9606	HumanHT-12 v3.0 Expression BeadChip array (Illumina) was used.	Standard Illumina scanning protocol	SAMPLE 346	Genomestudio, quantile normalization	GPL6947	Yong-Min,,Huh	Yonsei University	50 Shinchon-ro	Seoul	120-749	South Korea	ftp://ftp.ncbi.nlm.nih.gov/geo/samples/GSM2236nnn/GSM2236040/suppl/GSM2236040_5445359042_F_Grn.idat.gz	48708
GSM2236041	Public on Mar 20 2018	Jul 14 2016	Mar 20 2018	RNA	1	Human gastric cancer	Homo sapiens	tissue: gastric cancer	age: 50	Sex: male	ptstage: T4	pnstage: N1	death: 0	duration overall survival: 41	total RNA	RecoverAll鈩?total nucleic acid isolation kit (Ambion) or the mirVana RNA Isolation Labeling Kit (Ambion) were used. Quality control was performed with NanoDrop 2000 (Thermo Fischer Scientific) and RNA Nano 6000 chip (Agilent).	biotin	Illumina TotalPrep鈩?RNA Amplification Kit was used for synthesis of labeled cRNA.	9606	HumanHT-12 v3.0 Expression BeadChip array (Illumina) was used.	Standard Illumina scanning protocol	SAMPLE 347	Genomestudio, quantile normalization	GPL6947	Yong-Min,,Huh	Yonsei University	50 Shinchon-ro	Seoul	120-749	South Korea	ftp://ftp.ncbi.nlm.nih.gov/geo/samples/GSM2236nnn/GSM2236041/suppl/GSM2236041_5445359042_G_Grn.idat.gz	48708
GSM2236042	Public on Mar 20 2018	Jul 14 2016	Mar 20 2018	RNA	1	Human gastric cancer	Homo sapiens	tissue: gastric cancer	age: 69	Sex: female	ptstage: T4	pnstage: N2	death: 0	duration overall survival: 37	total RNA	RecoverAll鈩?total nucleic acid isolation kit (Ambion) or the mirVana RNA Isolation Labeling Kit (Ambion) were used. Quality control was performed with NanoDrop 2000 (Thermo Fischer Scientific) and RNA Nano 6000 chip (Agilent).	biotin	Illumina TotalPrep鈩?RNA Amplification Kit was used for synthesis of labeled cRNA.	9606	HumanHT-12 v3.0 Expression BeadChip array (Illumina) was used.	Standard Illumina scanning protocol	SAMPLE 348	Genomestudio, quantile normalization	GPL6947	Yong-Min,,Huh	Yonsei University	50 Shinchon-ro	Seoul	120-749	South Korea	ftp://ftp.ncbi.nlm.nih.gov/geo/samples/GSM2236nnn/GSM2236042/suppl/GSM2236042_5445359042_H_Grn.idat.gz	48708
GSM2236043	Public on Mar 20 2018	Jul 14 2016	Mar 20 2018	RNA	1	Human gastric cancer	Homo sapiens	tissue: gastric cancer	age: 48	Sex: male	ptstage: T3	pnstage: N1	death: 0	duration overall survival: 40	total RNA	RecoverAll鈩?total nucleic acid isolation kit (Ambion) or the mirVana RNA Isolation Labeling Kit (Ambion) were used. Quality control was performed with NanoDrop 2000 (Thermo Fischer Scientific) and RNA Nano 6000 chip (Agilent).	biotin	Illumina TotalPrep鈩?RNA Amplification Kit was used for synthesis of labeled cRNA.	9606	HumanHT-12 v3.0 Expression BeadChip array (Illumina) was used.	Standard Illumina scanning protocol	SAMPLE 349	Genomestudio, quantile normalization	GPL6947	Yong-Min,,Huh	Yonsei University	50 Shinchon-ro	Seoul	120-749	South Korea	ftp://ftp.ncbi.nlm.nih.gov/geo/samples/GSM2236nnn/GSM2236043/suppl/GSM2236043_5445359042_I_Grn.idat.gz	48708
GSM2236044	Public on Mar 20 2018	Jul 14 2016	Mar 20 2018	RNA	1	Human gastric cancer	Homo sapiens	tissue: gastric cancer	age: 48	Sex: male	ptstage: T2	pnstage: N2	death: 0	duration overall survival: 141	total RNA	RecoverAll鈩?total nucleic acid isolation kit (Ambion) or the mirVana RNA Isolation Labeling Kit (Ambion) were used. Quality control was performed with NanoDrop 2000 (Thermo Fischer Scientific) and RNA Nano 6000 chip (Agilent).	biotin	Illumina TotalPrep鈩?RNA Amplification Kit was used for synthesis of labeled cRNA.	9606	HumanHT-12 v3.0 Expression BeadChip array (Illumina) was used.	Standard Illumina scanning protocol	SAMPLE 350	Genomestudio, quantile normalization	GPL6947	Yong-Min,,Huh	Yonsei University	50 Shinchon-ro	Seoul	120-749	South Korea	ftp://ftp.ncbi.nlm.nih.gov/geo/samples/GSM2236nnn/GSM2236044/suppl/GSM2236044_5445359042_J_Grn.idat.gz	48708
GSM2236045	Public on Mar 20 2018	Jul 14 2016	Mar 20 2018	RNA	1	Human gastric cancer	Homo sapiens	tissue: gastric cancer	age: 63	Sex: male	ptstage: T4	pnstage: N1	death: 0	duration overall survival: 161	total RNA	RecoverAll鈩?total nucleic acid isolation kit (Ambion) or the mirVana RNA Isolation Labeling Kit (Ambion) were used. Quality control was performed with NanoDrop 2000 (Thermo Fischer Scientific) and RNA Nano 6000 chip (Agilent).	biotin	Illumina TotalPrep鈩?RNA Amplification Kit was used for synthesis of labeled cRNA.	9606	HumanHT-12 v3.0 Expression BeadChip array (Illumina) was used.	Standard Illumina scanning protocol	SAMPLE 351	Genomestudio, quantile normalization	GPL6947	Yong-Min,,Huh	Yonsei University	50 Shinchon-ro	Seoul	120-749	South Korea	ftp://ftp.ncbi.nlm.nih.gov/geo/samples/GSM2236nnn/GSM2236045/suppl/GSM2236045_5445359042_K_Grn.idat.gz	48708
GSM2236046	Public on Mar 20 2018	Jul 14 2016	Mar 20 2018	RNA	1	Human gastric cancer	Homo sapiens	tissue: gastric cancer	age: 64	Sex: male	ptstage: T4	pnstage: N1	death: 1	duration overall survival: 35	total RNA	RecoverAll鈩?total nucleic acid isolation kit (Ambion) or the mirVana RNA Isolation Labeling Kit (Ambion) were used. Quality control was performed with NanoDrop 2000 (Thermo Fischer Scientific) and RNA Nano 6000 chip (Agilent).	biotin	Illumina TotalPrep鈩?RNA Amplification Kit was used for synthesis of labeled cRNA.	9606	HumanHT-12 v3.0 Expression BeadChip array (Illumina) was used.	Standard Illumina scanning protocol	SAMPLE 352	Genomestudio, quantile normalization	GPL6947	Yong-Min,,Huh	Yonsei University	50 Shinchon-ro	Seoul	120-749	South Korea	ftp://ftp.ncbi.nlm.nih.gov/geo/samples/GSM2236nnn/GSM2236046/suppl/GSM2236046_5445359042_L_Grn.idat.gz	48708
GSM2236047	Public on Mar 20 2018	Jul 14 2016	Mar 20 2018	RNA	1	Human gastric cancer	Homo sapiens	tissue: gastric cancer	age: 49	Sex: female	ptstage: T4	pnstage: N2	death: 1	duration overall survival: 49	total RNA	RecoverAll鈩?total nucleic acid isolation kit (Ambion) or the mirVana RNA Isolation Labeling Kit (Ambion) were used. Quality control was performed with NanoDrop 2000 (Thermo Fischer Scientific) and RNA Nano 6000 chip (Agilent).	biotin	Illumina TotalPrep鈩?RNA Amplification Kit was used for synthesis of labeled cRNA.	9606	HumanHT-12 v3.0 Expression BeadChip array (Illumina) was used.	Standard Illumina scanning protocol	SAMPLE 353	Genomestudio, quantile normalization	GPL6947	Yong-Min,,Huh	Yonsei University	50 Shinchon-ro	Seoul	120-749	South Korea	ftp://ftp.ncbi.nlm.nih.gov/geo/samples/GSM2236nnn/GSM2236047/suppl/GSM2236047_5447338001_A_Grn.idat.gz	48708
GSM2236048	Public on Mar 20 2018	Jul 14 2016	Mar 20 2018	RNA	1	Human gastric cancer	Homo sapiens	tissue: gastric cancer	age: 64	Sex: male	ptstage: T3	pnstage: N0	death: 0	duration overall survival: 102	total RNA	RecoverAll鈩?total nucleic acid isolation kit (Ambion) or the mirVana RNA Isolation Labeling Kit (Ambion) were used. Quality control was performed with NanoDrop 2000 (Thermo Fischer Scientific) and RNA Nano 6000 chip (Agilent).	biotin	Illumina TotalPrep鈩?RNA Amplification Kit was used for synthesis of labeled cRNA.	9606	HumanHT-12 v3.0 Expression BeadChip array (Illumina) was used.	Standard Illumina scanning protocol	SAMPLE 354	Genomestudio, quantile normalization	GPL6947	Yong-Min,,Huh	Yonsei University	50 Shinchon-ro	Seoul	120-749	South Korea	ftp://ftp.ncbi.nlm.nih.gov/geo/samples/GSM2236nnn/GSM2236048/suppl/GSM2236048_5447338001_D_Grn.idat.gz	48708
GSM2236049	Public on Mar 20 2018	Jul 14 2016	Mar 20 2018	RNA	1	Human gastric cancer	Homo sapiens	tissue: gastric cancer	age: 44	Sex: female	ptstage: T4	pnstage: N1	death: 1	duration overall survival: 33	total RNA	RecoverAll鈩?total nucleic acid isolation kit (Ambion) or the mirVana RNA Isolation Labeling Kit (Ambion) were used. Quality control was performed with NanoDrop 2000 (Thermo Fischer Scientific) and RNA Nano 6000 chip (Agilent).	biotin	Illumina TotalPrep鈩?RNA Amplification Kit was used for synthesis of labeled cRNA.	9606	HumanHT-12 v3.0 Expression BeadChip array (Illumina) was used.	Standard Illumina scanning protocol	SAMPLE 355	Genomestudio, quantile normalization	GPL6947	Yong-Min,,Huh	Yonsei University	50 Shinchon-ro	Seoul	120-749	South Korea	ftp://ftp.ncbi.nlm.nih.gov/geo/samples/GSM2236nnn/GSM2236049/suppl/GSM2236049_5447338001_F_Grn.idat.gz	48708
GSM2236050	Public on Mar 20 2018	Jul 14 2016	Mar 20 2018	RNA	1	Human gastric cancer	Homo sapiens	tissue: gastric cancer	age: 65	Sex: male	ptstage: T3	pnstage: N1	death: 0	duration overall survival: 101	total RNA	RecoverAll鈩?total nucleic acid isolation kit (Ambion) or the mirVana RNA Isolation Labeling Kit (Ambion) were used. Quality control was performed with NanoDrop 2000 (Thermo Fischer Scientific) and RNA Nano 6000 chip (Agilent).	biotin	Illumina TotalPrep鈩?RNA Amplification Kit was used for synthesis of labeled cRNA.	9606	HumanHT-12 v3.0 Expression BeadChip array (Illumina) was used.	Standard Illumina scanning protocol	SAMPLE 356	Genomestudio, quantile normalization	GPL6947	Yong-Min,,Huh	Yonsei University	50 Shinchon-ro	Seoul	120-749	South Korea	ftp://ftp.ncbi.nlm.nih.gov/geo/samples/GSM2236nnn/GSM2236050/suppl/GSM2236050_5447338001_G_Grn.idat.gz	48708
GSM2236051	Public on Mar 20 2018	Jul 14 2016	Mar 20 2018	RNA	1	Human gastric cancer	Homo sapiens	tissue: gastric cancer	age: 34	Sex: male	ptstage: T4	pnstage: N2	death: 1	duration overall survival: 38	total RNA	RecoverAll鈩?total nucleic acid isolation kit (Ambion) or the mirVana RNA Isolation Labeling Kit (Ambion) were used. Quality control was performed with NanoDrop 2000 (Thermo Fischer Scientific) and RNA Nano 6000 chip (Agilent).	biotin	Illumina TotalPrep鈩?RNA Amplification Kit was used for synthesis of labeled cRNA.	9606	HumanHT-12 v3.0 Expression BeadChip array (Illumina) was used.	Standard Illumina scanning protocol	SAMPLE 357	Genomestudio, quantile normalization	GPL6947	Yong-Min,,Huh	Yonsei University	50 Shinchon-ro	Seoul	120-749	South Korea	ftp://ftp.ncbi.nlm.nih.gov/geo/samples/GSM2236nnn/GSM2236051/suppl/GSM2236051_5447338001_H_Grn.idat.gz	48708
GSM2236052	Public on Mar 20 2018	Jul 14 2016	Mar 20 2018	RNA	1	Human gastric cancer	Homo sapiens	tissue: gastric cancer	age: 61	Sex: male	ptstage: T4	pnstage: N1	death: 0	duration overall survival: 116	total RNA	RecoverAll鈩?total nucleic acid isolation kit (Ambion) or the mirVana RNA Isolation Labeling Kit (Ambion) were used. Quality control was performed with NanoDrop 2000 (Thermo Fischer Scientific) and RNA Nano 6000 chip (Agilent).	biotin	Illumina TotalPrep鈩?RNA Amplification Kit was used for synthesis of labeled cRNA.	9606	HumanHT-12 v3.0 Expression BeadChip array (Illumina) was used.	Standard Illumina scanning protocol	SAMPLE 358	Genomestudio, quantile normalization	GPL6947	Yong-Min,,Huh	Yonsei University	50 Shinchon-ro	Seoul	120-749	South Korea	ftp://ftp.ncbi.nlm.nih.gov/geo/samples/GSM2236nnn/GSM2236052/suppl/GSM2236052_5447338001_J_Grn.idat.gz	48708
GSM2236053	Public on Mar 20 2018	Jul 14 2016	Mar 20 2018	RNA	1	Human gastric cancer	Homo sapiens	tissue: gastric cancer	age: 41	Sex: female	ptstage: T4	pnstage: N2	death: 1	duration overall survival: 22	total RNA	RecoverAll鈩?total nucleic acid isolation kit (Ambion) or the mirVana RNA Isolation Labeling Kit (Ambion) were used. Quality control was performed with NanoDrop 2000 (Thermo Fischer Scientific) and RNA Nano 6000 chip (Agilent).	biotin	Illumina TotalPrep鈩?RNA Amplification Kit was used for synthesis of labeled cRNA.	9606	HumanHT-12 v3.0 Expression BeadChip array (Illumina) was used.	Standard Illumina scanning protocol	SAMPLE 359	Genomestudio, quantile normalization	GPL6947	Yong-Min,,Huh	Yonsei University	50 Shinchon-ro	Seoul	120-749	South Korea	ftp://ftp.ncbi.nlm.nih.gov/geo/samples/GSM2236nnn/GSM2236053/suppl/GSM2236053_5447338001_L_Grn.idat.gz	48708
GSM2236054	Public on Mar 20 2018	Jul 14 2016	Mar 20 2018	RNA	1	Human gastric cancer	Homo sapiens	tissue: gastric cancer	age: 49	Sex: female	ptstage: T4	pnstage: N0	death: 1	duration overall survival: 79	total RNA	RecoverAll鈩?total nucleic acid isolation kit (Ambion) or the mirVana RNA Isolation Labeling Kit (Ambion) were used. Quality control was performed with NanoDrop 2000 (Thermo Fischer Scientific) and RNA Nano 6000 chip (Agilent).	biotin	Illumina TotalPrep鈩?RNA Amplification Kit was used for synthesis of labeled cRNA.	9606	HumanHT-12 v3.0 Expression BeadChip array (Illumina) was used.	Standard Illumina scanning protocol	SAMPLE 360	Genomestudio, quantile normalization	GPL6947	Yong-Min,,Huh	Yonsei University	50 Shinchon-ro	Seoul	120-749	South Korea	ftp://ftp.ncbi.nlm.nih.gov/geo/samples/GSM2236nnn/GSM2236054/suppl/GSM2236054_5447338003_A_Grn.idat.gz	48708
GSM2236055	Public on Mar 20 2018	Jul 14 2016	Mar 20 2018	RNA	1	Human gastric cancer	Homo sapiens	tissue: gastric cancer	age: 55	Sex: male	ptstage: T4	pnstage: N0	death: 0	duration overall survival: 133	total RNA	RecoverAll鈩?total nucleic acid isolation kit (Ambion) or the mirVana RNA Isolation Labeling Kit (Ambion) were used. Quality control was performed with NanoDrop 2000 (Thermo Fischer Scientific) and RNA Nano 6000 chip (Agilent).	biotin	Illumina TotalPrep鈩?RNA Amplification Kit was used for synthesis of labeled cRNA.	9606	HumanHT-12 v3.0 Expression BeadChip array (Illumina) was used.	Standard Illumina scanning protocol	SAMPLE 361	Genomestudio, quantile normalization	GPL6947	Yong-Min,,Huh	Yonsei University	50 Shinchon-ro	Seoul	120-749	South Korea	ftp://ftp.ncbi.nlm.nih.gov/geo/samples/GSM2236nnn/GSM2236055/suppl/GSM2236055_5447338003_C_Grn.idat.gz	48708
GSM2236056	Public on Mar 20 2018	Jul 14 2016	Mar 20 2018	RNA	1	Human gastric cancer	Homo sapiens	tissue: gastric cancer	age: 54	Sex: male	ptstage: T4	pnstage: N0	death: 0	duration overall survival: 128	total RNA	RecoverAll鈩?total nucleic acid isolation kit (Ambion) or the mirVana RNA Isolation Labeling Kit (Ambion) were used. Quality control was performed with NanoDrop 2000 (Thermo Fischer Scientific) and RNA Nano 6000 chip (Agilent).	biotin	Illumina TotalPrep鈩?RNA Amplification Kit was used for synthesis of labeled cRNA.	9606	HumanHT-12 v3.0 Expression BeadChip array (Illumina) was used.	Standard Illumina scanning protocol	SAMPLE 362	Genomestudio, quantile normalization	GPL6947	Yong-Min,,Huh	Yonsei University	50 Shinchon-ro	Seoul	120-749	South Korea	ftp://ftp.ncbi.nlm.nih.gov/geo/samples/GSM2236nnn/GSM2236056/suppl/GSM2236056_5447338003_D_Grn.idat.gz	48708
GSM2236057	Public on Mar 20 2018	Jul 14 2016	Mar 20 2018	RNA	1	Human gastric cancer	Homo sapiens	tissue: gastric cancer	age: 62	Sex: male	ptstage: T2	pnstage: N1	death: 1	duration overall survival: 37	total RNA	RecoverAll鈩?total nucleic acid isolation kit (Ambion) or the mirVana RNA Isolation Labeling Kit (Ambion) were used. Quality control was performed with NanoDrop 2000 (Thermo Fischer Scientific) and RNA Nano 6000 chip (Agilent).	biotin	Illumina TotalPrep鈩?RNA Amplification Kit was used for synthesis of labeled cRNA.	9606	HumanHT-12 v3.0 Expression BeadChip array (Illumina) was used.	Standard Illumina scanning protocol	SAMPLE 363	Genomestudio, quantile normalization	GPL6947	Yong-Min,,Huh	Yonsei University	50 Shinchon-ro	Seoul	120-749	South Korea	ftp://ftp.ncbi.nlm.nih.gov/geo/samples/GSM2236nnn/GSM2236057/suppl/GSM2236057_5447338003_E_Grn.idat.gz	48708
GSM2236058	Public on Mar 20 2018	Jul 14 2016	Mar 20 2018	RNA	1	Human gastric cancer	Homo sapiens	tissue: gastric cancer	age: 62	Sex: male	ptstage: T2	pnstage: N1	death: 0	duration overall survival: 136	total RNA	RecoverAll鈩?total nucleic acid isolation kit (Ambion) or the mirVana RNA Isolation Labeling Kit (Ambion) were used. Quality control was performed with NanoDrop 2000 (Thermo Fischer Scientific) and RNA Nano 6000 chip (Agilent).	biotin	Illumina TotalPrep鈩?RNA Amplification Kit was used for synthesis of labeled cRNA.	9606	HumanHT-12 v3.0 Expression BeadChip array (Illumina) was used.	Standard Illumina scanning protocol	SAMPLE 364	Genomestudio, quantile normalization	GPL6947	Yong-Min,,Huh	Yonsei University	50 Shinchon-ro	Seoul	120-749	South Korea	ftp://ftp.ncbi.nlm.nih.gov/geo/samples/GSM2236nnn/GSM2236058/suppl/GSM2236058_5447338003_F_Grn.idat.gz	48708
GSM2236059	Public on Mar 20 2018	Jul 14 2016	Mar 20 2018	RNA	1	Human gastric cancer	Homo sapiens	tissue: gastric cancer	age: 75	Sex: female	ptstage: T2	pnstage: N1	death: 0	duration overall survival: 137	total RNA	RecoverAll鈩?total nucleic acid isolation kit (Ambion) or the mirVana RNA Isolation Labeling Kit (Ambion) were used. Quality control was performed with NanoDrop 2000 (Thermo Fischer Scientific) and RNA Nano 6000 chip (Agilent).	biotin	Illumina TotalPrep鈩?RNA Amplification Kit was used for synthesis of labeled cRNA.	9606	HumanHT-12 v3.0 Expression BeadChip array (Illumina) was used.	Standard Illumina scanning protocol	SAMPLE 365	Genomestudio, quantile normalization	GPL6947	Yong-Min,,Huh	Yonsei University	50 Shinchon-ro	Seoul	120-749	South Korea	ftp://ftp.ncbi.nlm.nih.gov/geo/samples/GSM2236nnn/GSM2236059/suppl/GSM2236059_5447338003_G_Grn.idat.gz	48708
GSM2236060	Public on Mar 20 2018	Jul 14 2016	Mar 20 2018	RNA	1	Human gastric cancer	Homo sapiens	tissue: gastric cancer	age: 47	Sex: male	ptstage: T4	pnstage: N3	death: 1	duration overall survival: 37	total RNA	RecoverAll鈩?total nucleic acid isolation kit (Ambion) or the mirVana RNA Isolation Labeling Kit (Ambion) were used. Quality control was performed with NanoDrop 2000 (Thermo Fischer Scientific) and RNA Nano 6000 chip (Agilent).	biotin	Illumina TotalPrep鈩?RNA Amplification Kit was used for synthesis of labeled cRNA.	9606	HumanHT-12 v3.0 Expression BeadChip array (Illumina) was used.	Standard Illumina scanning protocol	SAMPLE 366	Genomestudio, quantile normalization	GPL6947	Yong-Min,,Huh	Yonsei University	50 Shinchon-ro	Seoul	120-749	South Korea	ftp://ftp.ncbi.nlm.nih.gov/geo/samples/GSM2236nnn/GSM2236060/suppl/GSM2236060_5447338003_H_Grn.idat.gz	48708
GSM2236061	Public on Mar 20 2018	Jul 14 2016	Mar 20 2018	RNA	1	Human gastric cancer	Homo sapiens	tissue: gastric cancer	age: 68	Sex: female	ptstage: T2	pnstage: N1	death: 0	duration overall survival: 129	total RNA	RecoverAll鈩?total nucleic acid isolation kit (Ambion) or the mirVana RNA Isolation Labeling Kit (Ambion) were used. Quality control was performed with NanoDrop 2000 (Thermo Fischer Scientific) and RNA Nano 6000 chip (Agilent).	biotin	Illumina TotalPrep鈩?RNA Amplification Kit was used for synthesis of labeled cRNA.	9606	HumanHT-12 v3.0 Expression BeadChip array (Illumina) was used.	Standard Illumina scanning protocol	SAMPLE 367	Genomestudio, quantile normalization	GPL6947	Yong-Min,,Huh	Yonsei University	50 Shinchon-ro	Seoul	120-749	South Korea	ftp://ftp.ncbi.nlm.nih.gov/geo/samples/GSM2236nnn/GSM2236061/suppl/GSM2236061_5447338003_I_Grn.idat.gz	48708
GSM2236062	Public on Mar 20 2018	Jul 14 2016	Mar 20 2018	RNA	1	Human gastric cancer	Homo sapiens	tissue: gastric cancer	age: 69	Sex: male	ptstage: T3	pnstage: N1	death: 0	duration overall survival: 129	total RNA	RecoverAll鈩?total nucleic acid isolation kit (Ambion) or the mirVana RNA Isolation Labeling Kit (Ambion) were used. Quality control was performed with NanoDrop 2000 (Thermo Fischer Scientific) and RNA Nano 6000 chip (Agilent).	biotin	Illumina TotalPrep鈩?RNA Amplification Kit was used for synthesis of labeled cRNA.	9606	HumanHT-12 v3.0 Expression BeadChip array (Illumina) was used.	Standard Illumina scanning protocol	SAMPLE 368	Genomestudio, quantile normalization	GPL6947	Yong-Min,,Huh	Yonsei University	50 Shinchon-ro	Seoul	120-749	South Korea	ftp://ftp.ncbi.nlm.nih.gov/geo/samples/GSM2236nnn/GSM2236062/suppl/GSM2236062_5447338003_J_Grn.idat.gz	48708
GSM2236063	Public on Mar 20 2018	Jul 14 2016	Mar 20 2018	RNA	1	Human gastric cancer	Homo sapiens	tissue: gastric cancer	age: 48	Sex: female	ptstage: T2	pnstage: N1	death: 0	duration overall survival: 131	total RNA	RecoverAll鈩?total nucleic acid isolation kit (Ambion) or the mirVana RNA Isolation Labeling Kit (Ambion) were used. Quality control was performed with NanoDrop 2000 (Thermo Fischer Scientific) and RNA Nano 6000 chip (Agilent).	biotin	Illumina TotalPrep鈩?RNA Amplification Kit was used for synthesis of labeled cRNA.	9606	HumanHT-12 v3.0 Expression BeadChip array (Illumina) was used.	Standard Illumina scanning protocol	SAMPLE 369	Genomestudio, quantile normalization	GPL6947	Yong-Min,,Huh	Yonsei University	50 Shinchon-ro	Seoul	120-749	South Korea	ftp://ftp.ncbi.nlm.nih.gov/geo/samples/GSM2236nnn/GSM2236063/suppl/GSM2236063_5447338003_K_Grn.idat.gz	48708
GSM2236064	Public on Mar 20 2018	Jul 14 2016	Mar 20 2018	RNA	1	Human gastric cancer	Homo sapiens	tissue: gastric cancer	age: 70	Sex: male	ptstage: T4	pnstage: N0	death: 1	duration overall survival: 77	total RNA	RecoverAll鈩?total nucleic acid isolation kit (Ambion) or the mirVana RNA Isolation Labeling Kit (Ambion) were used. Quality control was performed with NanoDrop 2000 (Thermo Fischer Scientific) and RNA Nano 6000 chip (Agilent).	biotin	Illumina TotalPrep鈩?RNA Amplification Kit was used for synthesis of labeled cRNA.	9606	HumanHT-12 v3.0 Expression BeadChip array (Illumina) was used.	Standard Illumina scanning protocol	SAMPLE 370	Genomestudio, quantile normalization	GPL6947	Yong-Min,,Huh	Yonsei University	50 Shinchon-ro	Seoul	120-749	South Korea	ftp://ftp.ncbi.nlm.nih.gov/geo/samples/GSM2236nnn/GSM2236064/suppl/GSM2236064_5447338003_L_Grn.idat.gz	48708
GSM2236065	Public on Mar 20 2018	Jul 14 2016	Mar 20 2018	RNA	1	Human gastric cancer	Homo sapiens	tissue: gastric cancer	age: 58	Sex: male	ptstage: T4	pnstage: N2	death: 0	duration overall survival: 119	total RNA	RecoverAll鈩?total nucleic acid isolation kit (Ambion) or the mirVana RNA Isolation Labeling Kit (Ambion) were used. Quality control was performed with NanoDrop 2000 (Thermo Fischer Scientific) and RNA Nano 6000 chip (Agilent).	biotin	Illumina TotalPrep鈩?RNA Amplification Kit was used for synthesis of labeled cRNA.	9606	HumanHT-12 v3.0 Expression BeadChip array (Illumina) was used.	Standard Illumina scanning protocol	SAMPLE 371	Genomestudio, quantile normalization	GPL6947	Yong-Min,,Huh	Yonsei University	50 Shinchon-ro	Seoul	120-749	South Korea	ftp://ftp.ncbi.nlm.nih.gov/geo/samples/GSM2236nnn/GSM2236065/suppl/GSM2236065_5447338018_A_Grn.idat.gz	48708
GSM2236066	Public on Mar 20 2018	Jul 14 2016	Mar 20 2018	RNA	1	Human gastric cancer	Homo sapiens	tissue: gastric cancer	age: 63	Sex: female	ptstage: T4	pnstage: N1	death: 0	duration overall survival: 127	total RNA	RecoverAll鈩?total nucleic acid isolation kit (Ambion) or the mirVana RNA Isolation Labeling Kit (Ambion) were used. Quality control was performed with NanoDrop 2000 (Thermo Fischer Scientific) and RNA Nano 6000 chip (Agilent).	biotin	Illumina TotalPrep鈩?RNA Amplification Kit was used for synthesis of labeled cRNA.	9606	HumanHT-12 v3.0 Expression BeadChip array (Illumina) was used.	Standard Illumina scanning protocol	SAMPLE 372	Genomestudio, quantile normalization	GPL6947	Yong-Min,,Huh	Yonsei University	50 Shinchon-ro	Seoul	120-749	South Korea	ftp://ftp.ncbi.nlm.nih.gov/geo/samples/GSM2236nnn/GSM2236066/suppl/GSM2236066_5447338018_B_Grn.idat.gz	48708
GSM2236067	Public on Mar 20 2018	Jul 14 2016	Mar 20 2018	RNA	1	Human gastric cancer	Homo sapiens	tissue: gastric cancer	age: 47	Sex: male	ptstage: T4	pnstage: N2	death: 1	duration overall survival: 17	total RNA	RecoverAll鈩?total nucleic acid isolation kit (Ambion) or the mirVana RNA Isolation Labeling Kit (Ambion) were used. Quality control was performed with NanoDrop 2000 (Thermo Fischer Scientific) and RNA Nano 6000 chip (Agilent).	biotin	Illumina TotalPrep鈩?RNA Amplification Kit was used for synthesis of labeled cRNA.	9606	HumanHT-12 v3.0 Expression BeadChip array (Illumina) was used.	Standard Illumina scanning protocol	SAMPLE 373	Genomestudio, quantile normalization	GPL6947	Yong-Min,,Huh	Yonsei University	50 Shinchon-ro	Seoul	120-749	South Korea	ftp://ftp.ncbi.nlm.nih.gov/geo/samples/GSM2236nnn/GSM2236067/suppl/GSM2236067_5447338018_C_Grn.idat.gz	48708
GSM2236068	Public on Mar 20 2018	Jul 14 2016	Mar 20 2018	RNA	1	Human gastric cancer	Homo sapiens	tissue: gastric cancer	age: 44	Sex: male	ptstage: T4	pnstage: N0	death: 1	duration overall survival: 42	total RNA	RecoverAll鈩?total nucleic acid isolation kit (Ambion) or the mirVana RNA Isolation Labeling Kit (Ambion) were used. Quality control was performed with NanoDrop 2000 (Thermo Fischer Scientific) and RNA Nano 6000 chip (Agilent).	biotin	Illumina TotalPrep鈩?RNA Amplification Kit was used for synthesis of labeled cRNA.	9606	HumanHT-12 v3.0 Expression BeadChip array (Illumina) was used.	Standard Illumina scanning protocol	SAMPLE 374	Genomestudio, quantile normalization	GPL6947	Yong-Min,,Huh	Yonsei University	50 Shinchon-ro	Seoul	120-749	South Korea	ftp://ftp.ncbi.nlm.nih.gov/geo/samples/GSM2236nnn/GSM2236068/suppl/GSM2236068_5447338018_E_Grn.idat.gz	48708
GSM2236069	Public on Mar 20 2018	Jul 14 2016	Mar 20 2018	RNA	1	Human gastric cancer	Homo sapiens	tissue: gastric cancer	age: 69	Sex: male	ptstage: T3	pnstage: N1	death: 0	duration overall survival: 115	total RNA	RecoverAll鈩?total nucleic acid isolation kit (Ambion) or the mirVana RNA Isolation Labeling Kit (Ambion) were used. Quality control was performed with NanoDrop 2000 (Thermo Fischer Scientific) and RNA Nano 6000 chip (Agilent).	biotin	Illumina TotalPrep鈩?RNA Amplification Kit was used for synthesis of labeled cRNA.	9606	HumanHT-12 v3.0 Expression BeadChip array (Illumina) was used.	Standard Illumina scanning protocol	SAMPLE 375	Genomestudio, quantile normalization	GPL6947	Yong-Min,,Huh	Yonsei University	50 Shinchon-ro	Seoul	120-749	South Korea	ftp://ftp.ncbi.nlm.nih.gov/geo/samples/GSM2236nnn/GSM2236069/suppl/GSM2236069_5447338018_F_Grn.idat.gz	48708
GSM2236070	Public on Mar 20 2018	Jul 14 2016	Mar 20 2018	RNA	1	Human gastric cancer	Homo sapiens	tissue: gastric cancer	age: 71	Sex: male	ptstage: T3	pnstage: N1	death: 0	duration overall survival: 124	total RNA	RecoverAll鈩?total nucleic acid isolation kit (Ambion) or the mirVana RNA Isolation Labeling Kit (Ambion) were used. Quality control was performed with NanoDrop 2000 (Thermo Fischer Scientific) and RNA Nano 6000 chip (Agilent).	biotin	Illumina TotalPrep鈩?RNA Amplification Kit was used for synthesis of labeled cRNA.	9606	HumanHT-12 v3.0 Expression BeadChip array (Illumina) was used.	Standard Illumina scanning protocol	SAMPLE 376	Genomestudio, quantile normalization	GPL6947	Yong-Min,,Huh	Yonsei University	50 Shinchon-ro	Seoul	120-749	South Korea	ftp://ftp.ncbi.nlm.nih.gov/geo/samples/GSM2236nnn/GSM2236070/suppl/GSM2236070_5447338018_H_Grn.idat.gz	48708
GSM2236071	Public on Mar 20 2018	Jul 14 2016	Mar 20 2018	RNA	1	Human gastric cancer	Homo sapiens	tissue: gastric cancer	age: 54	Sex: female	ptstage: T4	pnstage: N1	death: 0	duration overall survival: 114	total RNA	RecoverAll鈩?total nucleic acid isolation kit (Ambion) or the mirVana RNA Isolation Labeling Kit (Ambion) were used. Quality control was performed with NanoDrop 2000 (Thermo Fischer Scientific) and RNA Nano 6000 chip (Agilent).	biotin	Illumina TotalPrep鈩?RNA Amplification Kit was used for synthesis of labeled cRNA.	9606	HumanHT-12 v3.0 Expression BeadChip array (Illumina) was used.	Standard Illumina scanning protocol	SAMPLE 377	Genomestudio, quantile normalization	GPL6947	Yong-Min,,Huh	Yonsei University	50 Shinchon-ro	Seoul	120-749	South Korea	ftp://ftp.ncbi.nlm.nih.gov/geo/samples/GSM2236nnn/GSM2236071/suppl/GSM2236071_5447338018_K_Grn.idat.gz	48708
GSM2236072	Public on Mar 20 2018	Jul 14 2016	Mar 20 2018	RNA	1	Human gastric cancer	Homo sapiens	tissue: gastric cancer	age: 49	Sex: male	ptstage: T3	pnstage: N3	death: 1	duration overall survival: 33	total RNA	RecoverAll鈩?total nucleic acid isolation kit (Ambion) or the mirVana RNA Isolation Labeling Kit (Ambion) were used. Quality control was performed with NanoDrop 2000 (Thermo Fischer Scientific) and RNA Nano 6000 chip (Agilent).	biotin	Illumina TotalPrep鈩?RNA Amplification Kit was used for synthesis of labeled cRNA.	9606	HumanHT-12 v3.0 Expression BeadChip array (Illumina) was used.	Standard Illumina scanning protocol	SAMPLE 378	Genomestudio, quantile normalization	GPL6947	Yong-Min,,Huh	Yonsei University	50 Shinchon-ro	Seoul	120-749	South Korea	ftp://ftp.ncbi.nlm.nih.gov/geo/samples/GSM2236nnn/GSM2236072/suppl/GSM2236072_5447338018_L_Grn.idat.gz	48708
GSM2236073	Public on Mar 20 2018	Jul 14 2016	Mar 20 2018	RNA	1	Human gastric cancer	Homo sapiens	tissue: gastric cancer	age: 60	Sex: male	ptstage: T4	pnstage: N2	death: 1	duration overall survival: 22	total RNA	RecoverAll鈩?total nucleic acid isolation kit (Ambion) or the mirVana RNA Isolation Labeling Kit (Ambion) were used. Quality control was performed with NanoDrop 2000 (Thermo Fischer Scientific) and RNA Nano 6000 chip (Agilent).	biotin	Illumina TotalPrep鈩?RNA Amplification Kit was used for synthesis of labeled cRNA.	9606	HumanHT-12 v3.0 Expression BeadChip array (Illumina) was used.	Standard Illumina scanning protocol	SAMPLE 379	Genomestudio, quantile normalization	GPL6947	Yong-Min,,Huh	Yonsei University	50 Shinchon-ro	Seoul	120-749	South Korea	ftp://ftp.ncbi.nlm.nih.gov/geo/samples/GSM2236nnn/GSM2236073/suppl/GSM2236073_5447338020_A_Grn.idat.gz	48708
GSM2236074	Public on Mar 20 2018	Jul 14 2016	Mar 20 2018	RNA	1	Human gastric cancer	Homo sapiens	tissue: gastric cancer	age: 62	Sex: male	ptstage: T2	pnstage: N1	death: 0	duration overall survival: 143	total RNA	RecoverAll鈩?total nucleic acid isolation kit (Ambion) or the mirVana RNA Isolation Labeling Kit (Ambion) were used. Quality control was performed with NanoDrop 2000 (Thermo Fischer Scientific) and RNA Nano 6000 chip (Agilent).	biotin	Illumina TotalPrep鈩?RNA Amplification Kit was used for synthesis of labeled cRNA.	9606	HumanHT-12 v3.0 Expression BeadChip array (Illumina) was used.	Standard Illumina scanning protocol	SAMPLE 380	Genomestudio, quantile normalization	GPL6947	Yong-Min,,Huh	Yonsei University	50 Shinchon-ro	Seoul	120-749	South Korea	ftp://ftp.ncbi.nlm.nih.gov/geo/samples/GSM2236nnn/GSM2236074/suppl/GSM2236074_5447338020_B_Grn.idat.gz	48708
GSM2236075	Public on Mar 20 2018	Jul 14 2016	Mar 20 2018	RNA	1	Human gastric cancer	Homo sapiens	tissue: gastric cancer	age: 44	Sex: male	ptstage: T4	pnstage: N1	death: 1	duration overall survival: 39	total RNA	RecoverAll鈩?total nucleic acid isolation kit (Ambion) or the mirVana RNA Isolation Labeling Kit (Ambion) were used. Quality control was performed with NanoDrop 2000 (Thermo Fischer Scientific) and RNA Nano 6000 chip (Agilent).	biotin	Illumina TotalPrep鈩?RNA Amplification Kit was used for synthesis of labeled cRNA.	9606	HumanHT-12 v3.0 Expression BeadChip array (Illumina) was used.	Standard Illumina scanning protocol	SAMPLE 381	Genomestudio, quantile normalization	GPL6947	Yong-Min,,Huh	Yonsei University	50 Shinchon-ro	Seoul	120-749	South Korea	ftp://ftp.ncbi.nlm.nih.gov/geo/samples/GSM2236nnn/GSM2236075/suppl/GSM2236075_5447338020_D_Grn.idat.gz	48708
GSM2236076	Public on Mar 20 2018	Jul 14 2016	Mar 20 2018	RNA	1	Human gastric cancer	Homo sapiens	tissue: gastric cancer	age: 63	Sex: male	ptstage: T3	pnstage: N1	death: 0	duration overall survival: 35	total RNA	RecoverAll鈩?total nucleic acid isolation kit (Ambion) or the mirVana RNA Isolation Labeling Kit (Ambion) were used. Quality control was performed with NanoDrop 2000 (Thermo Fischer Scientific) and RNA Nano 6000 chip (Agilent).	biotin	Illumina TotalPrep鈩?RNA Amplification Kit was used for synthesis of labeled cRNA.	9606	HumanHT-12 v3.0 Expression BeadChip array (Illumina) was used.	Standard Illumina scanning protocol	SAMPLE 382	Genomestudio, quantile normalization	GPL6947	Yong-Min,,Huh	Yonsei University	50 Shinchon-ro	Seoul	120-749	South Korea	ftp://ftp.ncbi.nlm.nih.gov/geo/samples/GSM2236nnn/GSM2236076/suppl/GSM2236076_5447338020_E_Grn.idat.gz	48708
GSM2236077	Public on Mar 20 2018	Jul 14 2016	Mar 20 2018	RNA	1	Human gastric cancer	Homo sapiens	tissue: gastric cancer	age: 68	Sex: male	ptstage: T4	pnstage: N2	death: 0	duration overall survival: 38	total RNA	RecoverAll鈩?total nucleic acid isolation kit (Ambion) or the mirVana RNA Isolation Labeling Kit (Ambion) were used. Quality control was performed with NanoDrop 2000 (Thermo Fischer Scientific) and RNA Nano 6000 chip (Agilent).	biotin	Illumina TotalPrep鈩?RNA Amplification Kit was used for synthesis of labeled cRNA.	9606	HumanHT-12 v3.0 Expression BeadChip array (Illumina) was used.	Standard Illumina scanning protocol	SAMPLE 383	Genomestudio, quantile normalization	GPL6947	Yong-Min,,Huh	Yonsei University	50 Shinchon-ro	Seoul	120-749	South Korea	ftp://ftp.ncbi.nlm.nih.gov/geo/samples/GSM2236nnn/GSM2236077/suppl/GSM2236077_5447338020_F_Grn.idat.gz	48708
GSM2236078	Public on Mar 20 2018	Jul 14 2016	Mar 20 2018	RNA	1	Human gastric cancer	Homo sapiens	tissue: gastric cancer	age: 60	Sex: male	ptstage: T4	pnstage: N0	death: 0	duration overall survival: 142	total RNA	RecoverAll鈩?total nucleic acid isolation kit (Ambion) or the mirVana RNA Isolation Labeling Kit (Ambion) were used. Quality control was performed with NanoDrop 2000 (Thermo Fischer Scientific) and RNA Nano 6000 chip (Agilent).	biotin	Illumina TotalPrep鈩?RNA Amplification Kit was used for synthesis of labeled cRNA.	9606	HumanHT-12 v3.0 Expression BeadChip array (Illumina) was used.	Standard Illumina scanning protocol	SAMPLE 384	Genomestudio, quantile normalization	GPL6947	Yong-Min,,Huh	Yonsei University	50 Shinchon-ro	Seoul	120-749	South Korea	ftp://ftp.ncbi.nlm.nih.gov/geo/samples/GSM2236nnn/GSM2236078/suppl/GSM2236078_5447338020_G_Grn.idat.gz	48708
GSM2236079	Public on Mar 20 2018	Jul 14 2016	Mar 20 2018	RNA	1	Human gastric cancer	Homo sapiens	tissue: gastric cancer	age: 67	Sex: male	ptstage: T2	pnstage: N1	death: 0	duration overall survival: 141	total RNA	RecoverAll鈩?total nucleic acid isolation kit (Ambion) or the mirVana RNA Isolation Labeling Kit (Ambion) were used. Quality control was performed with NanoDrop 2000 (Thermo Fischer Scientific) and RNA Nano 6000 chip (Agilent).	biotin	Illumina TotalPrep鈩?RNA Amplification Kit was used for synthesis of labeled cRNA.	9606	HumanHT-12 v3.0 Expression BeadChip array (Illumina) was used.	Standard Illumina scanning protocol	SAMPLE 385	Genomestudio, quantile normalization	GPL6947	Yong-Min,,Huh	Yonsei University	50 Shinchon-ro	Seoul	120-749	South Korea	ftp://ftp.ncbi.nlm.nih.gov/geo/samples/GSM2236nnn/GSM2236079/suppl/GSM2236079_5447338020_H_Grn.idat.gz	48708
GSM2236080	Public on Mar 20 2018	Jul 14 2016	Mar 20 2018	RNA	1	Human gastric cancer	Homo sapiens	tissue: gastric cancer	age: 62	Sex: male	ptstage: T4	pnstage: N0	death: 1	duration overall survival: 14	total RNA	RecoverAll鈩?total nucleic acid isolation kit (Ambion) or the mirVana RNA Isolation Labeling Kit (Ambion) were used. Quality control was performed with NanoDrop 2000 (Thermo Fischer Scientific) and RNA Nano 6000 chip (Agilent).	biotin	Illumina TotalPrep鈩?RNA Amplification Kit was used for synthesis of labeled cRNA.	9606	HumanHT-12 v3.0 Expression BeadChip array (Illumina) was used.	Standard Illumina scanning protocol	SAMPLE 386	Genomestudio, quantile normalization	GPL6947	Yong-Min,,Huh	Yonsei University	50 Shinchon-ro	Seoul	120-749	South Korea	ftp://ftp.ncbi.nlm.nih.gov/geo/samples/GSM2236nnn/GSM2236080/suppl/GSM2236080_5447338020_I_Grn.idat.gz	48708
GSM2236082	Public on Mar 20 2018	Jul 14 2016	Mar 20 2018	RNA	1	Human gastric cancer	Homo sapiens	tissue: gastric cancer	age: 53	Sex: female	ptstage: T4	pnstage: N0	death: 0	duration overall survival: 131	total RNA	RecoverAll鈩?total nucleic acid isolation kit (Ambion) or the mirVana RNA Isolation Labeling Kit (Ambion) were used. Quality control was performed with NanoDrop 2000 (Thermo Fischer Scientific) and RNA Nano 6000 chip (Agilent).	biotin	Illumina TotalPrep鈩?RNA Amplification Kit was used for synthesis of labeled cRNA.	9606	HumanHT-12 v3.0 Expression BeadChip array (Illumina) was used.	Standard Illumina scanning protocol	SAMPLE 388	Genomestudio, quantile normalization	GPL6947	Yong-Min,,Huh	Yonsei University	50 Shinchon-ro	Seoul	120-749	South Korea	ftp://ftp.ncbi.nlm.nih.gov/geo/samples/GSM2236nnn/GSM2236082/suppl/GSM2236082_5447338020_K_Grn.idat.gz	48708
GSM2236083	Public on Mar 20 2018	Jul 14 2016	Mar 20 2018	RNA	1	Human gastric cancer	Homo sapiens	tissue: gastric cancer	age: 64	Sex: female	ptstage: T4	pnstage: N2	death: 1	duration overall survival: 7	total RNA	RecoverAll鈩?total nucleic acid isolation kit (Ambion) or the mirVana RNA Isolation Labeling Kit (Ambion) were used. Quality control was performed with NanoDrop 2000 (Thermo Fischer Scientific) and RNA Nano 6000 chip (Agilent).	biotin	Illumina TotalPrep鈩?RNA Amplification Kit was used for synthesis of labeled cRNA.	9606	HumanHT-12 v3.0 Expression BeadChip array (Illumina) was used.	Standard Illumina scanning protocol	SAMPLE 389	Genomestudio, quantile normalization	GPL6947	Yong-Min,,Huh	Yonsei University	50 Shinchon-ro	Seoul	120-749	South Korea	ftp://ftp.ncbi.nlm.nih.gov/geo/samples/GSM2236nnn/GSM2236083/suppl/GSM2236083_5447338020_L_Grn.idat.gz	48708
GSM2236084	Public on Mar 20 2018	Jul 14 2016	Mar 20 2018	RNA	1	Human gastric cancer	Homo sapiens	tissue: gastric cancer	age: 59	Sex: female	ptstage: T3	pnstage: N2	death: 0	duration overall survival: 128	total RNA	RecoverAll鈩?total nucleic acid isolation kit (Ambion) or the mirVana RNA Isolation Labeling Kit (Ambion) were used. Quality control was performed with NanoDrop 2000 (Thermo Fischer Scientific) and RNA Nano 6000 chip (Agilent).	biotin	Illumina TotalPrep鈩?RNA Amplification Kit was used for synthesis of labeled cRNA.	9606	HumanHT-12 v3.0 Expression BeadChip array (Illumina) was used.	Standard Illumina scanning protocol	SAMPLE 390	Genomestudio, quantile normalization	GPL6947	Yong-Min,,Huh	Yonsei University	50 Shinchon-ro	Seoul	120-749	South Korea	ftp://ftp.ncbi.nlm.nih.gov/geo/samples/GSM2236nnn/GSM2236084/suppl/GSM2236084_5455362026_A_Grn.idat.gz	48708
GSM2236085	Public on Mar 20 2018	Jul 14 2016	Mar 20 2018	RNA	1	Human gastric cancer	Homo sapiens	tissue: gastric cancer	age: 55	Sex: male	ptstage: T4	pnstage: N0	death: 0	duration overall survival: 152	total RNA	RecoverAll鈩?total nucleic acid isolation kit (Ambion) or the mirVana RNA Isolation Labeling Kit (Ambion) were used. Quality control was performed with NanoDrop 2000 (Thermo Fischer Scientific) and RNA Nano 6000 chip (Agilent).	biotin	Illumina TotalPrep鈩?RNA Amplification Kit was used for synthesis of labeled cRNA.	9606	HumanHT-12 v3.0 Expression BeadChip array (Illumina) was used.	Standard Illumina scanning protocol	SAMPLE 391	Genomestudio, quantile normalization	GPL6947	Yong-Min,,Huh	Yonsei University	50 Shinchon-ro	Seoul	120-749	South Korea	ftp://ftp.ncbi.nlm.nih.gov/geo/samples/GSM2236nnn/GSM2236085/suppl/GSM2236085_5455362026_B_Grn.idat.gz	48708
GSM2236086	Public on Mar 20 2018	Jul 14 2016	Mar 20 2018	RNA	1	Human gastric cancer	Homo sapiens	tissue: gastric cancer	age: 36	Sex: female	ptstage: T4	pnstage: N0	death: 0	duration overall survival: 149	total RNA	RecoverAll鈩?total nucleic acid isolation kit (Ambion) or the mirVana RNA Isolation Labeling Kit (Ambion) were used. Quality control was performed with NanoDrop 2000 (Thermo Fischer Scientific) and RNA Nano 6000 chip (Agilent).	biotin	Illumina TotalPrep鈩?RNA Amplification Kit was used for synthesis of labeled cRNA.	9606	HumanHT-12 v3.0 Expression BeadChip array (Illumina) was used.	Standard Illumina scanning protocol	SAMPLE 392	Genomestudio, quantile normalization	GPL6947	Yong-Min,,Huh	Yonsei University	50 Shinchon-ro	Seoul	120-749	South Korea	ftp://ftp.ncbi.nlm.nih.gov/geo/samples/GSM2236nnn/GSM2236086/suppl/GSM2236086_5455362026_C_Grn.idat.gz	48708
GSM2236087	Public on Mar 20 2018	Jul 14 2016	Mar 20 2018	RNA	1	Human gastric cancer	Homo sapiens	tissue: gastric cancer	age: 68	Sex: male	ptstage: T3	pnstage: N1	death: 0	duration overall survival: 155	total RNA	RecoverAll鈩?total nucleic acid isolation kit (Ambion) or the mirVana RNA Isolation Labeling Kit (Ambion) were used. Quality control was performed with NanoDrop 2000 (Thermo Fischer Scientific) and RNA Nano 6000 chip (Agilent).	biotin	Illumina TotalPrep鈩?RNA Amplification Kit was used for synthesis of labeled cRNA.	9606	HumanHT-12 v3.0 Expression BeadChip array (Illumina) was used.	Standard Illumina scanning protocol	SAMPLE 393	Genomestudio, quantile normalization	GPL6947	Yong-Min,,Huh	Yonsei University	50 Shinchon-ro	Seoul	120-749	South Korea	ftp://ftp.ncbi.nlm.nih.gov/geo/samples/GSM2236nnn/GSM2236087/suppl/GSM2236087_5455362026_D_Grn.idat.gz	48708
GSM2236088	Public on Mar 20 2018	Jul 14 2016	Mar 20 2018	RNA	1	Human gastric cancer	Homo sapiens	tissue: gastric cancer	age: 61	Sex: female	ptstage: T4	pnstage: N0	death: 1	duration overall survival: 34	total RNA	RecoverAll鈩?total nucleic acid isolation kit (Ambion) or the mirVana RNA Isolation Labeling Kit (Ambion) were used. Quality control was performed with NanoDrop 2000 (Thermo Fischer Scientific) and RNA Nano 6000 chip (Agilent).	biotin	Illumina TotalPrep鈩?RNA Amplification Kit was used for synthesis of labeled cRNA.	9606	HumanHT-12 v3.0 Expression BeadChip array (Illumina) was used.	Standard Illumina scanning protocol	SAMPLE 394	Genomestudio, quantile normalization	GPL6947	Yong-Min,,Huh	Yonsei University	50 Shinchon-ro	Seoul	120-749	South Korea	ftp://ftp.ncbi.nlm.nih.gov/geo/samples/GSM2236nnn/GSM2236088/suppl/GSM2236088_5455362026_E_Grn.idat.gz	48708
GSM2236089	Public on Mar 20 2018	Jul 14 2016	Mar 20 2018	RNA	1	Human gastric cancer	Homo sapiens	tissue: gastric cancer	age: 69	Sex: female	ptstage: T4	pnstage: N0	death: 0	duration overall survival: 144	total RNA	RecoverAll鈩?total nucleic acid isolation kit (Ambion) or the mirVana RNA Isolation Labeling Kit (Ambion) were used. Quality control was performed with NanoDrop 2000 (Thermo Fischer Scientific) and RNA Nano 6000 chip (Agilent).	biotin	Illumina TotalPrep鈩?RNA Amplification Kit was used for synthesis of labeled cRNA.	9606	HumanHT-12 v3.0 Expression BeadChip array (Illumina) was used.	Standard Illumina scanning protocol	SAMPLE 395	Genomestudio, quantile normalization	GPL6947	Yong-Min,,Huh	Yonsei University	50 Shinchon-ro	Seoul	120-749	South Korea	ftp://ftp.ncbi.nlm.nih.gov/geo/samples/GSM2236nnn/GSM2236089/suppl/GSM2236089_5455362026_F_Grn.idat.gz	48708
GSM2236090	Public on Mar 20 2018	Jul 14 2016	Mar 20 2018	RNA	1	Human gastric cancer	Homo sapiens	tissue: gastric cancer	age: 86	Sex: male	ptstage: T4	pnstage: N0	death: 1	duration overall survival: 31	total RNA	RecoverAll鈩?total nucleic acid isolation kit (Ambion) or the mirVana RNA Isolation Labeling Kit (Ambion) were used. Quality control was performed with NanoDrop 2000 (Thermo Fischer Scientific) and RNA Nano 6000 chip (Agilent).	biotin	Illumina TotalPrep鈩?RNA Amplification Kit was used for synthesis of labeled cRNA.	9606	HumanHT-12 v3.0 Expression BeadChip array (Illumina) was used.	Standard Illumina scanning protocol	SAMPLE 396	Genomestudio, quantile normalization	GPL6947	Yong-Min,,Huh	Yonsei University	50 Shinchon-ro	Seoul	120-749	South Korea	ftp://ftp.ncbi.nlm.nih.gov/geo/samples/GSM2236nnn/GSM2236090/suppl/GSM2236090_5455362026_G_Grn.idat.gz	48708
GSM2236091	Public on Mar 20 2018	Jul 14 2016	Mar 20 2018	RNA	1	Human gastric cancer	Homo sapiens	tissue: gastric cancer	age: 77	Sex: male	ptstage: T3	pnstage: N0	death: 1	duration overall survival: 123	total RNA	RecoverAll鈩?total nucleic acid isolation kit (Ambion) or the mirVana RNA Isolation Labeling Kit (Ambion) were used. Quality control was performed with NanoDrop 2000 (Thermo Fischer Scientific) and RNA Nano 6000 chip (Agilent).	biotin	Illumina TotalPrep鈩?RNA Amplification Kit was used for synthesis of labeled cRNA.	9606	HumanHT-12 v3.0 Expression BeadChip array (Illumina) was used.	Standard Illumina scanning protocol	SAMPLE 397	Genomestudio, quantile normalization	GPL6947	Yong-Min,,Huh	Yonsei University	50 Shinchon-ro	Seoul	120-749	South Korea	ftp://ftp.ncbi.nlm.nih.gov/geo/samples/GSM2236nnn/GSM2236091/suppl/GSM2236091_5455362026_H_Grn.idat.gz	48708
GSM2236092	Public on Mar 20 2018	Jul 14 2016	Mar 20 2018	RNA	1	Human gastric cancer	Homo sapiens	tissue: gastric cancer	age: 58	Sex: male	ptstage: T4	pnstage: N0	death: 0	duration overall survival: 149	total RNA	RecoverAll鈩?total nucleic acid isolation kit (Ambion) or the mirVana RNA Isolation Labeling Kit (Ambion) were used. Quality control was performed with NanoDrop 2000 (Thermo Fischer Scientific) and RNA Nano 6000 chip (Agilent).	biotin	Illumina TotalPrep鈩?RNA Amplification Kit was used for synthesis of labeled cRNA.	9606	HumanHT-12 v3.0 Expression BeadChip array (Illumina) was used.	Standard Illumina scanning protocol	SAMPLE 398	Genomestudio, quantile normalization	GPL6947	Yong-Min,,Huh	Yonsei University	50 Shinchon-ro	Seoul	120-749	South Korea	ftp://ftp.ncbi.nlm.nih.gov/geo/samples/GSM2236nnn/GSM2236092/suppl/GSM2236092_5455362026_I_Grn.idat.gz	48708
GSM2236093	Public on Mar 20 2018	Jul 14 2016	Mar 20 2018	RNA	1	Human gastric cancer	Homo sapiens	tissue: gastric cancer	age: 59	Sex: male	ptstage: T3	pnstage: N0	death: 0	duration overall survival: 151	total RNA	RecoverAll鈩?total nucleic acid isolation kit (Ambion) or the mirVana RNA Isolation Labeling Kit (Ambion) were used. Quality control was performed with NanoDrop 2000 (Thermo Fischer Scientific) and RNA Nano 6000 chip (Agilent).	biotin	Illumina TotalPrep鈩?RNA Amplification Kit was used for synthesis of labeled cRNA.	9606	HumanHT-12 v3.0 Expression BeadChip array (Illumina) was used.	Standard Illumina scanning protocol	SAMPLE 399	Genomestudio, quantile normalization	GPL6947	Yong-Min,,Huh	Yonsei University	50 Shinchon-ro	Seoul	120-749	South Korea	ftp://ftp.ncbi.nlm.nih.gov/geo/samples/GSM2236nnn/GSM2236093/suppl/GSM2236093_5455362026_J_Grn.idat.gz	48708
GSM2236094	Public on Mar 20 2018	Jul 14 2016	Mar 20 2018	RNA	1	Human gastric cancer	Homo sapiens	tissue: gastric cancer	age: 64	Sex: male	ptstage: T4	pnstage: N0	death: 1	duration overall survival: 37	total RNA	RecoverAll鈩?total nucleic acid isolation kit (Ambion) or the mirVana RNA Isolation Labeling Kit (Ambion) were used. Quality control was performed with NanoDrop 2000 (Thermo Fischer Scientific) and RNA Nano 6000 chip (Agilent).	biotin	Illumina TotalPrep鈩?RNA Amplification Kit was used for synthesis of labeled cRNA.	9606	HumanHT-12 v3.0 Expression BeadChip array (Illumina) was used.	Standard Illumina scanning protocol	SAMPLE 400	Genomestudio, quantile normalization	GPL6947	Yong-Min,,Huh	Yonsei University	50 Shinchon-ro	Seoul	120-749	South Korea	ftp://ftp.ncbi.nlm.nih.gov/geo/samples/GSM2236nnn/GSM2236094/suppl/GSM2236094_5455362026_K_Grn.idat.gz	48708
GSM2236095	Public on Mar 20 2018	Jul 14 2016	Mar 20 2018	RNA	1	Human gastric cancer	Homo sapiens	tissue: gastric cancer	age: 51	Sex: male	ptstage: T4	pnstage: N0	death: 0	duration overall survival: 150	total RNA	RecoverAll鈩?total nucleic acid isolation kit (Ambion) or the mirVana RNA Isolation Labeling Kit (Ambion) were used. Quality control was performed with NanoDrop 2000 (Thermo Fischer Scientific) and RNA Nano 6000 chip (Agilent).	biotin	Illumina TotalPrep鈩?RNA Amplification Kit was used for synthesis of labeled cRNA.	9606	HumanHT-12 v3.0 Expression BeadChip array (Illumina) was used.	Standard Illumina scanning protocol	SAMPLE 401	Genomestudio, quantile normalization	GPL6947	Yong-Min,,Huh	Yonsei University	50 Shinchon-ro	Seoul	120-749	South Korea	ftp://ftp.ncbi.nlm.nih.gov/geo/samples/GSM2236nnn/GSM2236095/suppl/GSM2236095_5455362026_L_Grn.idat.gz	48708
